# Supplementary material for: Genetic mechanisms underlying East Asian and European Facial differentiation
Source: Research Square preprint supplement (doi:10.21203/rs.3.rs-604881/v1), 2021-06-23
Supplement: Supplementary file 1 [file be0365a6a428590e2e2dbf34.xlsx]

## Sheet: Table1
Table 1. 13 variants mainly associated with East Asian facial similarity (EAS-FS)
rsID	CytoBand	A1	A2	P-value	EAS A2freq	EUR A2freq	PBS_EAS	PBS_EUR	Fst_EURvEAS	Seg	Candidate gene	Allele age (25 years per generation)
rs7516137	1p36.32	C	G	9.75×10-29	0.5529	0.3181	0.0772407	0.035526	0.106641	18	PRDM16	537708
rs6669519*†	1p31.1	T	A	3.40×10-08	0.7812	0.1733	0.83077	0	0.546862	24	LHX8	51373
rs10923710	1p12	G	T	1.20×10-44	0.5072	0.1931	0.261996	0	0.206754	19, 26	TBX15	88185
rs3827760	2q12.3	A	G	2.17×10-13	0.92067	0	2.58671	0.306047	0.944577	27	EDAR	36410
rs12473319*†	2q37.1	G	C	1.35×10-10	0.4784	0.0223	0.554494	0.160933	0.511017	24	DIS3L2	39385
rs12632544	3q23	T	A	1.87×10-65	0.5	0	0.571431	0.331672	0.59469	24, 25, 26	MRPS22	626678
rs147468294	6q14.3	A	AC	9.02×10-17	0.6899	1	0.298695	0.207047	0.396942	7	TBX18	46640
rs111847181	8p23.1	G	GAC	5.28×10-09	0.96394	0.4542	0.779472	0	0.424436	18	PPP1R3B	788343
rs4749259*†	10p12.1	T	C	3.88×10-29	0.5841	0.93564	0.370479	0.0367035	0.334477	26	MKX	298528
rs12258832*†	10p12.1	A	G	1.61×10-24	0.6899	0.8923	0.133499	0.00494824	0.129291	26	MKX	64715
rs3740550*†	10q26.11	A	G	6.70×10-43	0.875	0.993812	0.127163	0.0289249	0.144516	19	RAB11FIP2	64603
rs8068343*	17q24.3	T	C	3.32×10-51	0.4615	0.95916	0.469548	0.281156	0.527966	18	SOX9	1261665
rs9980535*†	21q21.3	A	G	3.99×10-11	0.762	0.1757	0.356513	0.380291	0.521359	18	LINC00161	1030805
* Novel variants in our GWAS finding, which are not in LD (r2<0.1) with variants reported in previous facial GWAS studies, see in ST7.
† Novel genes in our GWAS finding, which are not reported in previous facial GWAS studies.

## Sheet: ST1
Supplementary Table 1. Characteristic of all cohorts
Legend: The table provides the basic information of three cohorts used in our study. For each cohort, the table contains cohort name (SNP array), sample size, percentage of female, age, and BMI.
Cohort	Sample Size	SEX female(%)	AGE±SD	BMI±SD
NSPT (GSA)	2879	1837 (63.81%)	49.89±12.51	24.49±3.44
NHC (GSA)	4089	2092 (51.16%)	46.71±13.88	24.41±3.34
TZL (ZhongHuaV8)	2706	1744 (64.45%)	56.30±9.50	24.41±3.02
NSPT: the National Survey of Physical Traits (NSPT) cohort
NHC: the Northern Han Chinese (NHC) cohort
TZL: the Taizhou Longitudinal Study (TZL) cohort
GSA: the Illumina Infinium Global Screening Array
ZhongHuaV8: the Illumina HumanOmniZhongHua-8 Array

## Sheet: ST2
Supplementary Table 2. 244 lead variants associated with normal-range variation
Legend: Lead variants reaching genome-wide significance (P = 5 × 10-8) in meta-analysis. For each SNP, this table contains chromosome, position (GRCh37/hg19), cytogenetic band, allele information, the frequency of the A1 allele in East Asian (EAS-A1freq) and European (EUR-A1freq) populations, meta-analysis P-value (META_P), discovery P-value, replication P-value, whether the lowest meta-analysis …
RSID	GREGOR	Chr	Pos(hg19)	Cytoband	A1	A2	EAS-A1freq	EUR-A1freq	META_P	Discovery_P	Replication_P	Standard	Best Segment	Associated Regions	Novel (LD r2<0.1)	LD_max in three population	Candidate SNP within LD (r2>0.1) in previous study	previously reported phenotypes	previously reported associated regions	Consistency with previously reported pheotypes	Candidate gene	Func.refGene	Novel Gene of facial GWAS	Fst_EURvEAS	PBS_EAS	PBS_EUR
rs2377039		1	2803806	1p36.32	C	T	0.4833	0.6151	2.52348e-10	2.1928e-06	5.7544e-06	Study significant	30	Forehead	No	0.162	rs76244841	Segment 30	Eye	No	TTC34, PRDM16	intergenic	No	0.0272136	0.0480842	-0.0204934
rs7516137		1	3253839	1p36.32	C	G	0.4299	0.6819	9.7499e-29	1.00231e-16	5.8479e-15	Study significant	37	Nose	No	1	rs1572037	Segment 2	Nose, Maxillary	Yes	PRDM16	intronic	No	0.106641	0.0772407	0.035526
rs113365915	rs17036019	1	11002956	1p36.22	CT	C	0.4841	0.2191	1.70608e-10	2.54097e-07	6.93426e-05	Study significant	37	Nose	Yes	0.055	NA	NA	NA	NA	CASZ1; C1orf127	intergenic	No	0.152988	-0.169266	0.335307
rs71631750		1	16083898	1p36.21	C	G	0.1753	0.2079	3.64754e-08	5.72796e-08	0.0473151	Genome-wide significant	31	Forehead	Yes	0.052	NA	NA	NA	NA	FBLIM1	intronic	Yes	0.0103831	-0.00522466	0.015662
rs111467622		1	18996519	1p36.13	A	G	0.2848	0.1064	1.53109e-25	1.32739e-18	9.31108e-09	Study significant	37	Nose	Yes	0.094	NA	NA	NA	NA	PAX7	intronic	No	0.128902	0.172643	-0.0346423
rs4912094		1	19762466	1p36.13	T	C	0.2612	0.2463	1.26183e-09	5.71479e-10	0.0668344	Genome-wide significant	36	Nose	No	0.858	rs4912082	Segment 10	Nose	Yes	CAPZB	intronic	No	-0.00173053	0.00539928	-0.00712831
rs72906949		1	53970693	1p32.3	T	C	0.3032	0.03218	4.54988e-09	3.63078e-05	3.41193e-06	Genome-wide significant	37	Nose	Yes	0.042	NA	NA	NA	NA	GLIS1	intergenic	No	0.25656	-0.0284845	0.324952
rs3887651		1	53999509	1p32.3	C	T	0.487	0.9839	1.31826e-18	1.50661e-14	8.26038e-06	Study significant	37	Nose	Yes	0.031	NA	NA	NA	NA	GLIS1	intronic	No	0.507772	-0.00796542	0.716779
rs2948053		1	54062273	1p32.3	A	G	0.455	0.6733	3.04089e-11	8.57038e-07	1.35831e-06	Study significant	4	nose-maxillary	No	0.125	rs702489	Self-reported nose size	Nose	Yes	GLIS1	intronic	No	0.125581	-0.0528649	0.187061
rs12562360		1	60994215	1p32.1	G	A	0.3217	0.5322	4.00867e-20	9.2683e-15	3.94457e-07	Study significant	37	Nose	No	1	rs4916068	Nose morphology	Nose	Yes	C1orf87	ncRNA_intronic	No	0.106825	-0.0735098	0.186483
rs3125927		1	68862622	1p31.3	G	A	0.1273	0.6918	2.36592e-09	4.40555e-06	4.05509e-05	Genome-wide significant	37	Nose	Yes	0.057	NA	NA	NA	NA	RPE65	intergenic	No	0.476633	0.425425	0.222047
rs6669519		1	75584009	1p31.1	T	A	0.2432	0.8267	3.39625e-08	7.92501e-07	0.00619441	Genome-wide significant	9	Glabellar	Yes	0.071	NA	NA	NA	NA	LHX8	intergenic	Yes	0.546862	0.83077	-0.0392113
rs72631743		1	118769603	1p12	G	T	0.2304	0.02351	1.25603e-11	9.35406e-07	3.39625e-07	Study significant	6	Eye	Yes	0.028	NA	NA	NA	NA	SPAG17	intergenic	Yes	0.214211	0.212971	0.0280962
rs9661038		1	119146085	1p12	T	G	0.1636	0.3676	4.4157e-11	1.42233e-07	2.85102e-05	Study significant	1	Eye	No	0.336	rs7513680	Segment 50	Mandible	No	TBX15	intergenic	No	0.0859722	0.123769	-0.0338743
rs10923710		1	119502774	1p12	G	T	0.4865	0.8069	1.1995e-44	7.21107e-33	1.03992e-13	Study significant	1	mandible,mandible mouth,maxillary mouth,maxillary,Glabellar,Eye,Temporal,Zygoma,Forehead	No	0.202	rs1766786	Self-reported chin dimples	Mandible, Lower mouth, Maxillary,Upper mouth	Yes	TBX15	intronic	No	0.206754	0.261996	-0.0303743
rs1779445		1	119508412	1p12	T	C	0.1611	0.2153	5.01187e-21	1.75792e-16	2.47742e-06	Study significant	12	Glabellar,Eye,Temporal,Zygoma	No	0.968	rs1766786	Self-reported chin dimples	Mandible, Lower mouth, Maxillary,Upper mouth	No	TBX15	intronic	No	0.00433737	0.0167039	-0.0123571
rs375911694	rs76762554	1	150716112	1q21.3	A	ATATAT	0.2233	0.0854	1.30317e-10	4.16869e-06	7.96159e-07	Study significant	23	mandible	Yes	0.041	NA	NA	NA	NA	CTSS	intronic	Yes	0.0521632	0.081904	-0.028331
rs1506948		1	165300839	1q23.3	T	C	0.2162	0.1547	3.53183e-09	6.77642e-06	3.67282e-05	Genome-wide significant	5	mandible	Yes	0.088	NA	NA	NA	NA	LMX1A	intronic	Yes	0.00395974	-0.00652022	0.0104878
rs2476023		1	197351039	1q31.3	C	G	0.2459	0.2302	5.70164e-37	2.74157e-22	1.47911e-17	Study significant	21	mandible,mandible mouth,maxillary mouth	No	1	rs2476023	Self-reported chin dimples	Mandible, Lower mouth, Maxillary,Upper mouth	Yes	CRB1	intronic	No	-0.000552762	0.018191	-0.0187436
rs12042657		1	245378575	1q44	A	C	0.1359	0	1.94984e-13	4.90908e-09	3.03389e-06	Study significant	37	Nose	Yes	0.02	NA	NA	NA	NA	KIF26B	ncRNA_intronic	Yes	0.165714	-0.308492	0.489671
rs3856440		2	8721867	2p25.1	A	G	0.3847	0.5359	4.06443e-08	3.62243e-06	0.00162555	Genome-wide significant	36	Nose	Yes	0.023	NA	NA	NA	NA	ID2	ncRNA_intronic	Yes	0.0562993	-0.069808	0.127754
rs6725667		2	19524172	2p24.1	G	T	0.4586	0.1584	1.55239e-22	4.84172e-13	2.8774e-12	Study significant	6	maxillary mouth,nose,Eye,Temporal	No	0.923	rs79037251	Segment 24	Upper mouth,Zygoma	Yes	OSR1	intergenic	No	0.216625	0.168061	0.0760828
rs2374385		2	42194758	2p21	A	G	0.4921	0.1733	9.52796e-10	5.64937e-07	0.000196789	Study significant	48	Glabellar	No	0.305	rs6740960	Segment 1	Wholeface	Yes	PKDCC	intergenic	No	0.164818	-0.0256288	0.205734
rs2342419		2	45269086	2p21	A	G	0.0693	0.2921	5.22396e-27	1.69824e-14	3.82825e-16	Study significant	37	maxillary mouth,nose	No	0.972	rs921119	Segment 36	Upper mouth,Nose	Yes	SIX2	intergenic	No	0.112886	0.0522259	0.0675559
rs2009262		2	56012214	2p16.1	T	C	0.1496	0.7871	2.72898e-09	2.2856e-08	0.0120781	Genome-wide significant	3	eye-glabellar-zygoma-temporal	No	0.387	rs1367228	Segment 30	Eye	Yes	EFEMP1	intergenic	No	0.532961	1.00178	-0.240436
rs13403156		2	66085159	2p14	G	A	0.2358	0.04827	2.78612e-20	1.08393e-16	1.83654e-05	Study significant	1	mandible	No	0.117	rs6546175	Segment 58	Forehead	No	SPRED2	intergenic	No	0.176471	-0.203232	0.397389
rs72621585		2	67898936	2p14	A	G	0.4104	0.7983	1.38357e-09	1.00462e-07	0.00187499	Genome-wide significant	54	Zygoma	No	0.304	rs11675008	Segment 49	Zygoma	Yes	ETAA1	intergenic	No	0.280512	0.410178	-0.0809626
rs1529409		2	71830689	2p13.2	T	C	0.05561	0.07178	1.37404e-17	1.29718e-12	9.66051e-07	Study significant	4	maxillary mouth,nose	Yes	0.068	NA	NA	NA	NA	DYSF	intronic	Yes	-0.00188078	-0.00740341	0.0055244
rs6745909		2	104057121	2q12.1	A	T	0.07911	0.05322	2.01837e-09	1.28233e-08	0.014388	Genome-wide significant	6	eye-glabellar-zygoma-temporal	Yes	0.049	NA	NA	NA	NA	TMEM182	intergenic	Yes	0.00136958	-0.00827394	0.00964445
rs13426125		2	104653581	2q12.1	T	G	0.1148	0.07673	2.91072e-09	2.06538e-05	4.75335e-06	Genome-wide significant	13	zygomatic-temporal	Yes	0.077	NA	NA	NA	NA	LOC100287010	intergenic	Yes	-0.00043729	-0.00484707	0.00440988
rs3827760		2	109513601	2q12.3	A	G	0.05815	1	2.1677e-13	1.3122e-10	0.000187068	Study significant	16	mandible mouth,Zygoma	No	1	rs3827760	Chin protrusion;Distance between left ectocanthion and left otobasion inferius	Mandible, Lower mouth, Zygoma	Yes	EDAR	exonic	No	0.944577	2.58671	0.306047
rs2422241		2	119043036	2q14.2	G	A	0.4802	0.3886	4.73151e-14	2.58821e-09	1.24165e-06	Study significant	3	Glabellar,Eye	No	1	rs11692600	Segment14	Glabellar,Forehead	Yes	INSIG2	intergenic	No	0.0154751	-0.0471867	0.0627828
rs332734		2	119452635	2q14.2	T	C	0.4993	0.4703	3.65595e-11	8.31764e-10	0.00409261	Study significant	3	Eye	No	0.78	rs332108	Segment14	Glabellar,Forehead	No	EN1	intergenic	No	0.00169255	0.00836597	-0.00667199
rs2044473		2	129751723	2q14.3	C	T	0.2182	0.526	3.42768e-08	1.6293e-06	0.00314775	Genome-wide significant	38	maxillary	Yes	0.052	NA	NA	NA	NA	LOC101927881	intergenic	Yes	0.191746	-0.00920733	0.222086
rs72854416		2	145675468	2q22.3	A	G	0.2033	0.2067	3.25837e-12	3.1842e-06	4.66659e-09	Study significant	38	Nose,maxillary	No	1	rs17479393	Self-reported chin dimples	Mandible, Lower mouth, Maxillary,Upper mouth	Yes	TEX41	ncRNA_intronic	No	0.00127463	-0.0081871	0.00946254
rs17409597		2	146045060	2q22.3	C	T	0.3844	0.5235	1.53462e-13	1.1324e-08	7.34514e-07	Study significant	24	Glabellar	No	0.156	rs17479393	Self-reported chin dimples	Mandible, Lower mouth, Maxillary,Upper mouth	No	TEX41	intergenic	No	0.0545925	-0.0593068	0.115446
rs202205854	rs72862334	2	146586829	2q22.3	T	TA	0.2524	0.1015	8.05378e-10	1.67494e-06	3.94457e-05	Study significant	9	nose-maxillary	Yes	0.074	NA	NA	NA	NA	TEX41	intergenic	No	0.102706	0.128549	-0.0201768
rs6718516		2	176991924	2q31.1	C	G	0.3313	0.6572	6.9024e-14	1.21899e-07	5.86138e-09	Study significant	6	Nose,Zygoma	Yes	0.061	NA	NA	NA	NA	HOXD9	intergenic	No	0.202248	-0.106044	0.332002
rs1524082		2	177111419	2q31.1	A	G	0.3365	0.2884	1.60694e-64	2.87078e-43	1.37721e-23	Study significant	4	mandible,mandible mouth,maxillary mouth,nose,maxillary,Glabellar,Eye,Zygoma,Forehead	No	1	rs970797	Segment1	Wholeface	Yes	MTX2	intergenic	No	0.00220835	0.0240316	-0.0218208
rs12619464		2	177345714	2q31.1	T	C	0.1166	0.01114	2.08449e-35	1.49968e-30	2.38781e-07	Study significant	42	mandible,mandible mouth,maxillary mouth	Yes	0.023	NA	NA	NA	NA	MTX2	intergenic	No	0.100543	0.0923509	0.0136131
rs13408200		2	177368779	2q31.1	C	T	0.1491	0.8738	2.13796e-15	1.18032e-12	0.000168655	Study significant	4	Nose	No	1	rs59156997	Self-reported chin dimples	Mandible, Lower mouth, Maxillary,Upper mouth	No	MTX2	intergenic	No	0.693235	1.00731	0.174364
rs10710424	rs7562843	2	200502849	2q33.1	AT	A	0.4354	0.002475	4.9545e-11	7.12853e-09	0.000870964	Study significant	1	Nose	Yes	0.076	NA	NA	NA	NA	LINC01877	ncRNA_intronic	Yes	0.539961	0.578035	0.198409
rs348979		2	222926192	2q36.1	C	T	0.2535	0.5087	3.74111e-08	2.61818e-06	0.00210863	Genome-wide significant	37	Nose	Yes	0.058	NA	NA	NA	NA	PAX3	intergenic	No	0.139957	0.379172	-0.228399
rs9288572		2	222962363	2q36.1	G	A	0.4674	0.8502	2.74789e-23	9.66051e-14	3.2961e-12	Study significant	9	Nose	Yes	0.051	NA	NA	NA	NA	PAX3	intergenic	No	0.281058	0.285941	0.0440335
rs10209141		2	223056368	2q36.1	C	A	0.3555	0.5953	4.01791e-11	1.02565e-08	0.000498884	Study significant	9	Nose	No	1	rs7559271	Nasion-midendocanthion distance;Distance between left entocanthion and right alare	Nose	Yes	PAX3	intergenic	No	0.0691034	0.00692844	0.0646786
rs111888358	rs34511789	2	223436184	2q36.1	CGAACTCAT	C	0.1215	0.3762	4.28549e-10	1.05196e-07	0.00053827	Study significant	18	Nose	No	0.247	rs7579011	Segment2	Nose, Maxillary	Yes	FARSB	UTR3	No	0.145052	0.0944072	0.0623075
rs12614976		2	223542896	2q36.1	T	A	0.463	0.7042	2.90402e-14	3.74111e-08	1.25893e-08	Study significant	9	Nose,maxillary,Eye	No	0.859	rs7579011	Segment2	Nose, Maxillary	Yes	MOGAT1	intronic	No	0.126136	-0.0355756	0.170406
rs12473319		2	232880971	2q37.1	G	C	0.4846	0.9777	1.34896e-10	9.44061e-07	8.77001e-06	Study significant	49	Glabellar	Yes	0.082	NA	NA	NA	NA	DIS3L2	intronic	Yes	0.511017	0.554494	0.160933
rs2121905		2	239491831	2q37.3	T	A	0.3802	0.4752	1.35831e-12	2.02768e-07	1.79061e-07	Study significant	37	Nose	Yes	0.041	NA	NA	NA	NA	TWIST2	intergenic	Yes	0.0105925	0.0441265	-0.0334775
rs116910218		2	239690223	2q37.3	G	A	0.1339	0	2.29087e-08	8.51138e-07	0.00394457	Genome-wide significant	12	eye-glabellar	Yes	0.015	NA	NA	NA	NA	TWIST2	intergenic	Yes	0.152918	0.126138	0.0398199
rs1828554		3	9308332	3p25.3	T	G	0.1802	0.4171	2.1677e-12	1.62181e-09	0.000160694	Study significant	9	Nose	No	0.886	rs4686337	Segment11	Nose	Yes	SRGAP3	intergenic	No	0.115804	-0.0498118	0.172888
rs60889564	rs13353459	3	66896826	3p14.1	G	GA	0.3731	0.1015	2.06063e-15	3.86367e-10	3.25837e-07	Study significant	37	Nose	Yes	0.03	NA	NA	NA	NA	KBTBD8	intergenic	Yes	0.169877	0.0943376	0.0918438
rs10713146	rs9825176	3	71239625	3p13	C	CA	0.3056	0.2178	6.39735e-15	1.1695e-09	3.01995e-07	Study significant	18	Nose	No	0.955	rs9310211	Segment23	Nose	Yes	FOXP1	intronic	No	0.0230186	-0.0970041	0.120292
rs36024188		3	86960554	3p12.1	A	AG	0.1964	0.3478	4.02717e-09	5.57186e-07	0.00100231	Genome-wide significant	4	nose-maxillary	No	0.789	rs3072056	Segment2	Nose, Maxillary	Yes	VGLL3	intergenic	No	0.0697848	0.0467455	0.0255938
rs73844434		3	87029924	3p12.1	C	T	0.1212	0.006188	1.1246e-08	2.49459e-06	0.00058479	Genome-wide significant	19	maxillary	Yes	0.092	NA	NA	NA	NA	VGLL3	intronic	No	0.109296	-0.207009	0.322753
rs7431338		3	88880647	3p11.1	C	T	0.4611	0.3614	8.26038e-09	8.62979e-07	0.00135831	Genome-wide significant	37	Nose	Yes	0.039	NA	NA	NA	NA	EPHA3	intergenic	Yes	0.0143254	-0.00719941	0.0216284
rs6765833		3	89035939	3p11.1	T	C	0.1334	0.1498	1.3213e-09	1e-08	0.0122462	Genome-wide significant	49	Glabellar,Forehead	Yes	0.027	NA	NA	NA	NA	EPHA3	intergenic	Yes	0.00322762	0.0136868	-0.0104539
rs4857879		3	128064118	3q21.3	C	A	0.4236	0.1621	3.19154e-30	8.97429e-21	2.00909e-11	Study significant	34	maxillary mouth,nose	No	0.804	rs2977562	Upper lip morphology	Upper mouth	Yes	EEFSEC	intronic	No	0.188005	-0.0111739	0.219435
rs55686439		3	128201376	3q21.3	A	C	0.05375	0.2017	2.50611e-09	6.96627e-06	2.22844e-05	Genome-wide significant	37	Nose	Yes	0.038	NA	NA	NA	NA	GATA2	intronic	Yes	0.0926972	0.0745244	0.0227546
rs9812461		3	133820689	3q22.2	G	A	0.4148	0.4059	1.87932e-14	8.6896e-09	6.93426e-08	Study significant	4	maxillary mouth,nose	No	0.841	rs6795164	Segment1	Wholeface	Yes	RYK	intergenic	No	0.00123304	-0.0127565	0.0139903
rs111414955	rs67626684	3	138668060	3q22.3	CAG	C	0.09703	0.01114	1.52055e-12	2.19786e-08	5.2723e-06	Study significant	12	Eye	Yes	0.064	NA	NA	NA	NA	FOXL2	intronic	Yes	0.0627878	-0.0819707	0.146816
rs72630201		3	138839901	3q23	T	C	0.2863	0.06683	4.12098e-13	7.11214e-09	4.65586e-06	Study significant	12	Glabellar,Eye	Yes	0.037	NA	NA	NA	NA	BPESC1	ncRNA_intronic	Yes	0.152513	0.160571	0.00490927
rs12632544		3	138946868	3q23	T	A	0.4728	1	1.86638e-65	1.41579e-42	1.77011e-25	Study significant	3	Nose,maxillary,Glabellar,Eye,Temporal,Zygoma,Forehead	No	0.932	rs12633011	Eyes	Eye	Yes	MRPS22	intergenic	No	0.59469	0.571431	0.331672
rs9836369		3	157500853	3q25.32	A	C	0.2294	0.5161	9.72747e-09	0.000564937	3.42768e-08	Genome-wide significant	6	eye-glabellar-zygoma-temporal	No	0.511	rs792736	Segment3	Forehead,Eye,Glabellar,Zygoma,Temporal,Mandible,Lower mouth	Yes	SHOX2	intergenic	No	0.15887	0.204339	-0.0313301
rs552757		3	177309024	3q26.32	A	G	0.4435	0.3812	2.45471e-08	2.85102e-06	0.0012106	Genome-wide significant	49	Glabellar	No	0.733	rs2133593	Self-reported chin dimples	Mandible, Lower mouth, Maxillary,Upper mouth	No	LINC00578	ncRNA_intronic	No	-0.000328902	0.0202157	-0.0205446
rs12633616		3	184339099	3q27.1	T	A	0.4113	0.5507	1e-34	1.50314e-25	4.70977e-11	Study significant	37	Nose	No	1	rs13097965	Self-reported nose size	Nose	Yes	EPHB3	intergenic	No	0.00861697	-0.0278899	0.0365442
rs9844571		3	184445284	3q27.1	G	A	0.4545	0.5248	3.31131e-12	9.93116e-10	0.000397192	Study significant	4	maxillary	Yes	0.067	NA	NA	NA	NA	MAGEF1	ncRNA_intronic	Yes	0.00807242	-0.0081656	0.0162708
rs74921869		4	1005179	4p16.3	T	TGGGGCGGGGCGGGGGCG	0.2953	0.2203	1.63305e-13	1.75792e-10	0.000106905	Study significant	9	Nose	No	0.924	rs74921869	Segment5	Nose	Yes	FGFRL1	intronic	No	0.0339358	0.0639826	-0.0294577
rs371525829		4	4774124	4p16.2	T	C	0.3394	0.4084	1.49624e-11	2.63027e-07	3.12608e-06	Study significant	9	Nose	Yes	0.047	NA	NA	NA	NA	MSX1	ncRNA_intronic	No	0.00891154	0.0581657	-0.0492142
rs34998838		4	4794202	4p16.2	T	C	0.4299	0.3131	5.91562e-15	2.56448e-09	9.12011e-08	Study significant	18	Nose	No	0.794	rs13117653	Segment34	Nose	Yes	MSX1	intergenic	No	0.0289698	-0.0407143	0.070112
rs3815181		4	7204493	4p16.1	C	T	0.2593	0.125	2.58226e-08	3.03389e-07	0.0110154	Genome-wide significant	48	Glabellar	Yes	0.094	NA	NA	NA	NA	SORCS2	intronic	Yes	0.0618559	0.0168624	0.0469893
rs7434700		4	8711408	4p16.1	T	A	0.2551	0.1027	1.80302e-08	4.83059e-05	1.59588e-05	Genome-wide significant	1	Wholeface	Yes	0.036	NA	NA	NA	NA	CPZ	intergenic	Yes	0.0637288	-0.168378	0.234228
rs1874285		4	18607550	4p15.31	T	G	0.4692	0.198	2.19786e-08	2.82488e-07	0.0101158	Genome-wide significant	1	Wholeface	Yes	0.072	NA	NA	NA	NA	LCORL	intergenic	Yes	0.162965	0.21516	-0.037271
rs117922332		4	22394239	4p15.2	G	T	0.06508	0.001238	4.86407e-08	6.01174e-05	4.60257e-05	Genome-wide significant	37	Nose	Yes	0.074	NA	NA	NA	NA	ADGRA3	exonic	Yes	0.0779545	0.0505202	0.0306405
rs60442375		4	42393308	4p13	G	A	0.3399	0.5879	7.87046e-09	5.24807e-06	0.000148594	Genome-wide significant	37	Nose	Yes	0.05	NA	NA	NA	NA	SHISA3	intergenic	Yes	0.0903755	0.125699	-0.0309759
rs2203049		4	61371870	4q13.1	C	T	0.1383	0.4109	1.26765e-08	1.18304e-05	8.87156e-05	Genome-wide significant	41	mandible	Yes	0.041	NA	NA	NA	NA	LPHN3	intergenic	Yes	0.159101	0.0754972	0.0977865
rs6843082		4	111718067	4q25	A	G	0.2657	0.7636	5.88844e-10	2.50035e-05	2.95121e-07	Study significant	34	maxillary mouth	Yes	0.036	NA	NA	NA	NA	PITX2	intergenic	Yes	0.378511	0.388991	0.0866462
rs326899		4	112672623	4q25	G	T	0.4194	0.5792	1.43549e-09	3.38844e-09	0.0269774	Genome-wide significant	18	Nose	Yes	0.016	NA	NA	NA	NA	PITX2	intergenic	Yes	0.0338333	-0.0562464	0.0906653
rs7694450		4	121998104	4q27	A	G	0.2973	0.448	1.16145e-09	6.3387e-06	8.95365e-06	Genome-wide significant	32	mandible mouth	No	1	rs7694450	Segment9	Upper mouth	Yes	NDNF	intergenic	No	0.0563892	0.229981	-0.171939
rs200087457	rs10012123	4	126951202	4q28.1	TC	T	0.3514	0.2166	2.18776e-09	4.38531e-06	3.67282e-05	Genome-wide significant	19	maxillary	No	1	rs145365164	Self-reported chin dimples	Mandible, Lower mouth, Maxillary,Upper mouth	Yes	MIR2054	intergenic	No	0.0260218	0.0196301	0.00673628
rs17011824		4	127810815	4q28.1	T	G	0.2916	0.01856	6.39735e-11	3.75837e-08	0.000210378	Study significant	4	Nose	Yes	0.035	NA	NA	NA	NA	INTU	intergenic	No	0.341445	0.35391	0.0637969
rs4834173		4	127983463	4q28.1	G	C	0.143	0.3923	1.40605e-16	2.89068e-14	0.000321366	Study significant	4	maxillary mouth,nose,Eye	No	1	rs62324070	Segment2	Nose, Maxillary	Yes	INTU	intergenic	No	0.12708	-0.0396798	0.175591
rs9995821		4	154828366	4q31.3	C	T	0.1917	0.1931	6.96627e-90	6.96627e-64	4.02717e-28	Study significant	37	maxillary mouth,nose,maxillary	No	1	rs9995821	Segment2	Nose, Maxillary	Yes	SFRP2	intergenic	No	-0.00182239	-0.00155977	-0.000260962
rs6834372		4	155204724	4q31.3	A	G	0.3556	0.302	6.16595e-10	2.28034e-05	3.79315e-07	Study significant	6	eye-glabellar	Yes	0.072	NA	NA	NA	NA	DCHS2	intronic	No	0.00268767	0.0235365	-0.0208452
rs6814518		4	174469388	4q34.1	T	C	0.4559	0.5186	8.99498e-09	8.97429e-07	0.00142889	Genome-wide significant	33	mandible,mandible mouth	No	0.589	rs4695846	Segment53	Mandible	Yes	HAND2	ncRNA_intronic	No	2.41568e-05	-0.0129407	0.0129649
rs17537048		5	1901205	5p15.33	G	A	0.225	0.2302	1.08893e-17	9.09913e-11	3.12608e-09	Study significant	37	Nose	Yes	0.038	NA	NA	NA	NA	IRX4	downstream	Yes	-0.00169098	0.00469735	-0.0063869
rs40646		5	4977136	5p15.32	C	T	0.3996	0.07426	4.60257e-08	1.41906e-05	0.000358922	Genome-wide significant	50	Eye	Yes	0.023	NA	NA	NA	NA	LINC01020	intergenic	Yes	0.312078	0.378213	-0.0041329
rs7712213		5	44451269	5p12	C	A	0.343	0.2054	7.16143e-14	1.09901e-10	7.39605e-05	Study significant	13	Temporal	No	0.9	rs4866909	Segment62	Tempora	Yes	FGF10	intergenic	No	0.0459739	-0.0623221	0.109386
rs2891934		5	82125335	5q14.2	C	T	0.3614	0.672	3.90841e-22	8.37529e-16	3.78443e-08	Study significant	37	Nose	No	0.97	rs10078545	Segment2	Nose, Maxillary	Yes	MIR3977	intergenic	No	0.162279	0.266893	-0.0898227
rs880264		5	94069803	5q15	C	T	0.37	0.1894	1.18304e-10	2.95121e-06	1.24165e-06	Study significant	24	Glabellar	Yes	0.069	NA	NA	NA	NA	MCTP1	intronic	Yes	0.0476628	0.0334882	0.0153479
rs13182341		5	128107907	5q23.3	C	T	0.2351	0.3168	3.58096e-13	3.63915e-10	0.000114815	Study significant	8	maxillary mouth,maxillary	No	1	rs13182341	Segment6	Mandible, Lower mouth	Yes	FBN2	intergenic	No	0.0104003	0.0284578	-0.0180031
rs6555969		5	171128464	5q35.1	T	C	0.3323	0.302	2.66686e-08	1.96336e-05	0.00011324	Genome-wide significant	24	Glabellar	No	1	rs6555969	Segment56	Glabellar	Yes	FGF18	intergenic	No	-0.000496578	0.024016	-0.0245125
rs6556132		5	173848018	5q35.2	A	G	0.4591	0.3131	4.57088e-09	9.77237e-09	0.031989	Genome-wide significant	3	eye-glabellar-zygoma-temporal	Yes	0.031	NA	NA	NA	NA	MSX2	ncRNA_intronic	No	0.0418289	0.0858948	-0.0431659
rs77646409		6	2145838	6p25.3	T	C	0.1253	0.01733	1.71791e-08	6.53131e-06	0.000293089	Genome-wide significant	4	nose-mouth	Yes	0.069	NA	NA	NA	NA	GMDS	intronic	No	0.0961012	0.0560531	0.0449847
rs13196306		6	2252322	6p25.3	G	A	0.1793	0.1683	1.60694e-08	2.79898e-08	0.0410204	Genome-wide significant	48	Glabellar	No	0.52	rs4959652	Segment7	Eye,Glabellar,Tempora,Zygoma,Forehead	Yes	GMDS	ncRNA_intronic	No	0.000348684	-0.00594931	0.00629806
rs60608799	chr6:2455730	6	2455730	6p25.2	A	AAAG	0.131	0.1188	4.14954e-08	1.83654e-05	0.00022182	Genome-wide significant	48	Glabellar	No	0.154	rs4959652	Segment7	Eye,Glabellar,Tempora,Zygoma,Forehead	Yes	GMDS	intergenic	No	-0.00137221	-0.00377892	0.00240766
rs4714260		6	39536622	6p21.2	C	T	0.3957	0.3923	3.09742e-30	3.76704e-21	5.22396e-11	Study significant	4	mandible,maxillary mouth,nose,maxillary	No	1	rs1520	Segment21	Nose, Maxillary	Yes	KIF6	intronic	No	-0.00166315	0.000860659	-0.00252243
rs13206526		6	44816181	6p21.1	A	C	0.2816	0.2079	7.65597e-30	1.85353e-17	2.52348e-15	Study significant	18	Nose,maxillary	No	0.859	rs35991735	Self-reported nose size	Nose	Yes	SUPT3H;RUNX2	intronic	No	0.0131954	0.0375917	-0.0243084
rs2857487		6	50793671	6p12.3	A	G	0.4599	0.4592	6.30957e-14	1.10408e-07	6.09537e-09	Study significant	37	Nose	No	0.246	rs9381923	Segment22	Nose	Yes	TFAP2B	intronic	No	-0.00120707	0.00702295	-0.0082293
rs9381919		6	50931059	6p12.3	T	G	0.2875	0.1188	2.12814e-13	8.99498e-08	4.98884e-08	Study significant	18	Nose	No	1	rs35965172	Distance between EN and EX	Eye	No	TFAP2B	intergenic	No	0.0967225	0.0797024	0.0220231
rs1886569		6	51038157	6p12.3	A	G	0.3883	0.7401	4.39542e-17	5.32108e-13	8.43335e-06	Study significant	37	Nose	No	0.903	rs9381923	Segment22	Nose	Yes	TFAP2B	intergenic	No	0.245144	0.420337	-0.139109
rs788509		6	51704886	6p12.3	G	A	0.2652	0.5842	7.43019e-10	6.38263e-06	4.75335e-06	Study significant	18	Nose	No	0.932	rs6923760	Segment11	Nose	Yes	PKHD1	intronic	No	0.180147	0.328816	-0.130185
rs28880333		6	85313340	6q14.3	C	A	0.2801	0.08292	7.14496e-11	3.65595e-08	0.000244343	Study significant	6	eye-glabellar-zygoma-temporal	No	0.111	rs112411726	Segment15	Eye,Zygoma,Temporal	Yes	TBX18	intergenic	No	0.13266	0.00252018	0.139804
rs147468294	rs59597672	6	85811665	6q14.3	A	AC	0.3183	0	9.01571e-17	9.59401e-11	4.36516e-08	Study significant	3	Glabellar,Eye,Forehead	No	0.279	rs112411726	Segment15	Eye,Zygoma,Temporal	Yes	TBX18	intergenic	No	0.396942	0.298695	0.207047
rs36126080	rs10944534	6	91998112	6q15	T	TA	0.3492	0.1126	7.36207e-10	7.99834e-09	0.00895365	Study significant	7	Glabellar,Forehead	Yes	0.077	NA	NA	NA	NA	MIR4643	intergenic	Yes	0.148731	-0.00840273	0.16943
rs6568401		6	106188818	6q21	C	T	0.4033	0.2599	2.7227e-10	2.97852e-06	3.95367e-06	Study significant	34	maxillary mouth	No	1	rs6568401	Segment19	Upper mouth	Yes	PRDM1	intergenic	No	0.0411522	-0.0140897	0.0561126
rs73547403		6	113186636	6q21	A	G	0.08993	0.01609	9.54993e-10	5.39511e-10	0.0580764	Study significant	6	eye-glabellar-zygoma-temporal	Yes	0.06	NA	NA	NA	NA	RFPL4B	intergenic	Yes	0.127409	-0.0846748	0.220963
rs6940295		6	127190932	6q22.33	A	G	0.4956	0.4827	1.55955e-16	4.90908e-09	2.13796e-10	Study significant	4	mandible mouth,maxillary mouth,nose	No	0.938	rs9388518	Segment53	Mandible	Yes	RSPO3	intergenic	No	-0.00103944	0.00922501	-0.0102639
rs17062339		6	133639892	6q23.2	A	G	0.1509	0.396	2.38232e-21	4.10204e-11	8.24138e-14	Study significant	12	Glabellar	No	0.807	rs5880172	Forehead morphology	forehead	No	EYA4	intronic	No	0.125199	0.0702785	0.0634803
rs1418341		6	136260450	6q23.3	C	T	0.4968	0.6188	1.2735e-26	1.1885e-18	7.31139e-10	Study significant	12	Glabellar,Eye,Temporal,Forehead	No	0.989	rs34729823	Segment59	Glabellar,Eye,Forehead	Yes	PDE7B	intronic	No	0.0245738	0.125663	-0.100783
rs4895534		6	138871197	6q23.3	T	C	0.4479	0.3131	5.8479e-12	2.53513e-08	2.2182e-05	Study significant	4	Nose	Yes	0.041	NA	NA	NA	NA	NHSL1	intronic	Yes	0.0265257	0.102802	-0.0759179
rs17139675		7	18733748	7p21.1	A	G	0.3044	0.07178	3.54813e-35	9.48418e-25	2.26986e-12	Study significant	37	Nose,Glabellar	No	0.588	rs1178103	Columella inclination	Nose	Yes	HDAC9	intronic	No	0.199803	-0.297951	0.520848
rs1178171		7	18794346	7p21.1	T	A	0.3036	0.7871	5.33335e-18	1.13501e-10	8.66962e-10	Study significant	4	Nose	No	1	rs212672	Segment1	Wholeface	Yes	HDAC9	intronic	No	0.326439	0.113093	0.282084
rs1420150		7	33321872	7p14.3	G	C	0.4121	0.177	6.5013e-11	2.47172e-05	8.51138e-09	Study significant	4	Nose	Yes	0.05	NA	NA	NA	NA	BBS9	intronic	Yes	0.129256	0.200047	-0.0616395
rs1362462		7	34162983	7p14.3	C	T	0.1339	0.2178	2.40436e-08	8.16582e-05	9.7499e-06	Genome-wide significant	34	maxillary mouth	Yes	0.026	NA	NA	NA	NA	BMPER	intronic	Yes	0.0262391	-0.0108561	0.0374456
rs72586392		7	42055499	7p14.1	A	G	0.4364	0.203	1.83231e-09	2.69774e-05	1.47571e-06	Genome-wide significant	9	nose-maxillary	Yes	0.035	NA	NA	NA	NA	GLI3	intronic	No	0.0929706	0.179832	-0.082252
rs28584384		7	81245568	7q21.11	T	C	0.2505	0.1287	2.50035e-35	1.81134e-23	5.09331e-14	Study significant	37	Nose	No	0.589	rs7806852	Segment5	Nose	Yes	HGF	ncRNA_intronic	No	0.0355557	0.00755255	0.0286506
rs11972687		7	81281845	7q21.11	C	T	0.4545	0.0297	2.00447e-22	4.1115e-14	1.45546e-10	Study significant	37	Nose,maxillary	No	0.224	rs7806852	Segment5	Nose	Yes	HGF	ncRNA_intronic	No	0.449249	-0.0397584	0.636231
rs62470051		7	96150233	7q21.3	G	A	0.1089	0.2624	9.4189e-13	8.77001e-10	0.000127057	Study significant	10	mandible	No	0.97	rs4296976	Segment54	Mandible	Yes	DLX5	intronic	No	0.0694758	0.051161	0.0208462
rs12707194		7	134644454	7q33	A	G	0.3428	0.2921	3.28095e-10	3.60579e-09	0.00833681	Study significant	6	eye-glabellar-zygoma-temporal	No	0.936	rs4732070	Segment3	Forehead,Eye,Glabellar,Zygoma,Temporal,Mandible,Lower mouth	Yes	CALD1	intronic	No	0.000642541	0.0133587	-0.012716
rs111847181	rs2929454	8	9087248	8p23.1	G	GAC	0.06812	0.5458	5.28445e-09	4.74242e-07	0.00158125	Genome-wide significant	18	Nose	No	0.933	rs2929451	Self-reported nose size	Nose	Yes	PPP1R3B	intergenic	No	0.424436	0.779472	-0.227068
rs77139634		8	27729914	8p21.1	T	C	0.09212	0	4.3451e-08	1.68267e-05	0.000265461	Genome-wide significant	18	Nose	Yes	0.014	NA	NA	NA	NA	SCARA5	intronic	Yes	0.107733	0.0860739	0.027916
rs7833284		8	60621509	8q12.1	C	A	0.2552	0.008663	3.69828e-13	8.26038e-07	2.15774e-09	Study significant	24	Glabellar	Yes	0.071	NA	NA	NA	NA	CA8	intergenic	Yes	0.279701	-0.0309123	0.359001
rs745578		8	72466324	8q13.3	G	A	0.2532	0.7537	1.10154e-08	0.000154882	8.29851e-07	Genome-wide significant	1	Wholeface	Yes	0.033	NA	NA	NA	NA	EYA1	intergenic	No	0.435352	0.0543153	0.517237
rs6985531		8	77695388	8q21.11	C	T	0.449	0.1708	7.70903e-14	1.47911e-08	2.05116e-07	Study significant	6	Wholeface	Yes	0.07	NA	NA	NA	NA	ZFHX4	intronic	Yes	0.141902	-0.0949959	0.248033
rs10808653		8	93673799	8q22.1	G	C	0.4552	0.00495	7.14496e-11	7.92501e-09	0.0011246	Study significant	37	Nose	Yes	0.061	NA	NA	NA	NA	C8orf83	intergenic	Yes	0.54216	0.377946	0.403289
rs7841749		8	99247467	8q22.2	C	T	0.0617	0.276	9.46237e-09	2.42661e-07	0.00532108	Genome-wide significant	27	Zygoma	No	1	rs139016242	Segment63	Zygoma	Yes	NIPAL2	intronic	No	0.100015	0.157624	-0.0522467
rs12547849		8	100026275	8q22.2	C	T	0.3846	0.1733	3.22107e-61	1.05925e-44	1.61808e-18	Study significant	4	maxillary mouth,nose,maxillary,Glabellar,Eye,Zygoma	No	1	rs11988731	Nose	Nose	Yes	VPS13B	intronic	No	0.127188	0.207342	-0.0713073
rs629334		8	108972019	8q23.1	C	T	0.318	0.3403	4.51856e-08	5.40754e-06	0.00116145	Genome-wide significant	9	nose-maxillary	Yes	0.066	NA	NA	NA	NA	RSPO2	intronic	Yes	0.00383387	0.0911743	-0.0873331
rs6983169		8	109407393	8q23.1	T	C	0.4016	0.3366	1.0666e-13	1.09648e-10	0.000110408	Study significant	36	Nose	No	0.106	rs10089785	Segment10	Nose	Yes	EMC2	intergenic	No	0.0218648	0.0768843	-0.0547769
rs58116396		8	121986318	8q24.12	A	G	0.3051	0.5606	6.5013e-10	1.18304e-06	4.84172e-05	Study significant	9	Nose,maxillary	No	0.989	rs7843236	Segment2	Nose, Maxillary	Yes	SNTB1	intergenic	No	0.0956872	0.104542	-0.00396155
rs7821044		8	123015916	8q24.13	G	C	0.4679	0.1782	2.67917e-08	1.19399e-06	0.0033266	Genome-wide significant	9	nose-maxillary	Yes	0.034	NA	NA	NA	NA	HAS2	intergenic	No	0.207608	0.0976413	0.135058
rs16897057		8	123462066	8q24.13	G	A	0.4167	0.526	3.68129e-09	5.42001e-07	0.000937562	Genome-wide significant	6	eye-glabellar-zygoma-temporal	Yes	0.027	NA	NA	NA	NA	ZHX2	ncRNA_intronic	No	0.0348829	0.0607156	-0.0252098
rs12544443		8	129837463	8q24.21	C	A	0.2514	0.802	1.83231e-10	1.18577e-08	0.00190985	Study significant	4	mouth	No	0.937	rs871502	Segment4	upper mouth	Yes	LINC00976	intergenic	No	0.476683	0.609275	0.038293
rs4495442		8	144333836	8q24.3	T	C	0.1849	0.2525	1.87499e-08	4.50817e-05	1.89234e-05	Genome-wide significant	49	Glabellar	Yes	0.035	NA	NA	NA	NA	ZFP41	intronic	Yes	0.00122911	-0.00791042	0.00914028
rs10814915		9	4290544	9p24.2	T	C	0.4539	0.4653	1.46555e-08	4.06443e-06	0.00044157	Genome-wide significant	3	Glabellar	No	0.959	rs4237150	Self-reported chin dimples	Mandible, Lower mouth, Maxillary,Upper mouth	No	GLIS3	intronic	No	-0.000910385	0.020488	-0.021398
rs7867828		9	14038763	9p23	G	C	0.4327	0.6077	2.28034e-08	1.26183e-05	0.00017338	Genome-wide significant	44	mandible	Yes	0.073	NA	NA	NA	NA	NFIB	intergenic	Yes	0.044644	0.0860152	-0.040344
rs13287985		9	16960741	9p22.2	A	G	0.2153	0.4344	1.43219e-12	7.19449e-09	1.99067e-05	Study significant	9	Nose	No	0.984	rs10962767	Segment2	Nose, Maxillary	Yes	BNC2	intergenic	No	0.0683335	-0.0519405	0.122721
rs7851959		9	20308166	9p21.3	C	G	0.3154	0.006188	1.81134e-34	1.1749e-25	1.09648e-10	Study significant	12	Nose,maxillary,Glabellar,Eye,Zygoma	Yes	0.036	NA	NA	NA	NA	MLLT3	intergenic	Yes	0.335273	-0.236806	0.645185
rs78492399		9	94474621	9q22.31	T	C	0.07877	0.2203	2.62422e-08	0.000212324	1.77828e-06	Genome-wide significant	34	maxillary mouth	No	0.918	rs2230578	Segment2	Nose, Maxillary	Yes	ROR2	intergenic	No	0.0654162	0.0814529	-0.013799
rs2282216		9	97869692	9q22.32	A	G	0.3453	0.5446	3.33426e-09	2.69774e-07	0.0017338	Genome-wide significant	18	Nose	Yes	0.032	NA	NA	NA	NA	FANCC	intronic	Yes	0.0774932	0.00887463	0.0717859
rs75614054		9	98275789	9q22.32	T	C	0.1034	0.1015	5.12861e-09	8.55067e-06	4.28549e-05	Genome-wide significant	1	Wholeface	No	1	rs145965565	Segment44	Nose	Yes	PTCH1	intronic	No	-0.00165854	-0.00185556	0.000198391
rs10817529		9	116642091	9q32	G	A	0.4719	0.3577	1.74985e-10	4.44631e-07	3.47536e-05	Study significant	51	Eye	Yes	0.034	NA	NA	NA	NA	ZNF618	intronic	Yes	0.0206254	-0.0288713	0.0497124
rs200607307	rs1147318	9	125665127	9q33.2	CA	C	0.3499	0.8119	3.60579e-10	1.80717e-07	0.000246037	Study significant	9	maxillary	Yes	0.034	NA	NA	NA	NA	RC3H2	intronic	Yes	0.36138	0.29613	0.152316
rs7871091		9	129559935	9q33.3	G	A	0.4268	0.009901	7.29458e-19	9.2683e-16	5.50808e-05	Study significant	42	mandible,mandible mouth	Yes	0.044	NA	NA	NA	NA	LMX1B	intergenic	No	0.515318	-0.338229	1.06249
rs2122934		10	15519799	10p13	G	A	0.263	0.4097	1.1722e-08	6.56145e-05	4.88652e-06	Genome-wide significant	35	maxillary mouth	Yes	0.033	NA	NA	NA	NA	ITGA8	intergenic	Yes	0.0358113	0.0183946	0.0180737
rs1107307		10	27897769	10p12.1	G	A	0.121	0.2735	3.1989e-08	1.42889e-06	0.00333426	Genome-wide significant	6	eye-glabellar-zygoma-temporal	Yes	0.037	NA	NA	NA	NA	MKX	intergenic	Yes	0.0728975	0.189174	-0.113483
rs4749259		10	27961690	10p12.1	T	C	0.3837	0.06436	3.8815e-29	2.89068e-18	2.81838e-13	Study significant	12	Glabellar,Eye,Temporal,Zygoma,Forehead	Yes	0.023	NA	NA	NA	NA	MKX	downstream	Yes	0.334477	0.370479	0.0367035
rs12258832		10	28010605	10p12.1	A	G	0.2679	0.1077	1.61436e-24	1.34896e-17	9.44061e-09	Study significant	6	Glabellar,Eye,Temporal,Zygoma	Yes	0.031	NA	NA	NA	NA	MKX	intronic	Yes	0.129291	0.133499	0.00494824
rs7899626		10	63825561	10q21.2	T	C	0.4743	0.3478	1.49624e-10	1.7338e-08	0.00111173	Study significant	18	Nose	No	0.235	rs9633535	Segment5	Nose	Yes	ARID5B	intronic	No	0.0198718	0.0517696	-0.0316977
rs1907337		10	78158137	10q22.3	C	T	0.1476	0.854	2.39883e-20	1.04713e-16	1.65959e-05	Study significant	34	maxillary mouth	No	0.982	rs1907342	Segment9	Upper mouth	Yes	C10orf11	intronic	No	0.671563	0.154756	0.958654
rs1093316		10	96108774	10q23.33	C	T	0.3076	0.1609	1.81552e-13	1.48936e-07	1.69434e-08	Study significant	6	Wholeface	Yes	0.056	NA	NA	NA	NA	NOC3L	intronic	Yes	0.0590181	0.10878	-0.0479489
rs544784		10	100452838	10q24.2	C	T	0.3597	0.3515	1.35831e-08	1.21339e-05	9.35406e-05	Genome-wide significant	50	Eye	Yes	0.057	NA	NA	NA	NA	HPSE2	intronic	Yes	-0.00102	0.000398763	-0.00141824
rs12570134		10	119284408	10q26.11	G	T	0.1905	0.08168	1.21339e-42	1.34276e-27	1.93642e-17	Study significant	1	mandible,mandible mouth,nose,maxillary,Glabellar,Eye,Temporal,Zygoma	No	0.986	rs242983	Segment1	Wholeface	Yes	EMX2	ncRNA_intronic	No	0.0762895	-0.00151111	0.0808677
rs3740550		10	119767504	10q26.11	A	G	0.1398	0.006188	6.69885e-43	2.89734e-32	1.43549e-12	Study significant	55	mandible; maxillary mouth,maxillary,Glabellar,Eye,Zygoma	Yes	0.016	NA	NA	NA	NA	RAB11FIP2	UTR3	Yes	0.144516	0.127163	0.0289249
rs1674906		10	127837659	10q26.2	G	A	0.4841	0.001238	9.2045e-09	4.13048e-07	0.00317687	Genome-wide significant	9	nose-maxillary	Yes	0.048	NA	NA	NA	NA	ADAM12	intronic	Yes	0.538819	0.311429	0.462536
rs5789450	chr11:6257310	11	6257310	11p15.4	TG	T	0.2123	0.2438	1.36773e-08	0.000102802	2.66073e-06	Genome-wide significant	62	Forehead	Yes	0.07	NA	NA	NA	NA	FAM160A2	intergenic	Yes	0.00797717	0.0668181	-0.058809
rs7938500		11	16025573	11p15.2	C	T	0.2835	0.007426	3.6141e-12	1.95434e-09	0.000224905	Study significant	36	Nose	No	0.243	rs34121257	Segment7	Eye,Glabellar,Tempora,Zygoma,Forehead	No	SOX6	intronic	No	0.400571	-0.0702375	0.582015
rs7937453		11	44471561	11p11.2	G	A	0.2603	0.6225	8.74984e-09	2.0893e-06	0.00053827	Genome-wide significant	12	eye-glabellar	Yes	0.084	NA	NA	NA	NA	ALX4	intergenic	No	0.220722	0.134589	0.114798
rs34997377	chr11:86634170	11	86634170	11q14.2	CT	C	0.498	0.6708	1.86209e-08	5.94292e-07	0.00450817	Genome-wide significant	34	maxillary mouth	Yes	0.011	NA	NA	NA	NA	FZD4	intergenic	Yes	0.0458169	-0.0425679	0.0894676
rs76482532		11	128236637	11q24.3	A	G	0.1807	0.1114	3.86367e-12	1.65196e-09	0.000283792	Study significant	6	Zygoma	Yes	0.024	NA	NA	NA	NA	ETS1	intergenic	Yes	0.0197207	0.0246793	-0.00476152
rs10771396		12	28100554	12p11.22	A	G	0.1509	0.03837	3.49945e-08	0.000155955	5.19996e-06	Genome-wide significant	18	Nose	Yes	0.024	NA	NA	NA	NA	PTHLH	intergenic	No	0.0762121	0.0796145	-0.000341708
rs10771405		12	28239898	12p11.22	T	C	0.1455	0.3181	1.99986e-12	1.05682e-08	1.84077e-05	Study significant	6	zygoma-temporal	No	1	rs11049359	Segment1	Wholeface	Yes	PTHLH	intergenic	No	0.0919925	-0.0307481	0.127251
rs11049559		12	28525197	12p11.22	A	G	0.3575	0.4356	5.90201e-15	4.19759e-10	1.04472e-06	Study significant	4	Nose	No	0.26	rs11049359	Segment1	Wholeface	Yes	CCDC91	intronic	No	-0.00109254	-0.00347176	0.00237981
rs34599763	rs7963025	12	65843897	12q14.3	T	TA	0.4106	0.08292	8.79023e-24	2.88403e-14	4.4157e-12	Study significant	4	mandible,mandible mouth,maxillary mouth,nose,maxillary,Zygoma	Yes	0.095	NA	NA	NA	NA	MSRB3	intronic	No	-0.00141806	0.00893286	-0.0103499
rs11175885		12	66114630	12q14.3	G	A	0.2939	0.9072	4.61318e-10	0.000138038	4.74242e-09	Study significant	9	Nose	Yes	0.038	NA	NA	NA	NA	RPSAP52	intergenic	Yes	0.583287	-0.29267	1.16803
rs35084099		12	66340703	12q14.3	C	A	0.1511	0.245	3.45939e-14	7.44732e-09	1.94984e-07	Study significant	61	Nose,Forehead	No	0.993	rs11175967	Segment28	Forehead	Yes	HMGA2	intronic	No	0.0201265	0.0431463	-0.0228145
rs7975189		12	66446108	12q14.3	G	C	0.1643	0.3032	2.38781e-08	1.09648e-05	0.000222331	Genome-wide significant	1	Wholeface	No	0.108	rs10743452	Segment7	Eye,Glabellar,Tempora,Zygoma,Forehead	Yes	HMGA2	intergenic	No	0.0655078	0.143081	-0.0753286
rs11116137		12	84356493	12q21.31	A	G	0.3061	0.2822	1.47911e-09	3.59749e-08	0.00498884	Genome-wide significant	4	nose-mouth	Yes	0.045	NA	NA	NA	NA	TMTC2	intergenic	No	-0.000764558	0.0257448	-0.0265091
rs4128162		12	84429631	12q21.31	T	G	0.4755	0.625	2.39332e-08	1.16413e-05	0.000205589	Genome-wide significant	1	Wholeface	No	1	rs4385969	Segment2	Nose, Maxillary	Yes	SLC6A15	intergenic	No	0.0826915	0.0941473	-0.00783584
rs10862968		12	85714770	12q21.31	T	C	0.4833	0.6634	2.38781e-15	3.89045e-12	6.4121e-05	Study significant	34	maxillary mouth	No	0.327	rs11609649	Segment1	Wholeface	Yes	ALX1	intergenic	No	0.0791024	-0.115316	0.197722
rs10862979		12	85787008	12q21.31	A	G	0.4887	0.3985	4.7863e-13	8.26038e-10	6.69885e-05	Study significant	24	Glabellar	No	0.959	rs10779169	Self-reported nose size	Nose	No	ALX1	intergenic	No	0.0510447	-0.0805088	0.132902
rs34034288	rs2158225	12	112768080	12q24.13	CA	C	0.3546	0.9307	1.81552e-08	4.08319e-08	0.0353997	Genome-wide significant	9	nose-maxillary	Yes	0.031	NA	NA	NA	NA	HECTD4	intronic	Yes	0.518788	0.579547	0.1519
rs1317715		12	115418799	12q24.21	T	C	0.2843	0.5433	8.59014e-13	8.10961e-09	9.46237e-06	Study significant	4	Nose	No	1	rs2098990	Segment5	Nose	Yes	TBX3	intergenic	No	0.113917	0.0417693	0.0791754
rs11057528		12	124715164	12q24.31	T	C	0.2394	0.1423	6.71429e-09	1.36773e-05	3.03389e-05	Genome-wide significant	55	Zygoma	Yes	0.039	NA	NA	NA	NA	ZNF664-FAM101A	intronic	Yes	0.0200474	0.0291663	-0.00891524
rs34875425		12	130720444	12q24.33	C	T	0.1379	0.01856	5.99791e-09	1.96336e-05	1.46893e-05	Genome-wide significant	18	Nose	Yes	0.012	NA	NA	NA	NA	FZD10	intergenic	Yes	0.16288	0.156361	0.0214265
rs2253604		13	95364337	13q32.1	T	G	0.3234	0.1597	4.10204e-12	6.68344e-12	0.0193197	Study significant	18	Nose	Yes	0.015	NA	NA	NA	NA	SOX21	UTR5	Yes	0.108427	0.180263	-0.0654953
rs7331308		13	95742383	13q32.1	T	A	0.4978	0.4666	4.54988e-12	5.39511e-08	6.20869e-06	Study significant	18	Nose	Yes	0.023	NA	NA	NA	NA	ABCC4	intronic	Yes	0.00024441	0.0278977	-0.0276533
rs9557284		13	100393276	13q32.3	A	G	0.4079	0.1238	2.98538e-15	2.8119e-10	7.67361e-07	Study significant	12	Glabellar	Yes	0.018	NA	NA	NA	NA	CLYBL	ncRNA_intronic	Yes	0.129084	0.0879829	0.0502269
rs75493661		13	106814040	13q33.2	A	G	0.2683	0.09282	1.1508e-21	8.99498e-15	8.24138e-09	Study significant	37	Nose,Eye	No	1	rs9558696	Segment2	Nose, Maxillary	Yes	LINC00460	intergenic	No	0.0944041	0.130636	-0.0314744
rs12429168		13	110376963	13q34	G	T	0.3278	0.2314	2.86418e-12	6.01174e-10	0.000549541	Study significant	18	Nose	No	1	rs146188897	Self-reported nose size	Nose	Yes	IRS2	intergenic	No	0.00968296	0.0571676	-0.0474374
rs75208169		14	23448918	14q11.2	A	G	0.05815	0	1.01391e-08	2.30675e-06	0.000567545	Genome-wide significant	10	mandible	Yes	0.01	NA	NA	NA	NA	AJUBA	intronic	Yes	0.0807742	0.0628784	0.021345
rs10136118		14	35121086	14q13.1	G	A	0.2196	0.5817	3.8815e-08	6.53131e-07	0.00833681	Genome-wide significant	63	Forehead	Yes	0.03	NA	NA	NA	NA	SNX6	intergenic	Yes	0.192938	-0.0701549	0.28451
rs4901427		14	53964998	14q22.1	T	A	0.2889	0.2958	2.04174e-08	4.47713e-06	0.000580764	Genome-wide significant	37	Nose	Yes	0.06	NA	NA	NA	NA	DDHD1	intergenic	Yes	-0.00156977	-0.00320823	0.00163969
rs34763890		14	54406741	14q22.2	C	T	0.4577	0.63	1.04954e-08	1.34276e-05	5.71479e-05	Genome-wide significant	19	maxillary	No	0.123	rs2224309	Self-reported nose size	Nose	No	BMP4	intergenic	No	0.0867658	0.0226348	0.0681281
rs811156		14	54610759	14q22.2	T	C	0.465	0.823	3.67282e-08	1.11944e-06	0.00485289	Genome-wide significant	12	eye-glabellar	Yes	0.028	NA	NA	NA	NA	BMP4	intergenic	No	0.269677	0.287329	0.0269393
rs1951109		14	61164846	14q23.1	T	C	0.1761	0.03342	7.65597e-13	1.70608e-09	5.09331e-05	Study significant	1	Nose,Zygoma	No	0.121	rs12881623	Segment18	Upper mouth,Nose	Yes	SIX4	intergenic	No	0.109367	-0.231407	0.34723
rs12879559		14	61664530	14q23.1	G	A	0.4961	0.6114	1.37404e-11	6.39735e-08	1.92309e-05	Study significant	9	Nose	Yes	0.034	NA	NA	NA	NA	SIX4	intergenic	Yes	0.0122447	0.0783029	-0.0659826
rs56246022		14	85139058	14q31.3	G	C	0.3207	0.2401	2.64241e-09	7.06318e-09	0.0263633	Genome-wide significant	27	Zygoma	Yes	0.034	NA	NA	NA	NA	SNORD3P3	intergenic	Yes	0.0141815	-0.012692	0.026975
rs58569036		14	98122190	14q32.2	G	A	0.283	0.1844	1.42561e-09	7.60326e-07	0.000219786	Genome-wide significant	18	Nose	Yes	0.028	NA	NA	NA	NA	LINC02291	ncRNA_intronic	Yes	0.0193885	0.0291555	-0.00957655
rs368145116	rs7154456	14	98189192	14q32.2	G	GATAA	0.3281	0.1881	2.08449e-08	7.34514e-08	0.0266073	Genome-wide significant	50	Eye	Yes	0.06	NA	NA	NA	NA	C14orf64	intergenic	No	0.0269246	-0.0404508	0.0677445
rs17096983		14	98935548	14q32.2	T	C	0.1802	0	1.6788e-09	2.04644e-06	7.58578e-05	Genome-wide significant	4	nose-mouth	No	0.306	rs1542448	Segment7	Eye,Glabellar,Tempora,Zygoma,Forehead	No	BCL11B	intergenic	No	0.181611	0.154265	0.0461523
rs147599640		15	26490867	15q12	A	G	0.05122	0	3.53997e-11	3.96278e-09	0.00108143	Study significant	15	Forehead	Yes	0.028	NA	NA	NA	NA	GABRB3	intergenic	Yes	0.104312	0.0830268	0.0271363
rs16961407		15	35973421	15q14	A	G	0.3754	0.09406	4.3451e-13	1.2735e-07	7.70903e-08	Study significant	6	eye-glabellar-zygoma-temporal	Yes	0.063	NA	NA	NA	NA	DPH6-DT	ncRNA_intronic	Yes	0.212821	0.232442	0.00685759
rs12909674		15	36566788	15q14	C	G	0.1731	0.6386	3.2434e-08	2.46604e-05	0.000105439	Genome-wide significant	9	nose-maxillary	No	0.846	rs34961041	Segment31	Tempora,Zygoma	No	C15orf41	intergenic	No	0.376057	0.27568	0.196016
rs79076868		15	37282362	15q14	A	G	0.2737	0.09901	7.21107e-09	4.40555e-07	0.00234423	Genome-wide significant	53	Temporal	Yes	0.027	NA	NA	NA	NA	MEIS2	intronic	Yes	0.0620718	0.0952369	-0.031155
rs78520578		15	48913386	15q21.1	C	G	0.2627	0.001238	2.73527e-08	1.48936e-05	0.00017378	Genome-wide significant	2	downface	Yes	0.021	NA	NA	NA	NA	FBN1	intronic	Yes	0.322979	0.307402	0.0826512
rs58646822		15	62806134	15q22.2	T	C	0.2853	0.25	5.10505e-10	2.25424e-08	0.00281838	Study significant	8	maxillary mouth	Yes	0.022	NA	NA	NA	NA	TLN2	intergenic	Yes	-0.00125114	0.00132097	-0.00257133
rs1387385		15	63269446	15q22.2	T	C	0.2568	0.4121	3.96278e-08	5.52077e-05	3.95367e-05	Genome-wide significant	14	Forehead	Yes	0.03	NA	NA	NA	NA	TPM1	intergenic	Yes	0.047286	-0.0266892	0.0751297
rs2306022		15	68628163	15q23	T	C	0.07353	0.07178	3.26588e-08	9.52796e-07	0.00502343	Genome-wide significant	1	Wholeface	No	1	rs2306022	Segment15	Eye,Zygoma,Temporal	Yes	ITGA11	exonic	No	-0.001619	0.0053304	-0.0069481
rs80039904		15	70194153	15q23	T	C	0.2446	0.001238	1.1695e-08	0.000707946	2.67917e-08	Genome-wide significant	12	eye-glabellar	Yes	0.034	NA	NA	NA	NA	TLE3	intergenic	Yes	0.319995	0.145787	0.239868
rs2278614		15	71748402	15q23	T	C	0.2963	0.1894	2.89734e-11	8.22243e-07	1.35519e-06	Study significant	4	maxillary mouth,nose	No	0.953	rs34430707	Segment2	Nose, Maxillary	Yes	THSD4	intronic	No	0.0137576	0.0569366	-0.0430835
rs34135577	rs12591526	15	71875797	15q23	GT	G	0.2806	0.4121	3.86367e-09	1.07399e-05	2.07014e-05	Genome-wide significant	4	mouth	No	0.604	rs112087864	Segment24	Upper mouth,Zygoma	Yes	THSD4	intronic	No	0.0538181	-0.0371309	0.0924513
rs1542879		15	71925114	15q23	T	G	0.3413	0.5866	2.39332e-26	4.90908e-18	2.89068e-10	Study significant	55	maxillary,Zygoma	Yes	0.036	NA	NA	NA	NA	THSD4	intronic	No	0.099039	0.189943	-0.0856494
rs56186310		15	81466197	15q25.1	T	C	0.07302	0.151	9.14113e-10	1.55597e-06	5.11682e-05	Study significant	18	Nose	Yes	0.02	NA	NA	NA	NA	IL16	intergenic	Yes	0.0164662	0.00393761	0.0126657
rs190690350		16	51081021	16q12.1	G	A	0.2596	0.495	2.208e-08	3.06902e-05	4.45656e-05	Genome-wide significant	52	Temporal	Yes	0.027	NA	NA	NA	NA	SALL1	intergenic	Yes	0.0891509	0.190524	-0.0971457
rs75678295		16	53607096	16q12.2	C	G	0.2983	0.06436	5.02343e-14	2.54097e-10	2.13796e-05	Study significant	37	Nose	No	0.278	rs7404301	Distance between AlL and Ls	Nose, Mouth	Yes	RPGRIP1L	intergenic	No	0.176844	0.20592	-0.0113103
rs113961478		16	53656064	16q12.2	T	C	0.2627	0.2228	1.2106e-13	5.98412e-10	2.16272e-05	Study significant	34	maxillary mouth,nose	No	1	rs9923447	Segment9	Upper mouth	Yes	RPGRIP1L	intronic	No	0.00972425	0.0142037	-0.00443187
rs9934435		16	54819468	16q12.2	T	C	0.3097	0.1856	5.01187e-09	4.36516e-05	2.83792e-06	Genome-wide significant	37	Nose	Yes	0.034	NA	NA	NA	NA	IRX3	intergenic	Yes	0.0930756	0.129989	-0.0322933
rs13329766		16	66624438	16q21	T	C	0.1487	0.04208	5.68853e-09	4.88652e-09	0.0557186	Genome-wide significant	6	eye-glabellar-zygoma-temporal	Yes	0.008	NA	NA	NA	NA	CMTM2	intergenic	Yes	0.0316592	0.0332656	-0.0010944
rs2967237		16	72605586	16q22.2	C	T	0.4249	0.8478	2.25944e-26	4.86407e-17	1.60694e-11	Study significant	18	Nose	Yes	0.045	NA	NA	NA	NA	ZFHX3	ncRNA_intronic	Yes	0.317779	-0.162446	0.544848
rs6499581		16	72696112	16q22.2	A	G	0.2904	0.001238	5.67545e-25	2.69153e-17	1.38995e-09	Study significant	37	maxillary mouth,nose	Yes	0.015	NA	NA	NA	NA	ZFHX3	ncRNA_intronic	Yes	0.3733	0.370032	0.0972556
rs79342471		16	86489844	16q24.1	A	G	0.2647	0.151	2.10378e-19	8.35603e-15	2.39883e-06	Study significant	34	maxillary mouth	No	0.825	rs62051935	Segment19	Upper mouth	Yes	FOXF1	intergenic	No	0.0222008	0.0496658	-0.0272149
rs1078523		17	40912760	17q21.31	A	G	0.4341	0.495	3.45144e-11	2.03236e-07	1.3122e-05	Study significant	55	Zygoma	Yes	0.028	NA	NA	NA	NA	RAMP2-AS1	ncRNA_intronic	Yes	0.00273356	0.0525812	-0.0498439
rs7218433		17	54304717	17q22	G	T	0.3594	0.2364	6.53131e-12	6.71429e-07	2.32274e-07	Study significant	27	Zygoma	No	1	rs7218433	Segment7	Eye,Glabellar,Tempora,Zygoma,Forehead	Yes	ANKFN1	intronic	No	0.0357895	-0.0357973	0.0722429
rs227731		17	54773238	17q22	G	T	0.3413	0.4319	4.87528e-15	9.7051e-12	5.40754e-05	Study significant	34	mandible mouth,maxillary mouth	No	1	rs227727	Segment38	Upper mouth,Lower mouth	Yes	NOG	intergenic	No	0.022062	0.113268	-0.0909589
rs76641259		17	58930159	17q23.2	C	A	0.07201	0.003713	1.22462e-15	6.53131e-14	0.00102094	Study significant	6	Eye,Zygoma	Yes	0.035	NA	NA	NA	NA	BCAS3	intronic	Yes	0.0966037	-0.0414516	0.143046
rs72856781		17	68060451	17q24.3	A	T	0.4643	0.6399	3.14775e-19	1.77828e-13	1.41579e-07	Study significant	3	Zygoma	Yes	0.049	NA	NA	NA	NA	KCNJ16	ncRNA_intronic	Yes	0.0418836	0.140453	-0.0976668
rs34476511	rs41368245	17	68900264	17q24.3	CACTT	C	0.3528	0.1856	7.8886e-16	3.59749e-15	0.00487528	Study significant	37	Nose	Yes	0.021	NA	NA	NA	NA	KCNJ2	intergenic	No	0.0626201	0.0764111	-0.0117444
rs9900242		17	69135631	17q24.3	A	G	0.3903	0.3589	7.6913e-31	3.4914e-24	1.44212e-08	Study significant	18	Nose	No	1	rs9908442	Segment5	Nose	Yes	SOX9	ncRNA_intronic	No	0.00628539	0.0407778	-0.0344726
rs8068343		17	69447706	17q24.3	C	T	0.4993	0.04084	3.31894e-51	4.37522e-37	4.3451e-16	Study significant	18	Nose	Yes	0.046	NA	NA	NA	NA	SOX9	intergenic	No	0.527966	0.469548	0.281156
rs74880650		17	69929414	17q24.3	A	G	0.05882	0	1.8281e-08	1.75388e-05	8.07235e-05	Genome-wide significant	55	Zygoma	No	0.443	rs34091987	Self-reported nose size	Nose	No	SOX9	intergenic	No	0.0673812	0.0518464	0.0179124
rs2193052		17	70026137	17q24.3	G	A	0.4844	0.4728	4.79733e-64	2.20293e-46	1.12202e-19	Study significant	37	Nose	No	0.995	rs2193054	Profile nasal angle and nasal tip protrusion	Nose	Yes	SOX9	upstream	No	-0.00181845	0.00144054	-0.00325734
rs12955754		18	8556126	18p11.22	A	G	0.1033	0.05941	4.1783e-08	1.22744e-05	0.000385478	Genome-wide significant	52	Temporal	Yes	0.018	NA	NA	NA	NA	RAB12	intergenic	Yes	0.0319544	-0.0602983	0.0927744
rs4800986		18	52842438	18q21.2	A	G	0.4018	0.4666	2.48886e-10	1.40929e-09	0.0130317	Study significant	18	Nose	No	1	rs11665450	Segment46	Nose	Yes	TCF4	intergenic	No	0.00535901	0.0350227	-0.0296493
rs73536726		19	30983438	19q12	T	A	0.08536	0.02228	1.11429e-10	8.87156e-07	7.46449e-06	Study significant	24	Glabellar	Yes	0.013	NA	NA	NA	NA	ZNF536	intronic	Yes	0.0486054	-0.0464379	0.0962643
rs7250869		19	33887405	19q13.11	C	T	0.4953	0.6955	7.09578e-11	8.27942e-08	9.68278e-05	Study significant	38	Nose,maxillary	Yes	0.012	NA	NA	NA	NA	PEPD	intronic	Yes	0.125973	0.191511	-0.0568669
rs287104		19	34290995	19q13.11	A	G	0.3046	0.6275	5.95662e-30	1.91867e-21	2.21309e-10	Study significant	37	Nose	No	1	rs287104	Segment5	Nose	Yes	KCTD15	intronic	No	0.175218	0.319394	-0.126758
rs4813837		20	7637098	20p12.3	G	C	0.2574	0.3329	1.31522e-08	1.20226e-05	9.07821e-05	Genome-wide significant	23	mandible	Yes	0.031	NA	NA	NA	NA	HAO1	intergenic	Yes	0.0216768	-0.0277141	0.0496293
rs195800		20	9972308	20p12.2	G	A	0.3798	0.4406	1.95434e-13	1.03992e-07	3.45939e-08	Study significant	37	Nose	No	1	rs116792	Segment11	Nose	Yes	ANKEF1	ncRNA_intronic	No	0.0281086	0.0827861	-0.0542748
rs3761292		20	21679930	20p11.22	T	C	0.202	0.1559	1.1995e-08	2.28034e-06	0.000698232	Genome-wide significant	37	Nose	No	0.466	rs2424390	Nose,mouth	Nose, Mouth	Yes	PAX1	ncRNA_intronic	No	0.00972561	-0.03026	0.0400332
rs73133563		20	21681092	20p11.22	A	G	0.1749	0.01361	1.61808e-09	4.98884e-05	3.76704e-07	Genome-wide significant	9	Nose	No	0.126	rs2424390	Nose,mouth	Nose, Mouth	Yes	PAX1	ncRNA_intronic	No	0.191842	-0.161833	0.374831
rs761891		20	21879108	20p11.22	T	C	0.3788	0.4455	1.52055e-14	8.35603e-09	5.54626e-08	Study significant	1	mandible,Zygoma	No	0.742	rs6047635	Segment11	Nose	No	PAX1	intergenic	No	0.00631047	-0.0197051	0.0260356
rs5840953	rs4813452	20	22277381	20p11.22	A	AT	0.2282	0.4183	8.97429e-12	1.41906e-07	3.89045e-06	Study significant	37	Nose	No	1	rs4813454	Distance between AlL and AlR	Nose	Yes	FOXA2	intergenic	No	0.0720682	-0.00684805	0.0816451
rs10460626		20	38098820	20q12	T	C	0.2366	0.4851	4.4978e-26	8.91251e-20	4.1115e-08	Study significant	9	mandible; maxillary mouth,nose,maxillary,Eye	No	1	rs6028446	Self-reported chin dimples	Mandible, Lower mouth, Maxillary,Upper mouth	Yes	DHX35	intergenic	No	0.121766	0.024209	0.105633
rs6124893		20	45549765	20q13.12	A	G	0.4782	0.09653	5.49541e-09	1.15878e-08	0.0328095	Genome-wide significant	18	Nose	Yes	0.059	NA	NA	NA	NA	EYA2	intronic	Yes	0.340205	0.328196	0.0876298
rs6022644		20	52275147	20q13.2	G	A	0.4206	0.448	7.74462e-09	2.45471e-06	0.000385478	Genome-wide significant	8	Nose	No	0.98	rs6022641	Segment36	Upper mouth,Nose	Yes	ZNF217	intergenic	No	0.00365954	0.0326257	-0.0289595
rs9980535		21	29842250	21q21.3	A	G	0.2551	0.8243	3.99025e-11	4.13048e-07	5.87489e-06	Study significant	37	Nose	Yes	0	NA	NA	NA	NA	LINC00161	intergenic	Yes	0.521359	0.356513	0.380291
rs1004164		21	36447889	21q22.12	A	G	0.4843	0.3156	7.26106e-29	1.88799e-18	1.0666e-12	Study significant	12	Nose,Glabellar,Eye,Zygoma	Yes	0	NA	NA	NA	NA	RUNX1	intergenic	Yes	0.0299751	0.0603351	-0.0299015
rs7281993		21	37072139	21q22.12	C	G	0.3141	0.03465	3.78443e-10	2.0893e-05	2.0893e-07	Study significant	15	Forehead	Yes	0	NA	NA	NA	NA	RUNX1	intergenic	Yes	0.26418	-0.0595614	0.366331
rs61658192	chr23:18096011	23	18096011	Xp22.13	A	G	0.4108	0.05941	3.38065e-14	8.35603e-09	1.60325e-07	Study significant	37	Nose	Yes	0.016	NA	NA	NA	NA	BEND2	ncRNA_intronic	Yes	0.2	NA	NA
rs11795655	chr23:35219939	23	35219939	Xp21.1	T	G	0.07738	0.2669	1.28529e-08	7.87046e-08	0.0172584	Genome-wide significant	36	Nose	Yes	0	NA	NA	NA	NA	FAM47B	intergenic	Yes	NA	NA	NA
rs4354461	chr23:68314619	23	68314619	Xq13.1	T	G	0.1153	0.2507	1.3213e-27	2.54097e-20	4.1115e-09	Study significant	37	Nose	Yes	0	NA	NA	NA	NA	PJA1	intergenic	Yes	NA	NA	NA
rs66535024	chr23:136949354	23	136949354	Xq26.3	C	CGT	0.4886	0.3589	4.06443e-15	4.47713e-11	9.39723e-06	Study significant	3	Zygoma	No	0.982	rs4829906	Segment63	Zygoma	Yes	ZIC3	intergenic	No	NA	NA	NA
								1										*Segment in European study

## Sheet: ST3
Supplementary Table 3. The associated anatomical regions (and segments) of each lead variant
Legend: For each lead variant, the table contains the basic information (rsid, chromosome, position (GRCh37/hg19)), the associated regions (Region-11), whether reaching the genome-wide significant threshold in each region (0: not reaching the threshold; 1: reaching the threshold; each regions are named in seg-region pattern (i.e. 5-underlever-mandible))
RSID	GREGOR	Chr	Pos（hg19)	Annotated Gene	Region-11	5-underlever-mandible	16-32-33mandible mouth	17-34-35maxillary mouth	18-36-37-nose	19-38-39maxillary	24-48-49-glabellar	25-50-51-eye	26-52-53-temporal	27-54-55zygomatic	7-underlevel-forehead	1-Wholeface	2-downface	4-nose-mouth	8-mouth	9-nose-maxillary	3-upface	6-eye-geisome-zygomatic-temporal	12-eye-geisome	13-zygomatic-temporal
rs2377039		1	2803806	TTC34, PRDM16	Forehead	0	0	0	0	0	0	0	0	0	1	0	0	0	0	0	0	0	0	0
rs7516137		1	3253839	PRDM16	Nose	0	0	0	1	0	0	0	0	0	0	0	0	1	0	1	0	0	0	0
rs113365915	rs17036019	1	11002956	CASZ1; C1orf127	Nose	0	0	0	1	0	0	0	0	0	0	0	0	0	0	0	0	0	0	0
rs71631750		1	16083898	FBLIM1	Forehead	0	0	0	0	0	0	0	0	0	1	0	0	0	0	0	0	0	0	0
rs111467622		1	18996519	PAX7	Nose	0	0	0	1	0	0	0	0	0	0	0	0	1	0	1	0	0	0	0
rs4912094		1	19762466	CAPZB	Nose	0	0	0	1	0	0	0	0	0	0	0	0	0	0	1	0	0	0	0
rs72906949		1	53970693	GLIS1	Nose	0	0	0	1	0	0	0	0	0	0	0	0	0	0	0	0	0	0	0
rs3887651		1	53999509	GLIS1	Nose	0	0	0	1	0	0	0	0	0	0	0	0	1	0	1	0	0	0	0
rs2948053		1	54062273	GLIS1	nose-maxillary	0	0	0	0	0	0	0	0	0	0	0	0	1	0	1	0	0	0	0
rs12562360		1	60994215	C1orf87	Nose	0	0	0	1	0	0	0	0	0	0	0	0	0	0	1	0	0	0	0
rs3125927		1	68862622	RPE65	Nose	0	0	0	1	0	0	0	0	0	0	0	0	0	0	0	0	0	0	0
rs6669519		1	75584009	LHX8	Glabellar	0	0	0	0	0	1	0	0	0	0	0	0	0	0	1	0	0	0	0
rs72631743		1	118769603	SPAG17	Eye	0	0	0	0	0	0	1	0	0	0	1	0	0	0	0	1	1	1	0
rs9661038		1	119146085	TBX15	Eye	0	0	0	0	0	0	1	0	0	0	1	0	0	0	0	0	1	0	0
rs10923710		1	119502774	TBX15	mandible,mandible mouth,maxillary mouth,maxillary,Glabellar,Eye,Temporal,Zygoma,Forehead	1	1	1	0	1	1	1	1	1	1	1	1	1	1	1	1	1	1	1
rs1779445		1	119508412	TBX15	Glabellar,Eye,Temporal,Zygoma	0	0	0	0	0	1	1	1	1	0	1	0	1	0	0	1	1	1	1
rs375911694	rs76762554	1	150716112	CTSS	mandible	1	0	0	0	0	0	0	0	0	0	0	1	0	0	0	0	0	0	0
rs1506948		1	165300839	LMX1A	mandible	1	0	0	0	0	0	0	0	0	0	0	0	0	0	0	0	0	0	0
rs2476023		1	197351039	CRB1	mandible,mandible mouth,maxillary mouth	1	1	1	0	0	0	0	0	0	0	1	1	1	1	0	0	0	0	0
rs12042657		1	245378575	KIF26B	Nose	0	0	0	1	0	0	0	0	0	0	0	0	0	0	1	0	0	0	0
rs3856440		2	8721867	ID2	Nose	0	0	0	1	0	0	0	0	0	0	0	0	0	0	0	0	0	0	0
rs6725667		2	19524172	OSR1	maxillary mouth,nose,Eye,Temporal	0	0	1	1	0	0	1	1	0	0	1	0	1	0	1	1	1	1	1
rs2374385		2	42194758	PKDCC	Glabellar	0	0	0	0	0	1	0	0	0	0	0	0	0	0	0	0	0	0	0
rs2342419		2	45269086	SIX2	maxillary mouth,nose	0	0	1	1	0	0	0	0	0	0	0	0	1	1	1	0	0	0	0
rs2009262		2	56012214	EFEMP1	eye-glabellar-zygoma-temporal	0	0	0	0	0	0	0	0	0	0	0	0	0	0	0	1	1	0	0
rs13403156		2	66085159	SPRED2	mandible	1	0	0	0	0	0	0	0	0	0	1	1	1	1	0	1	1	0	1
rs72621585		2	67898936	ETAA1	Zygoma	0	0	0	0	0	0	0	0	1	0	0	0	0	0	0	0	1	0	0
rs1529409		2	71830689	DYSF	maxillary mouth,nose	0	0	1	1	0	0	0	0	0	0	0	0	1	1	1	0	0	0	0
rs6745909		2	104057121	TMEM182	eye-glabellar-zygoma-temporal	0	0	0	0	0	0	0	0	0	0	0	0	0	0	0	0	1	0	0
rs13426125		2	104653581	LOC100287010	zygomatic-temporal	0	0	0	0	0	0	0	0	0	0	0	0	0	0	0	0	0	0	1
rs3827760		2	109513601	EDAR	mandible mouth,Zygoma	0	1	0	0	0	0	0	0	1	0	1	1	1	1	0	0	1	0	0
rs2422241		2	119043036	INSIG2	Glabellar,Eye	0	0	0	0	0	1	1	0	0	0	0	0	0	0	0	1	1	1	0
rs332734		2	119452635	EN1	Eye	0	0	0	0	0	0	1	0	0	0	0	0	0	0	0	1	1	1	0
rs2044473		2	129751723	LOC101927881	maxillary	0	0	0	0	1	0	0	0	0	0	0	0	0	0	0	0	0	0	0
rs72854416		2	145675468	TEX41	Nose,maxillary	0	0	0	1	1	0	0	0	0	0	1	0	1	0	1	0	0	0	0
rs17409597		2	146045060	TEX41	Glabellar	0	0	0	0	0	1	0	0	0	0	0	0	0	0	0	0	0	1	0
rs202205854	rs72862334	2	146586829	TEX41	nose-maxillary	0	0	0	0	0	0	0	0	0	0	0	0	1	0	1	0	0	0	0
rs6718516		2	176991924	HOXD9	Nose,Zygoma	0	0	0	1	0	0	0	0	1	0	1	0	0	0	0	1	1	1	1
rs1524082		2	177111419	MTX2	mandible,mandible mouth,maxillary mouth,nose,maxillary,Glabellar,Eye,Zygoma,Forehead	1	1	1	1	1	1	1	0	1	1	1	1	1	1	1	1	1	1	1
rs12619464		2	177345714	MTX2	mandible,mandible mouth,maxillary mouth	1	1	1	0	0	0	0	0	0	0	1	1	1	1	0	0	0	0	0
rs13408200		2	177368779	MTX2	Nose	0	0	0	1	0	0	0	0	0	0	1	0	1	1	0	0	0	0	0
rs10710424	rs7562843	2	200502849	LINC01877	Nose	0	0	0	0	0	0	0	0	0	0	1	1	0	0	0	0	0	0	0
rs348979		2	222926192	PAX3	Nose	0	0	0	1	0	0	0	0	0	0	0	0	0	0	0	0	0	0	0
rs9288572		2	222962363	PAX3	Nose	0	0	0	1	0	0	0	0	0	0	1	1	1	0	1	0	0	0	0
rs10209141		2	223056368	PAX3	Nose	0	0	0	1	0	0	0	0	0	0	0	0	1	0	1	0	1	0	0
rs111888358	rs34511789	2	223436184	FARSB	Nose	0	0	0	1	0	0	0	0	0	0	0	0	0	0	0	0	0	0	0
rs12614976		2	223542896	MOGAT1	Nose,maxillary,Eye	0	0	0	1	1	0	1	0	0	0	0	1	1	0	1	1	0	0	0
rs12473319		2	232880971	DIS3L2	Glabellar	0	0	0	0	0	1	0	0	0	0	1	0	0	0	0	0	0	1	0
rs2121905		2	239491831	TWIST2	Nose	0	0	0	1	0	0	0	0	0	0	0	0	0	0	0	0	0	0	0
rs116910218		2	239690223	TWIST2	eye-glabellar	0	0	0	0	0	0	0	0	0	0	0	0	0	0	0	0	0	1	0
rs1828554		3	9308332	SRGAP3	Nose	0	0	0	1	0	0	0	0	0	0	0	0	1	0	1	0	0	0	0
rs60889564	rs13353459	3	66896826	KBTBD8	Nose	0	0	0	1	0	0	0	0	0	0	0	0	1	0	1	0	0	0	0
rs10713146	rs9825176	3	71239625	FOXP1	Nose	0	0	0	1	0	0	0	0	0	0	0	0	1	0	1	0	0	0	0
rs36024188		3	86960554	VGLL3	nose-maxillary	0	0	0	0	0	0	0	0	0	0	0	0	1	0	1	0	0	0	0
rs73844434		3	87029924	VGLL3	maxillary	0	0	0	0	1	0	0	0	0	0	0	0	0	0	0	0	0	0	0
rs7431338		3	88880647	EPHA3	Nose	0	0	0	1	0	0	0	0	0	0	0	0	0	0	0	0	0	0	0
rs6765833		3	89035939	EPHA3	Glabellar,Forehead	0	0	0	0	0	1	0	0	0	1	0	0	0	0	0	1	1	0	0
rs4857879		3	128064118	EEFSEC	maxillary mouth,nose	0	0	1	1	0	0	0	0	0	0	0	0	1	1	1	0	0	0	0
rs55686439		3	128201376	GATA2	Nose	0	0	0	1	0	0	0	0	0	0	0	0	0	0	1	0	0	0	0
rs9812461		3	133820689	RYK	maxillary mouth,nose	0	0	1	1	0	0	0	0	0	0	1	1	1	1	1	0	0	0	0
rs111414955	rs67626684	3	138668060	FOXL2	Eye	0	0	0	0	0	0	1	0	0	0	0	0	0	0	0	0	1	1	0
rs72630201		3	138839901	BPESC1	Glabellar,Eye	0	0	0	0	0	1	1	0	0	0	0	0	0	0	0	1	1	1	0
rs12632544		3	138946868	MRPS22	Nose,maxillary,Glabellar,Eye,Temporal,Zygoma,Forehead	0	0	0	1	1	1	1	1	1	1	1	0	1	0	1	1	1	1	1
rs9836369		3	157500853	SHOX2	eye-glabellar-zygoma-temporal	0	0	0	0	0	0	0	0	0	0	0	0	0	0	0	0	1	0	0
rs552757		3	177309024	LINC00578	Glabellar	0	0	0	0	0	1	0	0	0	0	0	0	0	0	0	1	0	0	0
rs12633616		3	184339099	EPHB3	Nose	0	0	0	1	0	0	0	0	0	0	0	1	1	0	1	0	0	0	0
rs9844571		3	184445284	MAGEF1	maxillary	0	0	0	0	1	0	0	0	0	0	0	0	1	0	1	0	0	0	0
rs74921869		4	1005179	FGFRL1	Nose	0	0	0	1	0	0	0	0	0	0	0	0	1	0	1	0	0	0	0
rs371525829		4	4774124	MSX1	Nose	0	0	0	1	0	0	0	0	0	0	0	0	1	0	1	0	0	0	0
rs34998838		4	4794202	MSX1	Nose	0	0	0	1	0	0	0	0	0	0	0	0	1	0	1	0	0	0	0
rs3815181		4	7204493	SORCS2	Glabellar	0	0	0	0	0	1	0	0	0	0	0	0	0	0	0	0	0	0	0
rs7434700		4	8711408	CPZ	Wholeface	0	0	0	0	0	0	0	0	0	0	1	0	0	0	0	0	0	0	0
rs1874285		4	18607550	LCORL	Wholeface	0	0	0	0	0	0	0	0	0	0	1	0	0	0	0	0	0	0	0
rs117922332		4	22394239	ADGRA3	Nose	0	0	0	1	0	0	0	0	0	0	0	0	0	0	0	0	0	0	0
rs60442375		4	42393308	SHISA3	Nose	0	0	0	1	0	0	0	0	0	0	0	0	0	0	0	0	0	0	0
rs2203049		4	61371870	LPHN3	mandible	1	0	0	0	0	0	0	0	0	0	0	0	0	0	0	0	0	0	0
rs6843082		4	111718067	PITX2	maxillary mouth	0	0	1	0	0	0	0	0	0	0	0	0	1	1	0	0	0	0	0
rs326899		4	112672623	PITX2	Nose	0	0	0	1	0	0	0	0	0	0	0	0	0	0	0	0	0	0	0
rs7694450		4	121998104	NDNF	mandible mouth	0	1	0	0	0	0	0	0	0	0	0	0	0	1	0	0	0	0	0
rs200087457	rs10012123	4	126951202	MIR2054	maxillary	0	0	0	0	1	0	0	0	0	0	0	0	0	0	1	0	0	0	0
rs17011824		4	127810815	INTU	Nose	0	0	0	1	0	0	0	0	0	0	0	0	1	0	1	0	0	0	0
rs4834173		4	127983463	INTU	maxillary mouth,nose,Eye	0	0	1	1	0	0	1	0	0	0	0	1	1	0	1	0	0	1	0
rs9995821		4	154828366	SFRP2	maxillary mouth,nose,maxillary	0	0	1	1	1	0	0	0	0	0	1	1	1	1	1	0	0	0	0
rs6834372		4	155204724	DCHS2	eye-glabellar	0	0	0	0	0	0	0	0	0	0	0	0	0	0	0	1	1	1	0
rs6814518		4	174469388	HAND2	mandible,mandible mouth	1	1	0	0	0	0	0	0	0	0	0	0	0	0	0	0	0	0	0
rs17537048		5	1901205	IRX4	Nose	0	0	0	1	0	0	0	0	0	0	0	0	1	0	1	0	0	0	0
rs40646		5	4977136	LINC01020	Eye	0	0	0	0	0	0	1	0	0	0	0	0	0	0	0	0	0	0	0
rs7712213		5	44451269	FGF10	Temporal	0	0	0	0	0	0	0	1	0	0	1	0	0	0	1	1	1	0	1
rs2891934		5	82125335	MIR3977	Nose	0	0	0	1	0	0	0	0	0	0	0	0	1	0	1	0	0	0	0
rs880264		5	94069803	MCTP1	Glabellar	0	0	0	0	0	1	0	0	0	0	0	0	0	0	0	0	1	1	0
rs13182341		5	128107907	FBN2	maxillary mouth,maxillary	0	0	1	0	1	0	0	0	0	0	0	0	0	1	0	0	0	0	0
rs6555969		5	171128464	FGF18	Glabellar	0	0	0	0	0	1	0	0	0	0	0	0	0	0	0	0	0	0	0
rs6556132		5	173848018	MSX2	eye-glabellar-zygoma-temporal	0	0	0	0	0	0	0	0	0	0	0	0	0	0	0	1	1	0	0
rs77646409		6	2145838	GMDS	nose-mouth	0	0	0	0	0	0	0	0	0	0	0	0	1	0	0	0	0	0	0
rs13196306		6	2252322	GMDS	Glabellar	0	0	0	0	0	1	0	0	0	0	0	0	0	0	0	0	0	0	0
rs60608799	chr6:2455730	6	2455730	GMDS	Glabellar	0	0	0	0	0	1	0	0	0	0	0	0	0	0	0	0	0	0	0
rs4714260		6	39536622	KIF6	mandible,maxillary mouth,nose,maxillary	1	0	1	1	1	0	0	0	0	0	1	1	1	1	1	0	0	0	0
rs13206526		6	44816181	SUPT3H;RUNX2	Nose,maxillary	0	0	0	1	1	0	0	0	0	0	1	1	1	0	1	1	1	1	0
rs2857487		6	50793671	TFAP2B	Nose	0	0	0	1	0	0	0	0	0	0	0	0	0	0	0	0	0	0	0
rs9381919		6	50931059	TFAP2B	Nose	0	0	0	1	0	0	0	0	0	0	0	0	0	0	0	0	0	0	0
rs1886569		6	51038157	TFAP2B	Nose	0	0	0	1	0	0	0	0	0	0	0	0	1	0	1	0	0	0	0
rs788509		6	51704886	PKHD1	Nose	0	0	0	1	0	0	0	0	0	0	0	0	0	0	0	0	0	0	0
rs28880333		6	85313340	TBX18	eye-glabellar-zygoma-temporal	0	0	0	0	0	0	0	0	0	0	0	0	0	0	0	1	1	0	0
rs147468294	rs59597672	6	85811665	TBX18	Glabellar,Eye,Forehead	0	0	0	0	0	1	1	0	0	1	1	0	0	0	0	1	1	1	0
rs36126080	rs10944534	6	91998112	MIR4643	Glabellar,Forehead	0	0	0	0	0	1	0	0	0	1	0	0	0	0	0	0	0	0	0
rs6568401		6	106188818	PRDM1	maxillary mouth	0	0	1	0	0	0	0	0	0	0	0	0	0	0	0	0	0	0	0
rs73547403		6	113186636	RFPL4B	eye-glabellar-zygoma-temporal	0	0	0	0	0	0	0	0	0	0	0	0	0	0	0	1	1	0	0
rs6940295		6	127190932	RSPO3	mandible mouth,maxillary mouth,nose	0	1	1	1	0	0	0	0	0	0	0	0	1	1	1	0	0	0	0
rs17062339		6	133639892	EYA4	Glabellar	0	0	0	0	0	1	0	0	0	0	0	0	0	0	0	1	1	1	0
rs1418341		6	136260450	PDE7B	Glabellar,Eye,Temporal,Forehead	0	0	0	0	0	1	1	1	0	1	1	0	0	0	0	1	1	1	1
rs4895534		6	138871197	NHSL1	Nose	0	0	0	1	0	0	0	0	0	0	0	0	1	1	1	0	0	0	0
rs17139675		7	18733748	HDAC9	Nose,Glabellar	0	0	0	1	0	1	0	0	0	0	1	0	1	0	1	1	1	1	0
rs1178171		7	18794346	HDAC9	Nose	0	0	0	1	0	0	0	0	0	0	0	0	1	1	1	0	0	0	0
rs1420150		7	33321872	BBS9	Nose	0	0	0	1	0	0	0	0	0	0	0	1	1	0	1	0	0	0	0
rs1362462		7	34162983	BMPER	maxillary mouth	0	0	1	0	0	0	0	0	0	0	0	0	0	0	0	0	0	0	0
rs72586392		7	42055499	GLI3	nose-maxillary	0	0	0	0	0	0	0	0	0	0	0	0	0	0	1	0	0	0	0
rs28584384		7	81245568	HGF	Nose	0	0	0	1	0	0	0	0	0	0	0	0	1	0	1	0	0	0	0
rs11972687		7	81281845	HGF	Nose,maxillary	0	0	0	1	1	0	0	0	0	0	0	0	1	0	1	0	0	0	0
rs62470051		7	96150233	DLX5	mandible	1	0	0	0	0	0	0	0	0	0	0	1	0	0	0	0	0	0	0
rs12707194		7	134644454	CALD1	eye-glabellar-zygoma-temporal	0	0	0	0	0	0	0	0	0	0	0	0	0	0	0	1	1	0	0
rs111847181	rs2929454	8	9087248	PPP1R3B	Nose	0	0	0	1	0	0	0	0	0	0	0	0	0	0	1	0	0	0	0
rs77139634		8	27729914	SCARA5	Nose	0	0	0	1	0	0	0	0	0	0	0	0	0	0	0	0	0	0	0
rs7833284		8	60621509	CA8	Glabellar	0	0	0	0	0	1	0	0	0	0	0	0	0	0	0	1	0	1	0
rs745578		8	72466324	EYA1	Wholeface	0	0	0	0	0	0	0	0	0	0	1	0	0	0	0	0	0	0	0
rs6985531		8	77695388	ZFHX4	Wholeface	0	0	0	0	0	0	0	0	0	0	1	0	0	0	1	1	1	1	0
rs10808653		8	93673799	C8orf83	Nose	0	0	0	1	0	0	0	0	0	0	0	0	0	0	0	0	0	0	0
rs7841749		8	99247467	NIPAL2	Zygoma	0	0	0	0	0	0	0	0	1	0	0	0	0	0	0	0	0	0	0
rs12547849		8	100026275	VPS13B	maxillary mouth,nose,maxillary,Glabellar,Eye,Zygoma	0	0	1	1	1	1	1	0	1	0	1	1	1	1	1	1	1	1	0
rs629334		8	108972019	RSPO2	nose-maxillary	0	0	0	0	0	0	0	0	0	0	0	0	0	0	1	0	0	0	0
rs6983169		8	109407393	EMC2	Nose	0	0	0	1	0	0	0	0	0	0	1	0	1	0	1	0	0	1	0
rs58116396		8	121986318	SNTB1	Nose,maxillary	0	0	0	1	1	0	0	0	0	0	0	0	1	0	1	0	0	0	0
rs7821044		8	123015916	HAS2	nose-maxillary	0	0	0	0	0	0	0	0	0	0	0	0	0	0	1	0	0	0	0
rs16897057		8	123462066	ZHX2	eye-glabellar-zygoma-temporal	0	0	0	0	0	0	0	0	0	0	0	0	0	0	0	0	1	0	0
rs12544443		8	129837463	LINC00976	mouth	0	0	0	0	0	0	0	0	0	0	0	0	1	1	0	0	0	0	0
rs4495442		8	144333836	ZFP41	Glabellar	0	0	0	0	0	1	0	0	0	0	0	0	0	0	0	0	0	0	0
rs10814915		9	4290544	GLIS3	Glabellar	0	0	0	0	0	1	0	0	0	0	0	0	0	0	0	1	0	0	0
rs7867828		9	14038763	NFIB	mandible	1	0	0	0	0	0	0	0	0	0	0	0	0	0	0	0	0	0	0
rs13287985		9	16960741	BNC2	Nose	0	0	0	1	0	0	0	0	0	0	0	0	1	0	1	0	0	0	0
rs7851959		9	20308166	MLLT3	Nose,maxillary,Glabellar,Eye,Zygoma	0	0	0	1	1	1	1	0	1	0	1	1	1	0	1	1	1	1	1
rs78492399		9	94474621	ROR2	maxillary mouth	0	0	1	0	0	0	0	0	0	0	0	0	0	0	0	0	0	0	0
rs2282216		9	97869692	FANCC	Nose	0	0	0	1	0	0	0	0	0	0	0	0	0	0	0	0	0	0	0
rs75614054		9	98275789	PTCH1	Wholeface	0	0	0	0	0	0	0	0	0	0	1	0	0	0	0	0	0	0	0
rs10817529		9	116642091	ZNF618	Eye	0	0	0	0	0	0	1	0	0	0	0	0	0	0	0	1	0	0	0
rs200607307	rs1147318	9	125665127	RC3H2	maxillary	0	0	0	0	1	0	0	0	0	0	0	0	1	0	1	0	0	0	0
rs7871091		9	129559935	LMX1B	mandible,mandible mouth	1	1	0	0	0	0	0	0	0	0	1	1	0	1	0	0	0	0	0
rs2122934		10	15519799	ITGA8	maxillary mouth	0	0	1	0	0	0	0	0	0	0	0	0	0	0	0	0	0	0	0
rs1107307		10	27897769	MKX	eye-glabellar-zygoma-temporal	0	0	0	0	0	0	0	0	0	0	0	0	0	0	0	0	1	0	0
rs4749259		10	27961690	MKX	Glabellar,Eye,Temporal,Zygoma,Forehead	0	0	0	0	0	1	1	1	1	1	1	0	0	0	0	1	1	1	1
rs12258832		10	28010605	MKX	Glabellar,Eye,Temporal,Zygoma	0	0	0	0	0	1	1	1	1	0	1	0	0	0	0	1	1	1	1
rs7899626		10	63825561	ARID5B	Nose	0	0	0	1	0	0	0	0	0	0	0	0	0	0	0	0	0	0	0
rs1907337		10	78158137	C10orf11	maxillary mouth	0	0	1	0	0	0	0	0	0	0	0	0	0	1	0	0	0	0	0
rs1093316		10	96108774	NOC3L	Wholeface	0	0	0	0	0	0	0	0	0	0	1	0	0	0	0	1	1	0	0
rs544784		10	100452838	HPSE2	Eye	0	0	0	0	0	0	1	0	0	0	0	0	0	0	0	0	0	0	0
rs12570134		10	119284408	EMX2	mandible,mandible mouth,nose,maxillary,Glabellar,Eye,Temporal,Zygoma	1	1	0	1	1	1	1	1	1	0	1	1	1	1	1	1	1	1	1
rs3740550		10	119767504	RAB11FIP2	mandible; maxillary mouth,maxillary,Glabellar,Eye,Zygoma	1	0	1	0	1	1	1	0	1	0	1	1	1	0	1	1	1	1	1
rs1674906		10	127837659	ADAM12	nose-maxillary	0	0	0	0	0	0	0	0	0	0	0	0	0	0	1	0	0	0	0
rs5789450	chr11:6257310	11	6257310	FAM160A2	Forehead	0	0	0	0	0	0	0	0	0	1	0	0	0	0	0	0	0	0	0
rs7938500		11	16025573	SOX6	Nose	0	0	0	1	0	0	0	0	0	0	0	0	0	0	0	0	0	0	0
rs7937453		11	44471561	ALX4	eye-glabellar	0	0	0	0	0	0	0	0	0	0	0	0	0	0	0	0	0	1	0
rs34997377	chr11:86634170	11	86634170	FZD4	maxillary mouth	0	0	1	0	0	0	0	0	0	0	0	0	0	0	0	0	0	0	0
rs76482532		11	128236637	ETS1	Zygoma	0	0	0	0	0	0	0	0	1	0	0	0	0	0	0	1	1	1	1
rs10771396		12	28100554	PTHLH	Nose	0	0	0	1	0	0	0	0	0	0	0	0	0	0	0	0	0	0	0
rs10771405		12	28239898	PTHLH	zygoma-temporal	0	0	0	0	0	0	0	0	0	0	0	0	0	0	0	1	1	0	1
rs11049559		12	28525197	CCDC91	Nose	0	0	0	1	0	0	0	0	0	0	1	1	1	0	1	1	1	1	1
rs34599763	rs7963025	12	65843897	MSRB3	mandible,mandible mouth,maxillary mouth,nose,maxillary,Zygoma	1	1	1	1	1	0	0	0	1	0	1	1	1	1	1	1	1	0	1
rs11175885		12	66114630	RPSAP52	Nose	0	0	0	1	0	0	0	0	0	0	0	0	1	0	1	0	0	0	0
rs35084099		12	66340703	HMGA2	Nose,Forehead	0	0	0	1	0	0	0	0	0	1	1	0	0	0	0	1	0	0	0
rs7975189		12	66446108	HMGA2	Wholeface	0	0	0	0	0	0	0	0	0	0	1	0	0	0	0	0	0	0	0
rs11116137		12	84356493	TMTC2	nose-mouth	0	0	0	0	0	0	0	0	0	0	0	0	1	0	0	0	0	0	0
rs4128162		12	84429631	SLC6A15	Wholeface	0	0	0	0	0	0	0	0	0	0	1	0	0	0	0	0	0	0	0
rs10862968		12	85714770	ALX1	maxillary mouth	0	0	1	0	0	0	0	0	0	0	0	0	1	1	0	0	0	0	0
rs10862979		12	85787008	ALX1	Glabellar	0	0	0	0	0	1	0	0	0	0	0	0	0	0	0	1	1	1	0
rs34034288	rs2158225	12	112768080	HECTD4	nose-maxillary	0	0	0	0	0	0	0	0	0	0	0	0	0	0	1	0	0	0	0
rs1317715		12	115418799	TBX3	Nose	0	0	0	1	0	0	0	0	0	0	0	0	1	0	1	0	0	0	0
rs11057528		12	124715164	ZNF664-FAM101A	Zygoma	0	0	0	0	0	0	0	0	1	0	0	0	0	0	0	0	0	0	0
rs34875425		12	130720444	FZD10	Nose	0	0	0	1	0	0	0	0	0	0	0	0	0	0	0	0	0	0	0
rs2253604		13	95364337	SOX21	Nose	0	0	0	1	0	0	0	0	0	0	0	0	0	0	0	0	0	0	0
rs7331308		13	95742383	ABCC4	Nose	0	0	0	1	0	0	0	0	0	0	0	0	1	0	1	0	0	0	0
rs9557284		13	100393276	CLYBL	Glabellar	0	0	0	0	0	1	0	0	0	0	0	0	0	0	0	1	1	1	0
rs75493661		13	106814040	LINC00460	Nose,Eye	0	0	0	1	0	0	1	0	0	0	0	0	1	0	1	0	0	0	0
rs12429168		13	110376963	IRS2	Nose	0	0	0	1	0	0	0	0	0	0	1	1	1	0	1	0	0	0	0
rs75208169		14	23448918	AJUBA	mandible	1	0	0	0	0	0	0	0	0	0	0	0	0	0	0	0	0	0	0
rs10136118		14	35121086	SNX6	Forehead	0	0	0	0	0	0	0	0	0	1	0	0	0	0	0	0	0	0	0
rs4901427		14	53964998	DDHD1	Nose	0	0	0	1	0	0	0	0	0	0	0	0	0	0	0	0	0	0	0
rs34763890		14	54406741	BMP4	maxillary	0	0	0	0	1	0	0	0	0	0	0	0	0	0	0	0	0	0	0
rs811156		14	54610759	BMP4	eye-glabellar	0	0	0	0	0	0	0	0	0	0	0	0	0	0	0	0	0	1	0
rs1951109		14	61164846	SIX4	Nose,Zygoma	0	0	0	1	0	0	0	0	1	0	1	1	0	0	0	1	1	0	1
rs12879559		14	61664530	SIX4	Nose	0	0	0	1	0	0	0	0	0	0	0	0	0	0	1	0	0	0	0
rs56246022		14	85139058	SNORD3P3	Zygoma	0	0	0	0	0	0	0	0	1	0	0	0	0	0	0	0	0	0	0
rs58569036		14	98122190	LINC02291	Nose	0	0	0	1	0	0	0	0	0	0	0	0	0	0	0	0	0	0	0
rs368145116	rs7154456	14	98189192	C14orf64	Eye	0	0	0	0	0	0	1	0	0	0	0	0	0	0	0	0	0	0	0
rs17096983		14	98935548	BCL11B	nose-mouth	0	0	0	0	0	0	0	0	0	0	0	0	1	0	0	0	0	0	0
rs147599640		15	26490867	GABRB3	Forehead	0	0	0	0	0	0	0	0	0	1	0	0	0	0	0	0	0	0	0
rs16961407		15	35973421	DPH6-DT	eye-glabellar-zygoma-temporal	0	0	0	0	0	0	0	0	0	0	0	0	0	0	0	1	1	1	1
rs12909674		15	36566788	C15orf41	nose-maxillary	0	0	0	0	0	0	0	0	0	0	0	0	0	0	1	0	0	0	0
rs79076868		15	37282362	MEIS2	Temporal	0	0	0	0	0	0	0	1	0	0	0	0	0	0	0	0	1	0	0
rs78520578		15	48913386	FBN1	downface	0	0	0	0	0	0	0	0	0	0	0	1	0	0	0	0	0	0	0
rs58646822		15	62806134	TLN2	maxillary mouth	0	0	1	0	0	0	0	0	0	0	0	0	1	1	0	0	0	0	0
rs1387385		15	63269446	TPM1	Forehead	0	0	0	0	0	0	0	0	0	1	0	0	0	0	0	0	0	0	0
rs2306022		15	68628163	ITGA11	Wholeface	0	0	0	0	0	0	0	0	0	0	1	0	0	0	0	0	0	0	0
rs80039904		15	70194153	TLE3	eye-glabellar	0	0	0	0	0	0	0	0	0	0	0	0	0	0	0	0	0	1	0
rs2278614		15	71748402	THSD4	maxillary mouth,nose	0	0	1	1	0	0	0	0	0	0	1	1	1	1	0	0	0	0	0
rs34135577	rs12591526	15	71875797	THSD4	mouth	0	0	0	0	0	0	0	0	0	0	0	0	1	1	0	0	0	0	0
rs1542879		15	71925114	THSD4	maxillary,Zygoma	0	0	0	0	1	0	0	0	1	0	1	0	1	0	1	1	1	0	1
rs56186310		15	81466197	IL16	Nose	0	0	0	1	0	0	0	0	0	0	0	0	0	0	0	0	0	0	0
rs190690350		16	51081021	SALL1	Temporal	0	0	0	0	0	0	0	1	0	0	0	0	0	0	0	0	0	0	0
rs75678295		16	53607096	RPGRIP1L	Nose	0	0	0	1	0	0	0	0	0	0	0	0	0	0	1	0	0	0	0
rs113961478		16	53656064	RPGRIP1L	maxillary mouth,nose	0	0	1	1	0	0	0	0	0	0	0	0	1	0	1	0	0	0	0
rs9934435		16	54819468	IRX3	Nose	0	0	0	1	0	0	0	0	0	0	0	0	0	0	0	0	0	0	0
rs13329766		16	66624438	CMTM2	eye-glabellar-zygoma-temporal	0	0	0	0	0	0	0	0	0	0	0	0	0	0	0	1	1	0	0
rs2967237		16	72605586	ZFHX3	Nose	0	0	0	1	0	0	0	0	0	0	0	0	1	0	1	0	0	0	0
rs6499581		16	72696112	ZFHX3	maxillary mouth,nose	0	0	1	1	0	0	0	0	0	0	0	0	1	1	1	0	0	0	0
rs79342471		16	86489844	FOXF1	maxillary mouth	0	0	1	0	0	0	0	0	0	0	0	0	0	1	0	0	0	0	0
rs1078523		17	40912760	RAMP2-AS1	Zygoma	0	0	0	0	0	0	0	0	1	0	0	0	0	0	1	0	1	0	0
rs7218433		17	54304717	ANKFN1	Zygoma	0	0	0	0	0	0	0	0	1	0	0	0	0	0	0	0	1	0	1
rs227731		17	54773238	NOG	mandible mouth,maxillary mouth	0	1	1	0	0	0	0	0	0	0	1	1	1	1	0	0	0	0	0
rs76641259		17	58930159	BCAS3	Eye,Zygoma	0	0	0	0	0	0	1	0	1	0	0	0	0	0	0	1	1	1	1
rs72856781		17	68060451	KCNJ16	Zygoma	0	0	0	0	0	0	0	0	1	0	1	0	0	0	0	1	1	0	1
rs34476511	rs41368245	17	68900264	KCNJ2	Nose	0	0	0	1	0	0	0	0	0	0	0	0	1	0	1	0	0	0	0
rs9900242		17	69135631	SOX9	Nose	0	0	0	1	0	0	0	0	0	0	1	1	1	0	1	0	0	0	0
rs8068343		17	69447706	SOX9	Nose	0	0	0	1	0	0	0	0	0	0	1	1	1	0	1	0	0	0	0
rs74880650		17	69929414	SOX9	Zygoma	0	0	0	0	0	0	0	0	1	0	0	0	0	0	0	0	0	0	0
rs2193052		17	70026137	SOX9	Nose	0	0	0	1	0	0	0	0	0	0	0	0	1	0	1	0	0	0	0
rs12955754		18	8556126	RAB12	Temporal	0	0	0	0	0	0	0	1	0	0	0	0	0	0	0	0	0	0	0
rs4800986		18	52842438	TCF4	Nose	0	0	0	1	0	0	0	0	0	0	0	0	1	0	1	0	0	0	0
rs73536726		19	30983438	ZNF536	Glabellar	0	0	0	0	0	1	0	0	0	0	0	0	0	0	0	0	0	0	0
rs7250869		19	33887405	PEPD	Nose,maxillary	0	0	0	1	1	0	0	0	0	0	1	1	1	0	1	0	0	0	0
rs287104		19	34290995	KCTD15	Nose	0	0	0	1	0	0	0	0	0	0	0	0	0	0	1	0	0	0	0
rs4813837		20	7637098	HAO1	mandible	1	0	0	0	0	0	0	0	0	0	0	0	0	0	0	0	0	0	0
rs195800		20	9972308	ANKEF1	Nose	0	0	0	1	0	0	0	0	0	0	0	0	1	0	1	0	0	0	0
rs3761292		20	21679930	PAX1	Nose	0	0	0	1	0	0	0	0	0	0	0	0	0	0	0	0	0	0	0
rs73133563		20	21681092	PAX1	Nose	0	0	0	1	0	0	0	0	0	0	0	0	0	0	1	0	0	0	0
rs761891		20	21879108	PAX1	mandible,Zygoma	1	0	0	0	0	0	0	0	1	0	1	1	1	0	1	1	1	0	1
rs5840953	rs4813452	20	22277381	FOXA2	Nose	0	0	0	1	0	0	0	0	0	0	0	0	0	0	0	0	0	0	0
rs10460626		20	38098820	DHX35	mandible; maxillary mouth,nose,maxillary,Eye	1	0	1	1	1	0	1	0	0	0	1	1	1	1	1	1	1	1	0
rs6124893		20	45549765	EYA2	Nose	0	0	0	1	0	0	0	0	0	0	0	0	0	0	1	0	0	0	0
rs6022644		20	52275147	ZNF217	Nose	0	1	0	0	0	0	0	0	0	0	0	0	0	1	0	0	0	0	0
rs9980535		21	29842250	LINC00161	Nose	0	0	0	1	0	0	0	0	0	0	0	0	0	0	0	0	0	0	0
rs1004164		21	36447889	RUNX1	Nose,Glabellar,Eye,Zygoma	0	0	0	0	0	1	1	0	1	0	1	0	0	0	0	1	1	1	1
rs7281993		21	37072139	RUNX1	Forehead	0	0	0	0	0	0	0	0	0	1	0	0	0	0	0	0	0	0	0
rs61658192	chr23:18096011	23	18096011	BEND2	Nose	0	0	0	1	0	0	0	0	0	0	0	0	1	0	1	0	0	0	0
rs11795655	chr23:35219939	23	35219939	FAM47B	Nose	0	0	0	1	0	0	0	0	0	0	0	0	0	0	0	0	0	0	0
rs4354461	chr23:68314619	23	68314619	PJA1	Nose	0	0	0	1	0	0	0	0	0	0	0	0	1	0	1	0	0	0	0
rs66535024	chr23:136949354	23	136949354	ZIC3	Zygoma	0	0	0	0	0	0	0	0	1	0	0	0	0	0	0	1	1	1	1
Total						20	13	32	107	25	35	29	12	28	16	57	35	87	34	92	54	61	43	28
1 indicated that the variant pass the genome-wide threshold in correspoinding regions (segments)
0 indicated that the variant do not reach the genome-wide threshold in correspoinding regions (segments)

## Sheet: ST4
Supplementary Table 4. The shared and differentiated variants of EAS and EUR study
Legend: The table contains the lead variants of this study and the study of White et al. For each variant, the table contains the basic information (rsid, chromosome, position (GRCh37/hg19), cytogenetic band, and annotated gene, and the study). Next, for each SNP, we caculated the LD (r2) of lead variants of the other study. The SNP with max r2 in the other study are provided (correspoding SNP). …
RSID	Chr	Pos（hg19)	Cytoband	Annotated Gene	population	LD (r2)	correspoding SNP	characteristic	Lowest P	Best Segment	studywide	Lowest P in other population	Best Segment in the other population
rs76244841:2775953:A:G	1	2775953	1p36.32	PRDM16	EUR	0.161577	rs2377039:2803806:C:T	differentiated	1.479e-08	30	FALSE	7.76247e-06	7
rs2377039:2803806:C:T	1	2803806	1p36.32	TTC34	EAS	0.161577	rs76244841:2775953:A:G	differentiated	2.52e-10	30	TRUE	0.00185909	19
rs7516137:3253839:C:G	1	3253839	1p36.32	PRDM16	EAS	1	rs1572037:3254369:T:C	share	9.75e-29	37	TRUE	1.26066e-20	2
rs1572037:3254369:T:C	1	3254369	1p36.32	PRDM16	EUR	1	rs7516137:3253839:C:G	share	2.64292e-22	2	TRUE	1.32434e-27	37
rs113365915:11002956:C:CT	1	11002956	1p36.22	CASZ1, C1orf127	EAS	0	rs76244841:2775953:A:G	differentiated	1.71e-10	37	TRUE	0.000237794	22
rs71631750:16083898:G:C	1	16083898	1p36.21	FBLIM1	EAS	0	rs76244841:2775953:A:G	differentiated	3.65e-08	31	FALSE	0.0018906	18
rs742071:18979874:G:T	1	18979874	1p36.13	PAX7	EUR	0.0592307	rs111467622:18996519:G:A	differentiated	1.07217e-15	11	TRUE	0.0169044	33
rs111467622:18996519:G:A	1	18996519	1p36.13	PAX7	EAS	0.0592307	rs742071:18979874:G:T	differentiated	1.53e-25	37	TRUE	1.52195e-13	44
rs4912082:19716796:T:C	1	19716796	1p36.13	CAPZB	EUR	0.857927	rs4912094:19762466:C:T	share	3.22111e-08	10	FALSE	2.14783e-07	18
rs4912094:19762466:C:T	1	19762466	1p36.13	CAPZB	EAS	0.857927	rs4912082:19716796:T:C	share	1.26e-09	36	FALSE	1.75146e-07	10
rs16834081:31292641:T:C	1	31292641	1p35.2	MATN1	EUR	0	rs2377039:2803806:C:T	differentiated	2.35101e-09	11	FALSE	0.00387258	35
rs72906949:53970693:C:T	1	53970693	1p32.3	GLIS1	EAS	0	rs76244841:2775953:A:G	differentiated	4.55e-09	37	FALSE	0.00295393	63
rs3887651:53999509:C:T	1	53999509	1p32.3	GLIS1	EAS	0	rs76244841:2775953:A:G	differentiated	1.32e-18	37	TRUE	0.00877809	49
rs2948053:54062273:A:G	1	54062273	1p32.3	GLIS1	EAS	0	rs76244841:2775953:A:G	differentiated	3.04e-11	4	TRUE	0.00254507	29
rs35622381:56604984:C:CTG	1	56604984	1p32.2	PLPP3	EUR	0	rs2377039:2803806:C:T	differentiated	1.19611e-11	30	TRUE	0.000175388	1
rs12562360:60994215:A:G	1	60994215	1p32.1	C1orf87	EAS	0.930538	rs4916071:61020499:G:A	share	4.01e-20	37	TRUE	0	11
rs4916071:61020499:G:A	1	61020499	1p32.1	c1orf87	EUR	0.930538	rs12562360:60994215:A:G	share	1.93252e-51	11	TRUE	8.8308e-18	37
rs3125927:68862622:G:A	1	68862622	1p31.3	RPE65	EAS	0	rs76244841:2775953:A:G	differentiated	2.37e-09	37	FALSE	5.72928e-07	2
rs6669519:75584009:T:A	1	75584009	1p31.1	LHX8	EAS	0.00668522	rs79297754:75634995:G:A	differentiated	3.4e-08	9	FALSE	2.03517e-05	61
rs79297754:75634995:G:A	1	75634995	1p31.1	SLC44A5	EUR	0.00668522	rs6669519:75584009:T:A	differentiated	9.68323e-10	61	FALSE	0.000118032	3
rs12070922:81708846:G:A	1	81708846	1p31.1	LPHN2	EUR	0	rs2377039:2803806:C:T	differentiated	3.69509e-09	11	FALSE	5.99791e-05	4
rs72631743:118769603:T:G	1	118769603	1p12	SPAG17	EAS	0.00974139	rs3936018:119682370:T:C	differentiated	1.26e-11	6	TRUE	NA	NA
rs9661038:119146085:G:T	1	119146085	1p12	TBX15	EAS	0.335801	rs7513680:119150968:C:T	share	4.42e-11	1	TRUE	6.38263e-07	51
rs7513680:119150968:C:T	1	119150968	1p12	TBX15	EUR	0.335801	rs9661038:119146085:G:T	share	7.03161e-13	51	TRUE	1.78649e-05	1
rs10923710:119502774:G:T	1	119502774	1p12	TBX15	EAS	0.0974287	rs17023457:119875730:T:C	differentiated	1.2e-44	1	TRUE	3.85213e-36	1
rs1779445:119508412:T:C	1	119508412	1p12	TBX15	EAS	0.100262	rs3936018:119682370:T:C	differentiated	5.01e-21	12	TRUE	0.000505941	7
rs3936018:119682370:T:C	1	119682370	1p12	WARS2	EUR	0.141881	rs9661038:119146085:G:T	differentiated	8.00911e-58	14	TRUE	1.03039e-07	12
rs17023457:119875730:T:C	1	119875730	1p12	WARS2	EUR	0.0974287	rs10923710:119502774:G:T	differentiated	3.25996e-15	48	TRUE	NA	NA
rs375911694:150716112:ATATAT:A	1	150716112	1q21.3	CTSS	EAS	0	rs76244841:2775953:A:G	differentiated	1.3e-10	23	TRUE	NA	NA
rs11589479:155033308:G:A	1	155033308	1q22	ADAM15	EUR	0	rs2377039:2803806:C:T	differentiated	3.88954e-09	1	FALSE	NA	NA
rs1506948:165300839:T:C	1	165300839	1q23.3	LMX1A	EAS	0	rs76244841:2775953:A:G	differentiated	3.53e-09	5	FALSE	0.0304229	44
rs577676:170587340:C:T	1	170587340	1q24.2	PRRX1	EUR	0	rs2377039:2803806:C:T	differentiated	1.08373e-08	51	FALSE	1.52405e-05	19
rs10919462:170734890:A:C	1	170734890	1q24.2	PRRX1	EUR	0	rs2377039:2803806:C:T	differentiated	2.691e-11	9	TRUE	0.00845279	1
rs2476023:197351039:C:G	1	197351039	1q31.3	CRB1	EAS	0.973094	rs2759656:197352969:A:G	share	5.7e-37	21	TRUE	0	1
rs2759656:197352969:A:G	1	197352969	1q31.3	CRB1	EUR	0.973094	rs2476023:197351039:C:G	share	1.16919e-79	53	TRUE	1.24738e-33	21
rs12039502:221197709:G:C	1	221197709	1q41	MARK1	EUR	0	rs2377039:2803806:C:T	differentiated	1.9171e-10	13	TRUE	1.64816e-05	21
rs12042657:245378575:C:A	1	245378575	1q44	KIF26B	EAS	0	rs76244841:2775953:A:G	differentiated	1.95e-13	37	TRUE	NA	NA
rs3856440:8721867:G:A	2	8721867	2p25.1	ID2	EAS	0	rs76244841:2775953:A:G	differentiated	4.06e-08	36	FALSE	0.00117571	31
rs7558413:18721662:G:A	2	18721662	2p24.2	NT5C1B	EUR	0.0129235	rs6725667:19524172:T:G	differentiated	1.25463e-10	1	TRUE	0.000693426	3
rs6715010:19277788:C:T	2	19277788	2p24.1	OSR1	EUR	0.00846608	rs6725667:19524172:T:G	differentiated	1.34486e-14	22	TRUE	0.114025	55
rs79037251:19503015:G:T	2	19503015	2p24.1	OSR1	EUR	0.923094	rs6725667:19524172:T:G	share	9.46093e-11	24	TRUE	2.19786e-21	6
rs6725667:19524172:T:G	2	19524172	2p24.1	OSR1	EAS	0.923094	rs79037251:19503015:G:T	share	1.55e-22	6	TRUE	1.64854e-09	24
rs1427539:19773420:T:C	2	19773420	2p24.1	OSR1	EUR	0.00737673	rs6725667:19524172:T:G	differentiated	2.48497e-09	7	FALSE	0.00170216	36
rs6740960:42181679:A:T	2	42181679	2p21	PKDCC	EUR	0.305385	rs2374385:42194758:G:A	share	3.39101e-36	1	TRUE	0.000442588	21
rs2374385:42194758:G:A	2	42194758	2p21	PKDCC	EAS	0.305385	rs6740960:42181679:A:T	share	9.53e-10	48	TRUE	2.00955e-12	1
rs10189338:42238622:T:C	2	42238622	2p21	PKDCC	EUR	0.220778	rs2374385:42194758:G:A	share	2.48865e-08	11	FALSE	4.88652e-05	48
rs7590268:43540125:T:G	2	43540125	2p21	THADA	EUR	0	rs2377039:2803806:C:T	differentiated	1.14181e-08	29	FALSE	0.00467735	2
rs2342419:45269086:A:G	2	45269086	2p21	SIX2	EAS	0.9722	rs921119:45272812:C:T	share	5.22e-27	37	TRUE	5.04664e-41	36
rs921119:45272812:C:T	2	45272812	2p21	SIX3	EUR	0.9722	rs2342419:45269086:A:G	share	1.41947e-46	36	TRUE	4.67735e-25	37
rs35395759:45350661:C:T	2	45350661	2p21	SIX2	EUR	0.00166057	rs2342419:45269086:A:G	differentiated	3.58892e-10	44	TRUE	4.4157e-05	37
rs2009262:56012214:T:C	2	56012214	2p16.1	EFEMP1	EAS	0.386795	rs1367228:56112440:C:A	share	2.73e-09	3	FALSE	0.00011285	7
rs1367228:56112440:C:A	2	56112440	2p16.1	EFEMP1	EUR	0.386795	rs2009262:56012214:T:C	share	6.36897e-09	30	FALSE	0.000253513	6
rs13035645:60633463:T:A	2	60633463	2p16.1	BCL11A	EUR	0	rs2377039:2803806:C:T	differentiated	2.44473e-08	27	FALSE	0.0125314	5
rs6546175:65976905:T:C	2	65976905	2p14	SPRED2	EUR	0.0171839	rs13403156:66085159:A:G	differentiated	4.75329e-12	58	TRUE	0.000337287	12
rs13403156:66085159:A:G	2	66085159	2p14	SPRED2	EAS	0.0171839	rs6546175:65976905:T:C	differentiated	2.79e-20	1	TRUE	3.40565e-05	51
rs3891585:66756976:A:G	2	66756976	2p14	MEIS1	EUR	0.00081556	rs13403156:66085159:A:G	differentiated	3.78128e-10	15	TRUE	0.000422669	11
rs72621585:67898936:A:G	2	67898936	2p14	ETAA1	EAS	0.303754	rs11675008:67916875:A:G	share	1.38e-09	54	FALSE	5.11799e-06	49
rs11675008:67916875:A:G	2	67916875	2p14	PNO1	EUR	0.303754	rs72621585:67898936:A:G	share	2.77706e-08	49	FALSE	0.00112202	54
rs17655927:71827385:C:T	2	71827385	2p13.2	DYSF	EUR	0.0230052	rs1529409:71830689:T:C	differentiated	2.61226e-09	61	FALSE	0.000408319	35
rs1529409:71830689:T:C	2	71830689	2p13.2	DYSF	EAS	0.0230052	rs17655927:71827385:C:T	differentiated	1.37e-17	4	TRUE	4.61849e-06	46
rs772154:97021664:G:T	2	97021664	2q11.2	NCAPH	EUR	0	rs2377039:2803806:C:T	differentiated	1.3306e-08	21	FALSE	0.0198609	4
rs6745909:104057121:T:A	2	104057121	2q12.1	TMEM182	EAS	0	rs76244841:2775953:A:G	differentiated	2.02e-09	6	FALSE	2.82683e-05	61
rs13426125:104653581:G:T	2	104653581	2q12.1	LOC100287010	EAS	0	rs76244841:2775953:A:G	differentiated	2.91e-09	13	FALSE	0.0075024	24
rs3827760:109513601:A:G	2	109513601	2q12.3	EDAR	EAS	0	rs76244841:2775953:A:G	differentiated	2.17e-13	16	TRUE	NA	NA
rs7597495:112625010:G:T	2	112625010	2q13	FBLN7	EUR	0	rs2377039:2803806:C:T	differentiated	6.49654e-10	25	TRUE	0.0218273	43
rs2422241:119043036:G:A	2	119043036	2q14.2	INSIG2	EAS	1	rs11692600:119046519:T:C	share	4.73e-14	3	TRUE	1.69356e-11	14
rs11692600:119046519:T:C	2	119046519	2q14.2	INSIG2	EUR	1	rs2422241:119043036:G:A	share	1.87709e-12	14	TRUE	8.29851e-13	3
rs332108:119440930:A:C	2	119440930	2q14.2	EN1	EUR	0.780358	rs332734:119452635:T:C	share	5.73045e-12	14	TRUE	6.79204e-05	25
rs332734:119452635:T:C	2	119452635	2q14.2	EN1	EAS	0.780358	rs332108:119440930:A:C	share	3.66e-11	3	TRUE	1.19564e-09	14
rs2044473:129751723:C:T	2	129751723	2q14.3	LOC101927881	EAS	0	rs76244841:2775953:A:G	differentiated	3.43e-08	38	FALSE	0.0543125	38
rs148912137:145658303:C:T	2	145658303	2q22.3	ZEB2	EUR	0.992346	rs72854416:145675468:G:A	share	3.35799e-12	7	TRUE	8.29851e-12	38
rs72854416:145675468:G:A	2	145675468	2q22.3	TEX41	EAS	0.992346	rs148912137:145658303:C:T	share	3.26e-12	38	TRUE	5.91289e-12	1
rs17409597:146045060:T:C	2	146045060	2q22.3	TEX41	EAS	0.156423	rs148912137:145658303:C:T	differentiated	1.54e-13	24	TRUE	0.00049705	5
rs202205854:146586829:TA:T	2	146586829	2q22.3	TEX41	EAS	0.00336565	rs148912137:145658303:C:T	differentiated	8.05e-10	9	TRUE	NA	NA
rs6718516:176991924:G:C	2	176991924	2q31.1	HOXD9	EAS	0.0557953	rs970797:177111819:T:G	differentiated	6.9e-14	6	TRUE	5.21315e-05	4
rs1524082:177111419:A:G	2	177111419	2q31.1	MTX2	EAS	1	rs970797:177111819:T:G	share	1.61e-64	4	TRUE	2.39442e-27	7
rs970797:177111819:T:G	2	177111819	2q31.1	HOXD1	EUR	1	rs1524082:177111419:A:G	share	5.40707e-68	1	TRUE	8.57038e-63	4
rs12619464:177345714:C:T	2	177345714	2q31.1	MTX2	EAS	0.00536675	rs970797:177111819:T:G	differentiated	2.08e-35	42	TRUE	NA	NA
rs10178696:177365619:G:A	2	177365619	2q31.1	MTX2	EUR	0.131949	rs13408200:177368779:C:T	differentiated	2.63872e-11	24	TRUE	7.06318e-05	33
rs13408200:177368779:C:T	2	177368779	2q31.1	MTX2	EAS	0.131949	rs10178696:177365619:G:A	differentiated	2.14e-15	4	TRUE	2.56271e-07	6
rs8176501:188353663:T:G	2	188353663	2q32.1	CALCRL	EUR	0	rs2377039:2803806:C:T	differentiated	4.06413e-09	32	FALSE	0.011995	36
rs13035389:199666111:T:C	2	199666111	2q33.1	SATB2	EUR	0.00342008	rs10710424:200502849:AT:A	differentiated	2.73256e-13	53	TRUE	0.000799834	42
rs4675617:200342749:A:G	2	200342749	2q33.1	SATB2	EUR	0.00230514	rs10710424:200502849:AT:A	differentiated	2.53237e-13	18	TRUE	NA	NA
rs10710424:200502849:AT:A	2	200502849	2q33.1	LINC01877	EAS	0.00342008	rs13035389:199666111:T:C	differentiated	4.96e-11	1	TRUE	NA	NA
rs348979:222926192:C:T	2	222926192	2q36.1	PAX3	EAS	0.043493	rs1370926:223030502:C:G	differentiated	3.74e-08	37	FALSE	2.13157e-13	11
rs9288572:222962363:G:A	2	222962363	2q36.1	PAX3	EAS	0.0136557	rs1370926:223030502:C:G	differentiated	2.75e-23	9	TRUE	2.19634e-10	44
rs1370926:223030502:C:G	2	223030502	2q36.1	PAX3	EUR	0.373799	rs10209141:223056368:A:C	share	6.52493e-62	11	TRUE	0.00151356	63
rs10209141:223056368:A:C	2	223056368	2q36.1	PAX3	EAS	0.373799	rs1370926:223030502:C:G	share	4.02e-11	9	TRUE	0	11
rs111888358:223436184:C:CGAACTCAT	2	223436184	2q36.1	FARSB	EAS	0.0958268	rs7579011:223543633:A:G	differentiated	4.29e-10	18	TRUE	NA	NA
rs12614976:223542896:A:T	2	223542896	2q36.1	MOGAT1	EAS	0.858854	rs7579011:223543633:A:G	share	2.9e-14	9	TRUE	3.82032e-09	2
rs7579011:223543633:A:G	2	223543633	2q36.1	FARSB	EUR	0.858854	rs12614976:223542896:A:T	share	7.09004e-14	2	TRUE	4.52898e-12	4
rs12473319:232880971:G:C	2	232880971	2q37.1	DIS3L2	EAS	0	rs76244841:2775953:A:G	differentiated	1.35e-10	49	TRUE	0.000672512	37
rs2121905:239491831:A:T	2	239491831	2q37.3	TWIST2	EAS	0	rs76244841:2775953:A:G	differentiated	1.36e-12	37	TRUE	0.00163795	11
rs116910218:239690223:A:G	2	239690223	2q37.3	TWIST2	EAS	0	rs76244841:2775953:A:G	differentiated	2.29e-08	12	FALSE	NA	NA
rs1828554:9308332:G:T	3	9308332	3p25.3	SRGAP3	EAS	0.886476	rs4686337:9311215:A:T	share	2.17e-12	9	TRUE	6.7546e-08	45
rs4686337:9311215:A:T	3	9311215	3p25.3	SRGAP3-SETD5	EUR	0.886476	rs1828554:9308332:G:T	share	2.14407e-08	11	FALSE	2.85759e-11	37
rs73048344:24765405:A:G	3	24765405	3p24.2	THRB	EUR	0	rs2377039:2803806:C:T	differentiated	2.96569e-08	15	FALSE	0.00824138	53
rs17054293:54724560:T:A	3	54724560	3p14.3	CACNA2D3	EUR	0	rs2377039:2803806:C:T	differentiated	2.81669e-24	2	TRUE	NA	NA
rs60889564:66896826:GA:G	3	66896826	3p14.1	KBTBD8	EAS	0	rs76244841:2775953:A:G	differentiated	2.06e-15	37	TRUE	0.0130497	57
rs9310211:71231744:G:A	3	71231744	3p13	FOXP1	EUR	0.955398	rs10713146:71239625:CA:C	share	4.64695e-22	23	TRUE	4.9545e-13	18
rs10713146:71239625:CA:C	3	71239625	3p13	FOXP1	EAS	0.955398	rs9310211:71231744:G:A	share	6.4e-15	18	TRUE	NA	NA
rs369191329:86763101:CTAAGA:C	3	86763101	3p12.1	VGLL3	EUR	0.789391	3:86960554:A:AG	share	3.77276e-11	2	TRUE	8.33681e-07	4
3:86960554:A:AG	3	86960554	3p12.1	VGLL3	EAS	0.789391	rs369191329:86763101:CTAAGA:C	share	4.03e-09	4	FALSE	NA	NA
rs73844434:87029924:T:C	3	87029924	3p12.1	VGLL3	EAS	0.0199491	rs369191329:86763101:CTAAGA:C	differentiated	1.13e-08	19	FALSE	NA	NA
rs7431338:88880647:T:C	3	88880647	3p11.1	EPHA3	EAS	0	rs76244841:2775953:A:G	differentiated	8.26e-09	37	FALSE	0.00015787	56
rs6765833:89035939:C:T	3	89035939	3p11.1	EPHA3	EAS	0	rs76244841:2775953:A:G	differentiated	1.32e-09	49	FALSE	8.86951e-06	7
rs34199564:94209591:G:A	3	94209591	3q11.2	ARL13B	EUR	0	rs2377039:2803806:C:T	differentiated	2.24835e-08	30	FALSE	NA	NA
rs793487:99495422:A:C	3	99495422	3q12.1	COL8A1	EUR	0	rs2377039:2803806:C:T	differentiated	2.0081e-08	1	FALSE	0.0311172	38
rs1391361:111257405:T:G	3	111257405	3q13.13	CD96	EUR	0	rs2377039:2803806:C:T	differentiated	3.9361e-08	4	FALSE	0.00151356	37
rs4857879:128064118:A:C	3	128064118	3q21.3	EEFSEC	EAS	0.80428	rs7373685:128107020:A:C	share	3.19e-30	34	TRUE	2.47116e-11	36
rs7373685:128107020:A:C	3	128107020	3q21.3	GATA2	EUR	0.80428	rs4857879:128064118:A:C	share	9.02116e-49	18	TRUE	4.62381e-30	34
rs55686439:128201376:C:A	3	128201376	3q21.3	GATA2	EAS	0.0059295	rs7373685:128107020:A:C	differentiated	2.51e-09	37	FALSE	0.0131553	21
rs9812461:133820689:G:A	3	133820689	3q22.2	RYK	EAS	0.841387	rs6795164:133885925:A:G	share	1.88e-14	4	TRUE	5.95936e-08	43
rs6795164:133885925:A:G	3	133885925	3q22.2	SLCO2A1	EUR	0.841387	rs9812461:133820689:G:A	share	1.43254e-09	1	FALSE	0.013122	61
rs111414955:138668060:C:CAG	3	138668060	3q22.3	FOXL2	EAS	0	rs76244841:2775953:A:G	differentiated	1.52e-12	12	TRUE	NA	NA
rs72630201:138839901:C:T	3	138839901	3q23	BPESC1	EAS	0	rs76244841:2775953:A:G	differentiated	4.12e-13	12	TRUE	0.021424	14
rs12632544:138946868:T:A	3	138946868	3q23	MRPS22	EAS	0	rs76244841:2775953:A:G	differentiated	1.87e-65	3	TRUE	NA	NA
rs792736:157482916:C:G	3	157482916	3q25.32	SHOX2	EUR	0.510646	rs9836369:157500853:C:A	share	1.22774e-16	3	TRUE	3.89045e-05	6
rs9836369:157500853:C:A	3	157500853	3q25.32	SHOX2	EAS	0.510646	rs792736:157482916:C:G	share	9.73e-09	6	FALSE	1.04064e-11	3
rs552757:177309024:G:A	3	177309024	3q26.32	LINC00578	EAS	0	rs76244841:2775953:A:G	differentiated	2.46e-08	49	FALSE	0.00794511	59
rs58022575:184333169:G:GA	3	184333169	3q27.1	EPHB3	EUR	0.990487	rs12633616:184339099:A:T	share	2.83777e-26	5	TRUE	2.2182e-32	37
rs12633616:184339099:A:T	3	184339099	3q27.1	EPHB3	EAS	0.990487	rs58022575:184333169:G:GA	share	1e-34	37	TRUE	6.13479e-25	5
rs56081252:184375948:G:A	3	184375948	3q27.1	EPHB3	EUR	0.0517807	rs9844571:184445284:A:G	differentiated	4.74644e-11	6	TRUE	1.28233e-07	9
rs9844571:184445284:A:G	3	184445284	3q27.1	MAGEF1	EAS	0.0517807	rs56081252:184375948:G:A	differentiated	3.31e-12	4	TRUE	6.36795e-07	24
4:1005179:TGGGGCGGGGCGGGGGCG:T	4	1005179	4p16.3	FGFRL1	EAS	0.924222	rs74921869:1013382:G:A	share	1.63e-13	9	TRUE	NA	NA
rs74921869:1013382:G:A	4	1013382	4p16.3	FGFRL1	EUR	0.924222	4:1005179:TGGGGCGGGGCGGGGGCG:T	share	3.50844e-11	5	TRUE	2.37137e-12	9
rs3910659:4537916:T:G	4	4537916	4p16.2	STX18	EUR	0.0162873	rs371525829:4774124:C:T	differentiated	4.45092e-09	25	FALSE	0.00353183	1
rs371525829:4774124:C:T	4	4774124	4p16.2	MSX1	EAS	0.045686	rs13117653:4805454:G:A	differentiated	1.5e-11	9	TRUE	NA	NA
rs34998838:4794202:C:T	4	4794202	4p16.2	MSX1	EAS	0.794146	rs13117653:4805454:G:A	share	5.92e-15	18	TRUE	4.49158e-18	34
rs13117653:4805454:G:A	4	4805454	4p16.2	MSX1	EUR	0.794146	rs34998838:4794202:C:T	share	4.20039e-18	34	TRUE	0.000289734	18
rs3815181:7204493:T:C	4	7204493	4p16.1	SORCS2	EAS	0	rs76244841:2775953:A:G	differentiated	2.58e-08	48	FALSE	0.000282748	62
rs7434700:8711408:T:A	4	8711408	4p16.1	CPZ	EAS	0	rs76244841:2775953:A:G	differentiated	1.8e-08	1	FALSE	0.000440961	41
rs1874285:18607550:G:T	4	18607550	4p15.31	LCORL	EAS	0	rs76244841:2775953:A:G	differentiated	2.2e-08	1	FALSE	0.00178443	24
rs117922332:22394239:T:G	4	22394239	4p15.2	ADGRA3	EAS	0	rs76244841:2775953:A:G	differentiated	4.86e-08	37	FALSE	NA	NA
rs60442375:42393308:G:A	4	42393308	4p13	SHISA3	EAS	0	rs76244841:2775953:A:G	differentiated	7.87e-09	37	FALSE	0.0290469	9
rs2203049:61371870:T:C	4	61371870	4q13.1	LPHN3	EAS	0	rs76244841:2775953:A:G	differentiated	1.27e-08	41	FALSE	0.00459304	8
rs7674010:109294589:C:T	4	109294589	4q25	LEF1	EUR	0	rs2377039:2803806:C:T	differentiated	4.37412e-08	20	FALSE	0.0282488	24
rs6843082:111718067:G:A	4	111718067	4q25	PITX2	EAS	0.0149841	rs514892:111843671:A:G	differentiated	5.89e-10	34	TRUE	9.29822e-08	37
rs514892:111843671:A:G	4	111843671	4q25	PITX2	EUR	0.0149841	rs6843082:111718067:G:A	differentiated	2.18017e-09	15	FALSE	NA	NA
rs326899:112672623:G:T	4	112672623	4q25	PITX2	EAS	3.41599e-05	rs514892:111843671:A:G	differentiated	1.44e-09	18	FALSE	0.000808537	44
rs7655723:120328666:G:A	4	120328666	4q26	MYOZ2	EUR	0	rs2377039:2803806:C:T	differentiated	8.43704e-09	31	FALSE	0.00683912	47
rs7694450:121998104:A:G	4	121998104	4q27	NDNF	EAS	1	rs7694450:121998104:A:G	share	1.34007e-08	9	FALSE	1.16145e-09	32
rs7694450:121998104:A:G	4	121998104	4q27	PRDM5	EUR	1	rs7694450:121998104:A:G	share	1.16e-09	32	FALSE	1.33998e-08	9
rs6852838:126935475:A:G	4	126935475	4q28.1	FAT4	EUR	0.0414586	rs200087457:126951202:T:TC	differentiated	3.53959e-11	24	TRUE	NA	NA
rs200087457:126951202:T:TC	4	126951202	4q28.1	MIR2054	EAS	0.0414586	rs6852838:126935475:A:G	differentiated	2.19e-09	19	FALSE	7.62255e-07	2
rs17011824:127810815:G:T	4	127810815	4q28.1	INTU	EAS	0.0346088	rs62324070:127928593:G:A	differentiated	6.4e-11	4	TRUE	4.90456e-05	34
rs62324070:127928593:G:A	4	127928593	4q28.1	INTU	EUR	0.919639	rs4834173:127983463:C:G	share	2.82075e-29	2	TRUE	3.70681e-15	9
rs4834173:127983463:C:G	4	127983463	4q28.1	INTU	EAS	0.919639	rs62324070:127928593:G:A	share	1.41e-16	4	TRUE	3.04438e-26	2
rs9995821:154828366:T:C	4	154828366	4q31.3	SFRP2	EAS	1	rs9995821:154828366:T:C	share	5.72076e-65	2	TRUE	6.96627e-90	37
rs9995821:154828366:T:C	4	154828366	4q31.3	DCHS2	EUR	1	rs9995821:154828366:T:C	share	6.97e-90	37	TRUE	0	2
rs6834372:155204724:A:G	4	155204724	4q31.3	DCHS2	EAS	0.0133629	rs9995821:154828366:T:C	differentiated	6.17e-10	6	TRUE	0.00319669	15
rs4342159:169503180:G:A	4	169503180	4q32.3	PALLD	EUR	0	rs2377039:2803806:C:T	differentiated	3.69763e-10	2	TRUE	0.0397192	20
rs4695846:174456858:G:A	4	174456858	4q34.1	HAND2	EUR	0.588649	rs6814518:174469388:C:T	share	1.70765e-19	53	TRUE	1.42561e-07	10
rs6814518:174469388:C:T	4	174469388	4q34.1	HAND2	EAS	0.588649	rs4695846:174456858:G:A	share	9e-09	33	FALSE	3.2719e-14	53
rs3054104:175047506:C:CAT	4	175047506	4q34.1	HPGD	EUR	0.0345928	rs6814518:174469388:C:T	differentiated	3.11476e-21	53	TRUE	0.000412098	41
rs17537048:1901205:A:G	5	1901205	5p15.33	IRX4	EAS	0	rs76244841:2775953:A:G	differentiated	1.09e-17	37	TRUE	2.08257e-08	43
rs40646:4977136:C:T	5	4977136	5p15.32	LINC01020	EAS	0	rs76244841:2775953:A:G	differentiated	4.6e-08	50	FALSE	0.00871967	12
rs7712213:44451269:C:A	5	44451269	5p12	FGF10	EAS	0.9002	rs4866909:44580193:C:A	share	7.16e-14	13	TRUE	6.60694e-08	62
rs4866909:44580193:C:A	5	44580193	5p12	FGF10	EUR	0.9002	rs7712213:44451269:C:A	share	2.3805e-10	62	TRUE	2.95801e-13	13
rs10078545:82124190:A:T	5	82124190	5q14.2	XRCC4	EUR	0.969674	rs2891934:82125335:T:C	share	1.67944e-09	2	FALSE	1.87932e-21	37
rs2891934:82125335:T:C	5	82125335	5q14.2	MIR3977	EAS	0.969674	rs10078545:82124190:A:T	share	3.91e-22	37	TRUE	3.31818e-09	2
rs880264:94069803:T:C	5	94069803	5q15	MCTP1	EAS	0	rs76244841:2775953:A:G	differentiated	1.18e-10	24	TRUE	0.0164551	58
rs76770688:112985673:G:A	5	112985673	5q22.2	MCC	EUR	0	rs2377039:2803806:C:T	differentiated	3.72546e-09	9	FALSE	0.00273527	33
rs13182341:128107907:C:T	5	128107907	5q23.3	FBN2	EAS	1	rs13182341:128107907:C:T	share	3.50845e-15	6	TRUE	3.58096e-13	8
rs13182341:128107907:C:T	5	128107907	5q23.3	FBN	EUR	1	rs13182341:128107907:C:T	share	3.58e-13	8	TRUE	3.50833e-15	6
rs4582322:159509400:G:T	5	159509400	5q33.3	FABP6	EUR	0	rs2377039:2803806:C:T	differentiated	9.51062e-09	5	FALSE	0.000377572	30
rs6555969:171128464:T:C	5	171128464	5q35.1	FGF18	EAS	1	rs6555969:171128464:T:C	share	1.03499e-13	56	FALSE	2.66686e-08	24
rs6555969:171128464:T:C	5	171128464	5q35.1	FGF18	EUR	1	rs6555969:171128464:T:C	share	2.67e-08	24	TRUE	1.0349e-13	56
rs17073930:171190826:A:G	5	171190826	5q35.1	FGF18	EUR	0.0244528	rs6555969:171128464:T:C	differentiated	4.04705e-08	2	FALSE	0.00284446	9
rs6556132:173848018:G:A	5	173848018	5q35.2	MSX2	EAS	0	rs76244841:2775953:A:G	differentiated	4.57e-09	3	FALSE	2.07539e-05	31
rs77646409:2145838:C:T	6	2145838	6p25.3	GMDS	EAS	0.000404785	rs4959652:2386913:G:A	differentiated	1.72e-08	4	FALSE	NA	NA
rs13196306:2252322:A:G	6	2252322	6p25.3	GMDS	EAS	0.520221	rs4959652:2386913:G:A	share	1.61e-08	48	FALSE	0.0722271	22
rs4959652:2386913:G:A	6	2386913	6p25.2	MYLK4	EUR	0.520221	rs13196306:2252322:A:G	share	2.15864e-12	7	TRUE	3.09742e-05	48
rs60608799:2455730:AAAG:A	6	2455730	6p25.2	GMDS	EAS	0.154439	rs4959652:2386913:G:A	differentiated	4.15e-08	48	FALSE	1.0573e-05	56
rs7755467:23557322:C:T	6	23557322	6p22.3	NRSN1	EUR	0	rs2377039:2803806:C:T	differentiated	1.09545e-09	2	FALSE	0.00500035	34
rs9274522:32634373:C:T	6	32634373	6p21.32	COL11A2	EUR	0	rs2377039:2803806:C:T	differentiated	2.16144e-08	62	FALSE	0.049204	60
rs1520:39526867:A:G	6	39526867	6p21.2	DAAM2	EUR	1	rs4714260:39536622:T:C	share	2.27792e-22	21	TRUE	1.11173e-29	4
rs4714260:39536622:T:C	6	39536622	6p21.2	KIF6	EAS	1	rs1520:39526867:A:G	share	3.1e-30	4	TRUE	1.12253e-21	21
rs227832:44681257:T:C	6	44681257	6p21.1	SUPT3H	EUR	0.845588	rs13206526:44816181:C:A	share	3.92729e-37	23	TRUE	7.01455e-28	18
rs13206526:44816181:C:A	6	44816181	6p21.1	SUPT3H,RUNX2	EAS	0.845588	rs227832:44681257:T:C	share	7.66e-30	18	TRUE	4.62382e-30	23
rs73457129:45574050:G:A	6	45574050	6p21.1	RUNX2	EUR	0.00722569	rs13206526:44816181:C:A	differentiated	4.87086e-08	21	FALSE	0.00796159	55
rs12055796:46306547:T:C	6	46306547	6p12.3	RCAN2	EUR	0	rs2377039:2803806:C:T	differentiated	1.54254e-08	22	FALSE	2.84446e-05	9
rs2857487:50793671:A:G	6	50793671	6p12.3	TFAP2B	EAS	0.246331	rs9381923:50985886:C:T	share	6.31e-14	37	TRUE	5.52714e-10	22
rs9381919:50931059:G:T	6	50931059	6p12.3	TFAP2B	EAS	0.10426	rs9381923:50985886:C:T	differentiated	2.13e-13	18	TRUE	0.000143186	8
rs9381923:50985886:C:T	6	50985886	6p12.3	TFAP2B	EUR	0.902594	rs1886569:51038157:A:G	share	7.30063e-19	22	TRUE	4.9545e-16	37
rs1886569:51038157:A:G	6	51038157	6p12.3	TFAP2B	EAS	0.902594	rs9381923:50985886:C:T	share	4.4e-17	37	TRUE	2.52116e-18	22
rs6923760:51685228:G:T	6	51685228	6p12.3	PKHD1	EUR	0.932167	rs788509:51704886:G:A	share	1.02484e-10	11	TRUE	5.16416e-08	18
rs788509:51704886:G:A	6	51704886	6p12.3	PKHD1	EAS	0.932167	rs6923760:51685228:G:T	share	7.43e-10	18	TRUE	4.49883e-05	44
rs4715567:55719867:G:A	6	55719867	6p12.1	BMP5	EUR	0	rs2377039:2803806:C:T	differentiated	1.70882e-08	1	FALSE	0.000120226	38
rs28880333:85313340:C:A	6	85313340	6q14.3	TBX18	EAS	0.0157886	rs112411726:85708585:A:AATGTG	differentiated	7.15e-11	6	TRUE	NA	NA
rs112411726:85708585:A:AATGTG	6	85708585	6q14.3	TBX18	EUR	0.279238	rs147468294:85811665:AC:A	share	1.13078e-09	15	FALSE	3.59749e-10	12
rs147468294:85811665:AC:A	6	85811665	6q14.3	TBX18	EAS	0.279238	rs112411726:85708585:A:AATGTG	share	9.02e-17	3	TRUE	NA	NA
rs36126080:91998112:TA:T	6	91998112	6q15	MIR4643	EAS	0	rs76244841:2775953:A:G	differentiated	7.36e-10	7	TRUE	NA	NA
rs6568401:106188818:C:T	6	106188818	6q21	PRDM1	EAS	1	rs6568401:106188818:C:T	share	4.63567e-08	19	TRUE	2.7227e-10	34
rs6568401:106188818:C:T	6	106188818	6q21	PRDM1	EUR	1	rs6568401:106188818:C:T	share	2.72e-10	34	FALSE	4.63554e-08	19
rs73547403:113186636:G:A	6	113186636	6q21	RFPL4B	EAS	0	rs76244841:2775953:A:G	differentiated	9.55e-10	6	TRUE	NA	NA
rs9388518:127103785:C:A	6	127103785	6q22.33	RSPO3	EUR	0.937869	rs6940295:127190932:A:G	share	3.69816e-21	53	TRUE	1.30317e-14	4
rs6940295:127190932:A:G	6	127190932	6q22.33	RSPO3	EAS	0.937869	rs9388518:127103785:C:A	share	1.56e-16	4	TRUE	7.77141e-16	53
rs519332:133571272:A:G	6	133571272	6q23.2	EYA4	EUR	0.509449	rs17062339:133639892:G:A	share	6.4834e-45	28	TRUE	6.05341e-15	48
rs17062339:133639892:G:A	6	133639892	6q23.2	EYA4	EAS	0.509449	rs519332:133571272:A:G	share	2.38e-21	12	TRUE	6.0534e-30	28
rs1418341:136260450:T:C	6	136260450	6q23.3	PDE7B	EAS	0.988962	rs66665568:136274369:GCT:G	share	1.27e-26	12	TRUE	1.88452e-18	59
rs66665568:136274369:GCT:G	6	136274369	6q23.3	MTFR2	EUR	0.988962	rs1418341:136260450:T:C	share	9.19302e-21	59	TRUE	9.03649e-25	12
rs4895534:138871197:C:T	6	138871197	6q23.3	NHSL1	EAS	0	rs76244841:2775953:A:G	differentiated	5.85e-12	4	TRUE	2.1062e-06	41
rs2108791:7253520:C:T	7	7253520	7p22.1	COL28A1	EUR	0	rs2377039:2803806:C:T	differentiated	2.60082e-08	28	FALSE	2.21309e-05	42
rs17139675:18733748:G:A	7	18733748	7p21.1	HDAC9	EAS	0.0171478	rs212672:18797190:T:A	differentiated	3.55e-35	37	TRUE	2.30781e-05	45
rs1178171:18794346:T:A	7	18794346	7p21.1	HDAC9	EAS	1	rs212672:18797190:T:A	share	5.33e-18	4	TRUE	4.59515e-17	1
rs212672:18797190:T:A	7	18797190	7p21.1	TWIST1	EUR	1	rs1178171:18794346:T:A	share	1.30749e-20	1	TRUE	3.89045e-17	4
rs2465274:27108127:G:A	7	27108127	7p15.2	HOXA2	EUR	0	rs2377039:2803806:C:T	differentiated	4.22214e-09	9	FALSE	0.0297852	41
rs1420150:33321872:C:G	7	33321872	7p14.3	BBS9	EAS	0	rs76244841:2775953:A:G	differentiated	6.5e-11	4	TRUE	0.011995	56
rs1362462:34162983:T:C	7	34162983	7p14.3	BMPER	EAS	0	rs76244841:2775953:A:G	differentiated	2.4e-08	34	FALSE	0.00146757	48
rs72586392:42055499:G:A	7	42055499	7p14.1	GLI3	EAS	0.0187297	rs62443772:42131949:T:A	differentiated	1.83e-09	9	FALSE	9.20661e-11	43
rs62443772:42131949:T:A	7	42131949	7p14.1	GLI3	EUR	0.0187297	rs72586392:42055499:G:A	differentiated	5.34869e-16	22	TRUE	2.36048e-06	18
rs12535551:46677370:A:G	7	46677370	7p12.3	IGFBP3	EUR	0	rs2377039:2803806:C:T	differentiated	4.60395e-11	11	TRUE	5.44503e-05	37
rs7806852:81218318:G:A	7	81218318	7q21.11	HGF	EUR	0.589111	rs28584384:81245568:C:T	share	1.88887e-08	5	FALSE	0.00137404	37
rs28584384:81245568:C:T	7	81245568	7q21.11	HGF	EAS	0.589111	rs7806852:81218318:G:A	share	2.5e-35	37	TRUE	3.32966e-06	22
rs11972687:81281845:C:T	7	81281845	7q21.11	HGF	EAS	0.205599	rs7806852:81218318:G:A	share	2e-22	37	TRUE	0.00701455	22
rs7807002:84296811:G:A	7	84296811	7q21.11	SEMA3A	EUR	0	rs2377039:2803806:C:T	differentiated	3.31883e-10	61	TRUE	0.000261818	21
rs62470051:96150233:A:G	7	96150233	7q21.3	DLX5	EAS	0.970346	rs4296976:96156848:A:C	share	9.42e-13	10	TRUE	0	6
rs4296976:96156848:A:C	7	96156848	7q21.3	DLX6	EUR	0.970346	rs62470051:96150233:A:G	share	7.96953e-74	54	TRUE	6.4121e-12	10
rs884373:120780483:G:T	7	120780483	7q31.31	WNT16	EUR	0	rs2377039:2803806:C:T	differentiated	7.20779e-17	26	TRUE	5.49541e-05	1
rs798682:121987158:A:C	7	121987158	7q31.32	FEZF1	EUR	0	rs2377039:2803806:C:T	differentiated	8.7168e-24	45	TRUE	NA	NA
rs4732070:134624356:G:T	7	134624356	7q33	CALD1	EUR	0.935949	rs12707194:134644454:G:A	share	8.94885e-09	3	FALSE	1.09648e-09	6
rs12707194:134644454:G:A	7	134644454	7q33	CALD1	EAS	0.935949	rs4732070:134624356:G:T	share	3.28e-10	6	TRUE	2.46888e-07	1
rs6948022:137664771:C:T	7	137664771	7q33	DGK1	EUR	0	rs2377039:2803806:C:T	differentiated	6.10668e-09	60	FALSE	NA	NA
rs2976940:8279462:T:G	8	8279462	8p23.1	USP17L8	EUR	0.371806	rs111847181:9087248:GAC:G	share	8.57765e-09	3	FALSE	0.0202768	14
rs12114954:8904862:T:G	8	8904862	8p23.1	PPP1R3B	EUR	0.373912	rs111847181:9087248:GAC:G	share	1.14639e-11	2	TRUE	6.01174e-05	42
rs111847181:9087248:GAC:G	8	9087248	8p23.1	PPP1R3B	EAS	0.404401	rs657913:9882575:G:T	share	5.28e-09	18	FALSE	2.4797e-10	18
rs657913:9882575:G:T	8	9882575	8p23.1	MSRA	EUR	0.404401	rs111847181:9087248:GAC:G	share	3.96362e-10	18	TRUE	0.00391742	60
rs5029306:26453105:T:C	8	26453105	8p21.2	DPYSL2	EUR	0	rs2377039:2803806:C:T	differentiated	5.29279e-10	1	TRUE	4.66659e-05	38
rs77139634:27729914:C:T	8	27729914	8p21.1	SCARA5	EAS	0	rs76244841:2775953:A:G	differentiated	4.35e-08	18	FALSE	NA	NA
rs149814396:41087109:C:T	8	41087109	8p11.21	SFRP1	EUR	0	rs2377039:2803806:C:T	differentiated	2.65144e-08	45	FALSE	0.0264241	46
rs56252175:49445257:GT:G	8	49445257	8q11.21	SNAI2	EUR	0	rs2377039:2803806:C:T	differentiated	1.69431e-09	63	FALSE	0.00266686	12
rs116867275:52584738:A:C	8	52584738	8q11.22	PXDNL	EUR	0	rs2377039:2803806:C:T	differentiated	1.94806e-08	1	FALSE	NA	NA
rs7833284:60621509:A:C	8	60621509	8q12.1	CA8	EAS	0	rs76244841:2775953:A:G	differentiated	3.7e-13	24	TRUE	NA	NA
rs745578:72466324:G:A	8	72466324	8q13.3	EYA1	EAS	0	rs76244841:2775953:A:G	differentiated	1.1e-08	1	FALSE	5.03269e-06	6
rs6985531:77695388:T:C	8	77695388	8q21.11	ZFHX4	EAS	0.0090777	rs1588405:78588654:C:A	differentiated	7.71e-14	6	TRUE	1.08918e-06	48
rs1588405:78588654:C:A	8	78588654	8q21.12	PKIA	EUR	0.0090777	rs6985531:77695388:T:C	differentiated	1.32315e-08	60	FALSE	6.82339e-06	37
rs10808653:93673799:C:G	8	93673799	8q22.1	C8orf83	EAS	0	rs76244841:2775953:A:G	differentiated	7.15e-11	37	TRUE	NA	NA
rs139016242:99244975:T:TA	8	99244975	8q22.2	POP1	EUR	1	rs7841749:99247467:T:C	share	2.85705e-10	63	TRUE	2.84446e-08	55
rs7841749:99247467:T:C	8	99247467	8q22.2	NIPAL2	EAS	1	rs139016242:99244975:T:TA	share	9.46e-09	27	FALSE	2.95393e-10	63
rs12547849:100026275:T:C	8	100026275	8q22.2	VPS13B	EAS	0.757179	rs60373317:100509357:C:A	share	3.22e-61	4	TRUE	4.39036e-09	1
rs60373317:100509357:C:A	8	100509357	8q22.2	VPS13B	EUR	0.757179	rs12547849:100026275:T:C	share	1.96516e-09	1	FALSE	1.74985e-35	4
rs629334:108972019:C:T	8	108972019	8q23.1	RSPO2	EAS	0.00185032	rs10089785:109599969:T:C	differentiated	4.52e-08	9	FALSE	1.56423e-06	45
rs6983169:109407393:T:C	8	109407393	8q23.1	EMC2	EAS	0.105679	rs10089785:109599969:T:C	differentiated	1.07e-13	36	TRUE	5.56417e-11	40
rs10089785:109599969:T:C	8	109599969	8q23.1	TRHR	EUR	0.105679	rs6983169:109407393:T:C	differentiated	2.57831e-08	10	FALSE	0.0210378	55
rs2245221:116624879:G:A	8	116624879	8q23.3	TRPS1	EUR	0	rs2377039:2803806:C:T	differentiated	1.88108e-08	48	FALSE	0.0334195	14
rs11337200:116713794:AT:A	8	116713794	8q23.3	TRPS1	EUR	0	rs2377039:2803806:C:T	differentiated	7.02548e-13	2	TRUE	0.0161065	32
rs7843236:121980512:T:A	8	121980512	8q24.12	SNTB1	EUR	0.988762	rs58116396:121986318:A:G	share	9.54389e-10	2	FALSE	4.50817e-08	9
rs58116396:121986318:A:G	8	121986318	8q24.12	SNTB1	EAS	0.988762	rs7843236:121980512:T:A	share	6.5e-10	9	TRUE	2.64545e-07	5
rs2581548:122256121:G:A	8	122256121	8q24.12	HAS2	EUR	0.0102422	rs7821044:123015916:C:G	differentiated	8.53303e-11	2	TRUE	NA	NA
rs7821044:123015916:C:G	8	123015916	8q24.13	HAS2	EAS	0.0102422	rs2581548:122256121:G:A	differentiated	2.68e-08	9	FALSE	0.000231207	41
rs16897057:123462066:A:G	8	123462066	8q24.13	ZHX2	EAS	0	rs76244841:2775953:A:G	differentiated	3.68e-09	6	FALSE	0.000586408	3
rs12544443:129837463:C:A	8	129837463	8q24.21	LINC00976	EAS	0.937236	rs871502:129863648:C:G	share	1.83e-10	4	TRUE	NA	NA
rs871502:129863648:C:G	8	129863648	8q24.21	CCDC26	EUR	0.937236	rs12544443:129837463:C:A	share	3.32918e-08	4	FALSE	1.51356e-07	4
rs4495442:144333836:T:C	8	144333836	8q24.3	ZFP41	EAS	0	rs76244841:2775953:A:G	differentiated	1.88e-08	49	FALSE	0.000640767	28
rs7859005:1128641:A:G	9	1128641	9p24.3	DMRT2	EUR	0	rs2377039:2803806:C:T	differentiated	2.68612e-10	57	TRUE	0.00413048	30
rs10814915:4290544:T:C	9	4290544	9p24.2	GLIS3	EAS	0.955625	rs10758593:4292083:G:A	share	1.47e-08	3	FALSE	6.78422e-14	3
rs10758593:4292083:G:A	9	4292083	9p24.2	GLIS3	EUR	0.955625	rs10814915:4290544:T:C	share	5.97421e-14	3	TRUE	2.09894e-07	49
rs7867828:14038763:G:C	9	14038763	9p23	NFIB	EAS	0.0125978	rs303751:14480820:G:A	differentiated	2.28e-08	44	FALSE	0.066115	53
rs303751:14480820:G:A	9	14480820	9p22.3	FREM1	EUR	0.0125978	rs7867828:14038763:G:C	differentiated	2.81586e-12	38	TRUE	0.0539511	31
rs10962767:16958463:A:C	9	16958463	9p22.2	BNC2	EUR	0.984156	rs13287985:16960741:G:A	share	5.11659e-14	2	TRUE	2.40436e-12	9
rs13287985:16960741:G:A	9	16960741	9p22.2	BNC2	EAS	0.984156	rs10962767:16958463:A:C	share	1.43e-12	9	TRUE	1.33506e-13	2
rs7851959:20308166:G:C	9	20308166	9p21.3	MLLT3	EAS	0	rs76244841:2775953:A:G	differentiated	1.81e-34	12	TRUE	0.00524324	42
rs78492399:94474621:C:T	9	94474621	9q22.31	ROR2	EAS	0.91758	rs2230578:94485928:C:T	share	2.62e-08	34	FALSE	1.67417e-07	2
rs2230578:94485928:C:T	9	94485928	9q22.31	ROR2	EUR	0.91758	rs78492399:94474621:C:T	share	5.84722e-09	2	FALSE	2.61216e-07	34
rs12553508:96446445:C:T	9	96446445	9q22.31	BARX1	EUR	0	rs2377039:2803806:C:T	differentiated	5.94047e-09	3	FALSE	2.05589e-05	55
rs2282216:97869692:A:G	9	97869692	9q22.32	FANCC	EAS	0.0190165	rs145965565:98273305:T:G	differentiated	3.33e-09	18	FALSE	4.87304e-05	11
rs145965565:98273305:T:G	9	98273305	9q22.32	PTCH1	EUR	1	rs75614054:98275789:C:T	share	1.19827e-14	44	TRUE	2.36592e-08	1
rs75614054:98275789:C:T	9	98275789	9q22.32	PTCH1	EAS	1	rs145965565:98273305:T:G	share	5.13e-09	1	FALSE	5.30273e-14	44
rs1999464:111371123:C:T	9	111371123	9q31.3	ELP1	EUR	0	rs2377039:2803806:C:T	differentiated	1.74018e-34	7	TRUE	0.000159956	6
rs10817529:116642091:A:G	9	116642091	9q32	ZNF618	EAS	0	rs76244841:2775953:A:G	differentiated	1.75e-10	51	TRUE	0.0191911	9
rs200607307:125665127:CA:C	9	125665127	9q33.2	RC3H2	EAS	0	rs76244841:2775953:A:G	differentiated	3.61e-10	9	TRUE	NA	NA
rs10448285:129397014:C:T	9	129397014	9q33.3	LMX1B	EUR	0.0154344	rs7871091:129559935:A:G	differentiated	1.3793e-10	57	TRUE	2.69774e-07	3
rs7871091:129559935:A:G	9	129559935	9q33.3	LMX1B	EAS	0.0154344	rs10448285:129397014:C:T	differentiated	7.3e-19	42	TRUE	NA	NA
rs2122934:15519799:G:A	10	15519799	10p13	ITGA8	EAS	0	rs76244841:2775953:A:G	differentiated	1.17e-08	35	FALSE	7.41822e-05	25
rs1107307:27897769:A:G	10	27897769	10p12.1	MKX	EAS	0	rs76244841:2775953:A:G	differentiated	3.2e-08	6	FALSE	0.0109698	42
rs4749259:27961690:C:T	10	27961690	10p12.1	MKX	EAS	0	rs76244841:2775953:A:G	differentiated	3.88e-29	12	TRUE	0.001166	61
rs12258832:28010605:G:A	10	28010605	10p12.1	MKX	EAS	0	rs76244841:2775953:A:G	differentiated	1.61e-24	6	TRUE	2.10669e-06	3
rs1902713:48442078:C:T	10	48442078	10q11.22	GDF10	EUR	0	rs2377039:2803806:C:T	differentiated	1.77744e-08	20	FALSE	0.00363915	18
rs7899626:63825561:C:T	10	63825561	10q21.2	ARID5B	EAS	0.235034	rs9633535:63836088:C:T	share	1.5e-10	18	TRUE	0.000393731	22
rs9633535:63836088:C:T	10	63836088	10q21.2	ARID5B	EUR	0.235034	rs7899626:63825561:C:T	share	4.32814e-11	5	TRUE	1.1298e-05	2
rs138458666:76358087:TA:T	10	76358087	10q22.2	KAT6B	EUR	0	rs2377039:2803806:C:T	differentiated	7.49936e-09	2	FALSE	0.0629506	45
rs1907337:78158137:T:C	10	78158137	10q22.3	C10orf11	EAS	0.981831	rs1907342:78163768:G:A	share	2.4e-20	34	TRUE	6.42096e-15	9
rs1907342:78163768:G:A	10	78163768	10q22.3	C10orf11	EUR	0.981831	rs1907337:78158137:T:C	share	6.27909e-19	9	TRUE	2.57632e-18	34
rs1093316:96108774:T:C	10	96108774	10q23.33	NOC3L	EAS	0	rs76244841:2775953:A:G	differentiated	1.82e-13	6	TRUE	0.00376964	61
rs1536446:97259560:A:G	10	97259560	10q24.1	TCTN3	EUR	0	rs2377039:2803806:C:T	differentiated	3.99945e-08	45	FALSE	NA	NA
rs544784:100452838:T:C	10	100452838	10q24.2	HPSE2	EAS	0	rs76244841:2775953:A:G	differentiated	1.36e-08	50	FALSE	0.0298745	24
rs11190970:103128332:G:A	10	103128332	10q24.32	FGF8	EUR	0	rs2377039:2803806:C:T	differentiated	7.47321e-09	45	FALSE	0.0125603	22
rs242983:119276361:A:G	10	119276361	10q26.11	EMX2	EUR	0.986437	rs12570134:119284408:T:G	share	1.84622e-20	1	TRUE	4.00867e-40	1
rs12570134:119284408:T:G	10	119284408	10q26.11	EMX2OS	EAS	0.986437	rs242983:119276361:A:G	share	1.21e-42	1	TRUE	8.3946e-17	1
rs34988394:119738984:C:T	10	119738984	10q26.11	EMX2	EUR	0.0160972	rs3740550:119767504:G:A	differentiated	5.46352e-14	62	TRUE	0.0116145	5
rs3740550:119767504:G:A	10	119767504	10q26.11	RAB11FIP2	EAS	0.0160972	rs34988394:119738984:C:T	differentiated	6.7e-43	55	TRUE	NA	NA
rs1696840:123343909:T:G	10	123343909	10q26.13	FGFR2	EUR	0	rs2377039:2803806:C:T	differentiated	2.8286e-08	34	FALSE	0.00125603	5
rs1674906:127837659:G:A	10	127837659	10q26.2	ADAM12	EAS	0	rs76244841:2775953:A:G	differentiated	9.2e-09	9	FALSE	NA	NA
rs6578283:2673575:G:A	11	2673575	11p15.5	KCNQ1	EUR	0	rs2377039:2803806:C:T	differentiated	2.53498e-10	9	TRUE	1.10154e-06	8
rs5789450:6257310:TG:T	11	6257310	11p15.4	FAM160A2	EAS	0	rs76244841:2775953:A:G	differentiated	1.37e-08	62	FALSE	0.0359749	44
rs7938500:16025573:T:C	11	16025573	11p15.2	SOX6	EAS	0.242691	rs34121257:16224877:G:GA	share	3.61e-12	36	TRUE	NA	NA
rs34121257:16224877:G:GA	11	16224877	11p15.1	SOX6	EUR	0.242691	rs7938500:16025573:T:C	share	1.08582e-08	7	FALSE	0.000192752	36
rs7121535:44336938:C:T	11	44336938	11p11.2	ALX4	EUR	0.0107296	rs7937453:44471561:G:A	differentiated	4.7054e-09	1	FALSE	5.45758e-07	18
rs10838269:44378010:T:C	11	44378010	11p11.2	ALX4	EUR	0.0838538	rs7937453:44471561:G:A	differentiated	8.93248e-15	30	TRUE	1.40281e-06	25
rs7937453:44471561:G:A	11	44471561	11p11.2	ALX4	EAS	0.0838538	rs10838269:44378010:T:C	differentiated	8.75e-09	12	FALSE	0.0444939	24
rs34997377:86634170:CT:C	11	86634170	11q14.2	FZD4	EAS	0	rs76244841:2775953:A:G	differentiated	1.86e-08	34	FALSE	NA	NA
rs76482532:128236637:G:A	11	128236637	11q24.3	ETS1	EAS	0	rs76244841:2775953:A:G	differentiated	3.86e-12	6	TRUE	0.00062431	21
rs10743452:8841413:G:A	12	8841413	12p13.31	A2ML1	EUR	0	rs2377039:2803806:C:T	differentiated	4.73068e-08	7	FALSE	6.39735e-05	53
rs10771396:28100554:G:A	12	28100554	12p11.22	PTHLH	EAS	0.00244159	rs11049359:28279773:T:C	differentiated	3.5e-08	18	FALSE	0.00164021	40
rs10771405:28239898:C:T	12	28239898	12p11.22	PTHLH	EAS	0.681096	rs11049359:28279773:T:C	share	2e-12	6	TRUE	1.56964e-11	2
rs11049359:28279773:T:C	12	28279773	12p11.22	PTHLH	EUR	0.681096	rs10771405:28239898:C:T	share	4.24633e-19	1	TRUE	1.32739e-05	6
rs11049559:28525197:G:A	12	28525197	12p11.22	CCDC91	EAS	0.259557	rs11049359:28279773:T:C	share	5.9e-15	4	TRUE	2.89734e-10	1
rs7970054:59314712:T:C	12	59314712	12q14.1	LRIG3	EUR	0	rs2377039:2803806:C:T	differentiated	6.56322e-11	7	TRUE	0.00576766	48
rs34599763:65843897:TA:T	12	65843897	12q14.3	MSRB3	EAS	0.0953676	rs60493340:65856151:T:G	differentiated	8.79e-24	4	TRUE	NA	NA
rs60493340:65856151:T:G	12	65856151	12q14.3	WIF1	EUR	0.0953676	rs34599763:65843897:TA:T	differentiated	4.00117e-19	3	TRUE	9.24698e-20	1
rs11175885:66114630:A:G	12	66114630	12q14.3	RPSAP52	EAS	0.00810203	rs60493340:65856151:T:G	differentiated	4.61e-10	9	TRUE	5.91834e-06	44
rs11175967:66321344:C:G	12	66321344	12q14.3	HMGA2	EUR	0.99273	rs35084099:66340703:A:C	share	2.14985e-15	28	TRUE	5.61048e-13	61
rs35084099:66340703:A:C	12	66340703	12q14.3	HMGA2	EAS	0.99273	rs11175967:66321344:C:G	share	3.46e-14	61	TRUE	7.4302e-15	28
rs7975189:66446108:C:G	12	66446108	12q14.3	HMGA2	EAS	0.0414786	rs11175967:66321344:C:G	differentiated	2.39e-08	1	FALSE	2.0347e-09	1
rs2695152:77927796:A:G	12	77927796	12q21.2	NAV3	EUR	0	rs2377039:2803806:C:T	differentiated	1.28054e-08	35	FALSE	0.00205116	2
rs10160931:78216016:T:G	12	78216016	12q21.2	NAV3	EUR	0	rs2377039:2803806:C:T	differentiated	8.83252e-14	13	TRUE	0.00489779	11
rs58687115:84199728:C:CT	12	84199728	12q21.31	gene desert	EUR	0.0241106	rs11116137:84356493:G:A	differentiated	5.33652e-11	12	TRUE	0.0237684	17
rs11116137:84356493:G:A	12	84356493	12q21.31	TMTC2	EAS	0.0322923	rs4385969:84395428:G:A	differentiated	1.48e-09	4	FALSE	0.000821864	58
rs4385969:84395428:G:A	12	84395428	12q21.31	SLC6A15	EUR	1	rs4128162:84429631:T:G	share	2.48969e-11	2	TRUE	6.95024e-08	37
rs4128162:84429631:T:G	12	84429631	12q21.31	SLC6A15	EAS	1	rs4385969:84395428:G:A	share	2.39e-08	1	FALSE	8.18843e-11	2
rs11609649:85576492:G:A	12	85576492	12q21.31	ALX1	EUR	0.327386	rs10862968:85714770:C:T	share	6.57385e-29	1	TRUE	NA	NA
rs10862968:85714770:C:T	12	85714770	12q21.31	ALX1	EAS	0.327386	rs11609649:85576492:G:A	share	2.39e-15	34	TRUE	2.93901e-21	1
rs10862979:85787008:G:A	12	85787008	12q21.31	ALX1	EAS	0.110279	rs10779162:85881917:G:T	differentiated	4.79e-13	24	TRUE	1.18795e-07	9
rs10779162:85881917:G:T	12	85881917	12q21.31	ALX1	EUR	0.110279	rs10862979:85787008:G:A	differentiated	4.12902e-17	9	TRUE	1.93197e-07	4
rs34034288:112768080:CA:C	12	112768080	12q24.13	HECTD4	EAS	0	rs76244841:2775953:A:G	differentiated	1.82e-08	9	FALSE	NA	NA
rs1317715:115418799:T:C	12	115418799	12q24.21	TBX3	EAS	1	rs2098990:115419855:C:A	share	8.59e-13	4	TRUE	3.64754e-24	5
rs2098990:115419855:C:A	12	115419855	12q24.21	TBX3	EUR	1	rs1317715:115418799:T:C	share	6.69962e-25	5	TRUE	3.47536e-12	4
rs11057528:124715164:C:T	12	124715164	12q24.31	ZNF664-FAM101A	EAS	0	rs76244841:2775953:A:G	differentiated	6.71e-09	55	FALSE	0.00342216	41
rs34875425:130720444:T:C	12	130720444	12q24.33	FZD10	EAS	0	rs76244841:2775953:A:G	differentiated	6e-09	18	FALSE	NA	NA
rs66516258:80489124:TTA:T	13	80489124	13q31.1	SPRY2	EUR	0	rs2377039:2803806:C:T	differentiated	1.25178e-09	11	FALSE	0.00416869	37
rs2253604:95364337:T:G	13	95364337	13q32.1	SOX21	EAS	0.00876718	rs9524742:95650055:C:T	differentiated	4.1e-12	18	TRUE	0.0002319	18
rs11842203:95508654:A:G	13	95508654	13q32.1	TGDS-SOX21	EUR	0.00283166	rs7331308:95742383:A:T	differentiated	7.20749e-11	5	TRUE	NA	NA
rs9524742:95650055:C:T	13	95650055	13q32.1	TGDS-SOX21	EUR	0.00883833	rs7331308:95742383:A:T	differentiated	3.05526e-15	1	TRUE	5.33335e-06	33
rs7331308:95742383:A:T	13	95742383	13q32.1	ABCC4	EAS	0.00883833	rs9524742:95650055:C:T	differentiated	4.55e-12	18	TRUE	3.48578e-06	34
rs9557284:100393276:G:A	13	100393276	13q32.3	CLYBL	EAS	0.00338557	rs2390383:100974098:A:C	differentiated	2.99e-15	12	TRUE	3.36977e-06	7
rs2390383:100974098:A:C	13	100974098	13q32.3	PCCA	EUR	0.00338557	rs9557284:100393276:G:A	differentiated	1.99307e-08	14	FALSE	0.00323594	13
rs75493661:106814040:G:A	13	106814040	13q33.2	LINC00460	EAS	1	rs9558696:106821580:C:T	share	1.15e-21	37	TRUE	5.88844e-09	2
rs9558696:106821580:C:T	13	106821580	13q33.2	EFNB2	EUR	1	rs75493661:106814040:G:A	share	9.59865e-10	2	FALSE	1.69044e-21	37
rs1411551:110373035:T:A	13	110373035	13q34	IRS2	EUR	1	rs12429168:110376963:T:G	share	3.7995e-12	20	TRUE	1.49279e-11	18
rs12429168:110376963:T:G	13	110376963	13q34	IRS2	EAS	1	rs1411551:110373035:T:A	share	2.86e-12	18	TRUE	4.61424e-11	20
rs75208169:23448918:G:A	14	23448918	14q11.2	AJUBA	EAS	0	rs76244841:2775953:A:G	differentiated	1.01e-08	10	FALSE	NA	NA
rs10136118:35121086:G:A	14	35121086	14q13.1	SNX6	EAS	0	rs76244841:2775953:A:G	differentiated	3.88e-08	63	FALSE	0.0528324	26
rs35798215:37513151:T:C	14	37513151	14q13.3	PAX9	EUR	0	rs2377039:2803806:C:T	differentiated	7.466e-09	1	FALSE	0.0139959	34
rs4901427:53964998:A:T	14	53964998	14q22.1	DDHD1	EAS	0.0121942	rs12878658:54077802:G:A	differentiated	2.04e-08	37	FALSE	5.66631e-08	22
rs12878658:54077802:G:A	14	54077802	14q22.1	BMP4	EUR	0.0121942	rs4901427:53964998:A:T	differentiated	4.59746e-09	11	FALSE	0.0338844	50
rs34763890:54406741:C:T	14	54406741	14q22.2	BMP4	EAS	0.000937174	rs12878658:54077802:G:A	differentiated	1.05e-08	19	FALSE	0.0083946	62
rs811156:54610759:T:C	14	54610759	14q22.2	BMP4	EAS	0.00326949	rs12878658:54077802:G:A	differentiated	3.67e-08	12	FALSE	0.00339469	20
rs10047930:59461017:C:T	14	59461017	14q23.1	DACT1	EUR	0	rs2377039:2803806:C:T	differentiated	1.61809e-08	53	FALSE	0.181552	37
rs1951109:61164846:T:C	14	61164846	14q23.1	SIX4	EAS	0.121305	rs12881623:61564837:C:T	differentiated	7.66e-13	1	TRUE	5.44252e-05	53
rs12881623:61564837:C:T	14	61564837	14q23.1	SIX1	EUR	0.121305	rs1951109:61164846:T:C	differentiated	1.02514e-09	18	FALSE	0.000120504	23
rs12879559:61664530:G:A	14	61664530	14q23.1	SIX4	EAS	0.0154789	rs12881623:61564837:C:T	differentiated	1.37e-11	9	TRUE	0.000128263	7
rs12890110:68781595:C:T	14	68781595	14q24.1	RAD51B	EUR	0	rs2377039:2803806:C:T	differentiated	2.17204e-09	17	FALSE	0.00152055	2
rs56246022:85139058:C:G	14	85139058	14q31.3	SNORD3P3	EAS	0	rs76244841:2775953:A:G	differentiated	2.64e-09	27	FALSE	0.00419083	38
rs58569036:98122190:A:G	14	98122190	14q32.2	LINC02291	EAS	0.0115999	rs76810699:99018688:G:A	differentiated	1.43e-09	18	FALSE	0.00302343	61
rs368145116:98189192:GATAA:G	14	98189192	14q32.2	C14orf64	EAS	0.00230617	rs76810699:99018688:G:A	differentiated	2.08e-08	50	FALSE	7.98179e-05	4
rs1542448:98873074:A:G	14	98873074	14q32.2	BCL11B	EUR	0.306044	rs17096983:98935548:C:T	share	1.48589e-13	7	TRUE	8.97429e-05	6
rs17096983:98935548:C:T	14	98935548	14q32.2	BCL11B	EAS	0.306044	rs1542448:98873074:A:G	share	1.68e-09	4	FALSE	NA	NA
rs76810699:99018688:G:A	14	99018688	14q32.2	BCL11B	EUR	0.0115999	rs58569036:98122190:A:G	differentiated	2.54425e-09	1	FALSE	0.000394457	55
rs1257585:99521392:A:C	14	99521392	14q32.2	BCL11B	EUR	0.0146012	rs17096983:98935548:C:T	differentiated	7.37462e-11	56	TRUE	5.59758e-06	12
rs147599640:26490867:G:A	15	26490867	15q12	GABRB3	EAS	0	rs76244841:2775953:A:G	differentiated	3.54e-11	15	TRUE	NA	NA
rs148375239:33002864:C:T	15	33002864	15q13.3	GREM1	EUR	0	rs2377039:2803806:C:T	differentiated	4.70347e-10	53	TRUE	0.0078886	3
rs16961407:35973421:G:A	15	35973421	15q14	DPH6-DT	EAS	0.00195605	rs34961041:36552603:G:A	differentiated	4.35e-13	6	TRUE	2.75613e-05	7
rs34961041:36552603:G:A	15	36552603	15q14	MEIS2	EUR	0.845908	rs12909674:36566788:G:C	share	9.44253e-14	31	TRUE	2.58226e-07	54
rs12909674:36566788:G:C	15	36566788	15q14	C15orf41	EAS	0.845908	rs34961041:36552603:G:A	share	3.24e-08	9	FALSE	0.00234639	41
rs79076868:37282362:G:A	15	37282362	15q14	MEIS2	EAS	0.00151417	rs34961041:36552603:G:A	differentiated	7.21e-09	53	FALSE	0.00869761	63
rs78520578:48913386:G:C	15	48913386	15q21.1	FBN1	EAS	0	rs76244841:2775953:A:G	differentiated	2.74e-08	2	FALSE	NA	NA
rs58646822:62806134:C:T	15	62806134	15q22.2	TLN2	EAS	0	rs76244841:2775953:A:G	differentiated	5.11e-10	8	TRUE	0.0148354	5
rs1387385:63269446:T:C	15	63269446	15q22.2	TPM1	EAS	0	rs76244841:2775953:A:G	differentiated	3.96e-08	14	FALSE	0.00199618	60
rs2306022:68628163:C:T	15	68628163	15q23	ITGA11	EAS	1	rs2306022:68628163:C:T	share	5.85957e-09	15	FALSE	3.26588e-08	1
rs2306022:68628163:C:T	15	68628163	15q23	ITGA11	EUR	1	rs2306022:68628163:C:T	share	3.27e-08	1	FALSE	5.86004e-09	15
rs80039904:70194153:C:T	15	70194153	15q23	TLE3	EAS	0	rs76244841:2775953:A:G	differentiated	1.17e-08	12	FALSE	NA	NA
rs2278614:71748402:C:T	15	71748402	15q23	THSD4	EAS	0.953255	rs34430707:71755645:A:G	share	2.9e-11	4	TRUE	8.10027e-10	17
rs34430707:71755645:A:G	15	71755645	15q23	THSD4	EUR	0.953255	rs2278614:71748402:C:T	share	6.87065e-12	2	TRUE	7.55092e-09	37
rs112087864:71860977:C:T	15	71860977	15q23	THSD4	EUR	0.603653	rs34135577:71875797:G:GT	share	7.09804e-11	24	TRUE	5.15229e-08	8
rs34135577:71875797:G:GT	15	71875797	15q23	THSD4	EAS	0.603653	rs112087864:71860977:C:T	share	3.86e-09	4	FALSE	NA	NA
rs1542879:71925114:T:G	15	71925114	15q23	THSD4	EAS	0.0167355	rs112087864:71860977:C:T	differentiated	2.39e-26	55	TRUE	8.94128e-11	15
rs56186310:81466197:C:T	15	81466197	15q25.1	IL16	EAS	0	rs76244841:2775953:A:G	differentiated	9.14e-10	18	TRUE	0.000399669	46
rs2401176:84578364:G:T	15	84578364	15q25.2	ADAMTSL3	EUR	0	rs2377039:2803806:C:T	differentiated	9.12235e-11	11	TRUE	0.000143219	50
rs190690350:51081021:G:A	16	51081021	16q12.1	SALL1	EAS	0	rs76244841:2775953:A:G	differentiated	2.21e-08	52	FALSE	NA	NA
rs75678295:53607096:G:C	16	53607096	16q12.2	RPGRIP1L	EAS	0.104853	rs9923447:53643103:C:T	differentiated	5.02e-14	37	TRUE	0.00396917	1
rs9923447:53643103:C:T	16	53643103	16q12.2	RPGRIP1L	EUR	1	rs113961478:53656064:C:T	share	5.87339e-27	9	TRUE	1.0666e-12	34
rs113961478:53656064:C:T	16	53656064	16q12.2	RPGRIP1L	EAS	1	rs9923447:53643103:C:T	share	1.21e-13	34	TRUE	6.17447e-24	9
rs9934435:54819468:C:T	16	54819468	16q12.2	IRX3	EAS	0	rs76244841:2775953:A:G	differentiated	5.01e-09	37	FALSE	0.00192619	59
rs13329766:66624438:C:T	16	66624438	16q21	CMTM2	EAS	0	rs76244841:2775953:A:G	differentiated	5.69e-09	6	FALSE	0.0019994	13
rs2967237:72605586:T:C	16	72605586	16q22.2	ZFHX3	EAS	0	rs76244841:2775953:A:G	differentiated	2.26e-26	18	TRUE	6.63285e-05	23
rs6499581:72696112:A:G	16	72696112	16q22.2	ZFHX3	EAS	0	rs76244841:2775953:A:G	differentiated	5.68e-25	37	TRUE	NA	NA
rs79342471:86489844:G:A	16	86489844	16q24.1	FOXF1	EAS	0.825346	rs62051935:86495862:G:A	share	2.1e-19	34	TRUE	4.33111e-10	19
rs62051935:86495862:G:A	16	86495862	16q24.1	FOXC2	EUR	0.825346	rs79342471:86489844:G:A	share	1.99949e-13	19	TRUE	3.155e-18	34
rs2760734:2027644:C:T	17	2027644	17p13.3	DPH1	EUR	0	rs2377039:2803806:C:T	differentiated	2.05348e-09	51	FALSE	0.00124738	35
rs9899183:7452977:C:T	17	7452977	17p13.1	SHBG	EUR	0	rs2377039:2803806:C:T	differentiated	8.13301e-13	26	TRUE	NA	NA
rs1078523:40912760:A:G	17	40912760	17q21.31	RAMP2-AS1	EAS	0	rs76244841:2775953:A:G	differentiated	3.45e-11	55	TRUE	0.000261879	52
rs7218433:54304717:T:G	17	54304717	17q22	ANKFN1	EAS	1	rs7218433:54304717:T:G	share	1.1095e-21	7	TRUE	6.53131e-12	27
rs7218433:54304717:T:G	17	54304717	17q22	NOG	EUR	1	rs7218433:54304717:T:G	share	6.53e-12	27	TRUE	1.10943e-21	7
rs227731:54773238:T:G	17	54773238	17q22	NOG	EAS	1	rs227727:54776955:A:T	share	4.88e-15	34	TRUE	1.19674e-16	38
rs227727:54776955:A:T	17	54776955	17q22	NOG	EUR	1	rs227731:54773238:T:G	share	1.00083e-16	38	TRUE	1.0666e-14	34
rs76641259:58930159:A:C	17	58930159	17q23.2	BCAS3	EAS	0.000881955	rs9893705:59269555:C:T	differentiated	1.23e-15	6	TRUE	NA	NA
rs9893705:59269555:C:T	17	59269555	17q23.2	TBX4	EUR	0.000881955	rs76641259:58930159:A:C	differentiated	8.31753e-12	49	TRUE	0.00129122	9
rs34439270:67727076:A:ATGT	17	67727076	17q24.3	KCNJ2	EUR	0.0014535	rs72856781:68060451:A:T	differentiated	8.14748e-09	3	FALSE	0.0794328	13
rs72856781:68060451:A:T	17	68060451	17q24.3	KCNJ16	EAS	0.0014535	rs34439270:67727076:A:ATGT	differentiated	3.15e-19	3	TRUE	1.87284e-07	7
rs34476511:68900264:CACTT:C	17	68900264	17q24.3	KCNJ2	EAS	0.00469442	rs9908442:69137948:G:A	differentiated	7.89e-16	37	TRUE	5.96623e-09	44
rs9900242:69135631:G:A	17	69135631	17q24.3	SOX9	EAS	1	rs9908442:69137948:G:A	share	7.69e-31	18	TRUE	5.60519e-45	5
rs9908442:69137948:G:A	17	69137948	17q24.3	SOX9	EUR	1	rs9900242:69135631:G:A	share	3.30079e-46	5	TRUE	1.33968e-29	18
rs8068343:69447706:T:C	17	69447706	17q24.3	SOX9	EAS	0.0104849	rs9908442:69137948:G:A	differentiated	3.32e-51	18	TRUE	3.76704e-10	11
rs74880650:69929414:G:A	17	69929414	17q24.3	SOX9	EAS	0.0419952	rs9302943:70034189:A:T	differentiated	1.83e-08	55	FALSE	NA	NA
rs2193052:70026137:G:A	17	70026137	17q24.3	SOX9	EAS	0.942354	rs9302943:70034189:A:T	share	4.8e-64	37	TRUE	3.33581e-33	11
rs9302943:70034189:A:T	17	70034189	17q24.3	SOX9	EUR	0.942354	rs2193052:70026137:G:A	share	9.84338e-47	44	TRUE	3.41979e-61	37
rs12955754:8556126:G:A	18	8556126	18p11.22	RAB12	EAS	0	rs76244841:2775953:A:G	differentiated	4.18e-08	52	FALSE	NA	NA
rs2359442:41543937:G:A	18	41543937	18q12.3	SETBP1	EUR	0	rs2377039:2803806:C:T	differentiated	3.33027e-09	22	FALSE	0.00931108	37
rs4800986:52842438:A:G	18	52842438	18q21.2	TCF4	EAS	1	rs11665450:52844766:C:T	share	2.49e-10	18	TRUE	4.80065e-10	46
rs11665450:52844766:C:T	18	52844766	18q21.2	TCF4	EUR	1	rs4800986:52842438:A:G	share	1.2658e-10	46	TRUE	8.26038e-10	18
rs634687:72906960:T:G	18	72906960	18q22.3	TSHZ1	EUR	0	rs2377039:2803806:C:T	differentiated	2.54101e-11	11	TRUE	NA	NA
rs73536726:30983438:A:T	19	30983438	19q12	ZNF536	EAS	0	rs76244841:2775953:A:G	differentiated	1.11e-10	24	TRUE	0.00308177	56
rs7250869:33887405:T:C	19	33887405	19q13.11	PEPD	EAS	0.00134598	rs287104:34290995:G:A	differentiated	7.1e-11	38	TRUE	0.000131978	52
rs287104:34290995:G:A	19	34290995	19q13.11	KCTD15	EAS	1	rs287104:34290995:G:A	share	3.83828e-37	5	TRUE	5.95662e-30	37
rs287104:34290995:G:A	19	34290995	19q13.11	KCTD15	EUR	1	rs287104:34290995:G:A	share	5.96e-30	37	TRUE	3.83795e-37	5
rs6139982:6411560:G:A	20	6411560	20p12.3	BMP2	EUR	0	rs2377039:2803806:C:T	differentiated	3.86118e-09	60	FALSE	5.39511e-05	1
rs4813837:7637098:C:G	20	7637098	20p12.3	HAO1	EAS	0	rs76244841:2775953:A:G	differentiated	1.32e-08	23	FALSE	0.000188105	55
rs116792:9971408:A:G	20	9971408	20p12.2	MKKS	EUR	1	rs195800:9972308:A:G	share	4.96988e-11	11	TRUE	6.20869e-12	37
rs195800:9972308:A:G	20	9972308	20p12.2	ANKEF1	EAS	1	rs116792:9971408:A:G	share	1.95e-13	37	TRUE	7.56311e-11	11
rs3761292:21679930:C:T	20	21679930	20p11.22	PAX1	EAS	0.0494148	rs6047637:21785073:T:C	differentiated	1.2e-08	37	FALSE	8.10214e-15	45
rs73133563:21681092:G:A	20	21681092	20p11.22	PAX1	EAS	0.0442909	rs6113624:22286430:G:A	differentiated	1.62e-09	9	FALSE	0.00016615	7
rs6047635:21781625:T:G	20	21781625	20p11.22	PAX1	EUR	0.741899	rs761891:21879108:T:C	share	2.29839e-12	11	TRUE	6.1235e-07	6
rs6047637:21785073:T:C	20	21785073	20p11.22	PAX1	EUR	0.440548	rs761891:21879108:T:C	share	4.53132e-20	31	TRUE	5.61048e-07	13
rs761891:21879108:T:C	20	21879108	20p11.22	PAX1	EAS	0.741899	rs6047635:21781625:T:G	share	1.52e-14	1	TRUE	6.13339e-19	3
rs5840953:22277381:AT:A	20	22277381	20p11.22	FOXA2	EAS	1	rs6113624:22286430:G:A	share	8.97e-12	37	TRUE	NA	NA
rs6113624:22286430:G:A	20	22286430	20p11.22	FOXA2	EUR	1	rs5840953:22277381:AT:A	share	7.13134e-17	21	TRUE	3.58922e-11	37
rs1474738:31380309:G:A	20	31380309	20q11.21	DNMT3B	EUR	0	rs2377039:2803806:C:T	differentiated	2.89784e-10	1	TRUE	0.000677642	5
rs877313:38082252:C:T	20	38082252	20q12	DHX35	EUR	0.962083	rs10460626:38098820:T:C	share	1.14903e-29	2	TRUE	3.01995e-23	9
rs10460626:38098820:T:C	20	38098820	20q12	DHX35	EAS	0.962083	rs877313:38082252:C:T	share	4.5e-26	9	TRUE	NA	NA
rs6124893:45549765:G:A	20	45549765	20q13.12	EYA2	EAS	0	rs76244841:2775953:A:G	differentiated	5.5e-09	18	FALSE	0.00648485	61
rs6022641:52274008:T:C	20	52274008	20q13.2	CYP24A1	EUR	0.980022	rs6022644:52275147:A:G	share	2.99672e-10	36	TRUE	1.97242e-07	8
rs6022644:52275147:A:G	20	52275147	20q13.2	ZNF217	EAS	0.980022	rs6022641:52274008:T:C	share	7.75e-09	8	FALSE	9.77913e-08	36
rs4811827:55798240:C:T	20	55798240	20q13.31	BMP7	EUR	0	rs2377039:2803806:C:T	differentiated	2.87693e-09	23	FALSE	0.000724436	9
rs9980535:29842250:G:A	21	29842250	21q21.3	LINC00161	EAS	0	rs76244841:2775953:A:G	differentiated	3.99e-11	37	TRUE	2.63572e-06	2
rs1004164:36447889:G:A	21	36447889	21q22.12	RUNX1	EAS	0	rs76244841:2775953:A:G	differentiated	7.26e-29	12	TRUE	6.3577e-11	7
rs7281993:37072139:G:C	21	37072139	21q22.12	RUNX1	EAS	0	rs76244841:2775953:A:G	differentiated	3.78e-10	15	TRUE	0.00441875	56
rs736702:45725600:A:G	22	45725600	22q13.31	FBLN1	EUR	0	rs2377039:2803806:C:T	differentiated	1.91238e-08	30	FALSE	0.00142561	18
rs6529847:5578860:A:T	23	5578860	Xp22.32	NLGN4X	EUR	0	rs2377039:2803806:C:T	differentiated	4.23073e-08	28	FALSE	NA	NA
rs61658192:18096011:G:A	23	18096011	Xp22.13	BEND2	EAS	0	rs76244841:2775953:A:G	differentiated	3.38e-14	37	TRUE	0.00358839	44
rs11795655:35219939:G:T	23	35219939	Xp21.1	FAM47B	EAS	0	rs76244841:2775953:A:G	differentiated	1.29e-08	36	FALSE	0.0502343	44
rs4354461:68314619:G:T	23	68314619	Xq13.1	PJA1	EAS	0	rs76244841:2775953:A:G	differentiated	1.32e-27	37	TRUE	NA	NA
rs2520378:69017223:G:A	23	69017223	Xq13.1	EDA	EUR	0	rs2377039:2803806:C:T	differentiated	3.64825e-10	1	TRUE	0.0138676	10
rs1045686:92927634:G:C	23	92927634	Xq21.32	FAM133A	EUR	0	rs2377039:2803806:C:T	differentiated	4.83599e-08	60	FALSE	NA	NA
rs11167418:114665177:T:C	23	114665177	Xq23	PLS3	EUR	0	rs2377039:2803806:C:T	differentiated	3.92994e-08	2	FALSE	0.0124738	36
rs66535024:136949354:CGT:C	23	136949354	Xq26.3	ZIC3	EAS	0.981957	rs4829906:136955404:G:A	share	4.06e-15	3	TRUE	NA	NA
rs4829906:136955404:G:A	23	136955404	Xq26.3	ZIC3	EUR	0.981957	rs66535024:136949354:CGT:C	share	9.50153e-14	63	TRUE	2.42661e-14	3

## Sheet: ST5
Supplementary Table 5. The East-Asian facial similarity (EAS-FS) of 244 lead variants in whole face and 10 anatomical regions
Legend: For each lead variant, the table provides the basic information (rsid, chromosome, position (GRCh37/hg19), cytogenetic band, and the annotated genes), and the EAS-FS in each segment correspoding to anatomic facial regions. The 13 variants mainly associated with EAS-FS and their correspoding regions are colored in red.
RSID	Chr	Pos（hg19)	Cytoband	Candidate gene	Seg1	Seg5	Seg7	Seg16	Seg17	Seg18	Seg19	Seg24	Seg25	Seg26	Seg27
rs2377039	1	2803806	1p36.32	TTC34	0.0016056	0.00145666	9.45425e-05	0.000133859	0.000624844	0.000904623	0.000211261	0.0010703	0.000186727	0.000207174	7.90306e-05
rs7516137	1	3253839	1p36.32	PRDM16	0.00219556	0.00103364	-0.000442611	-0.000198601	0.000154873	0.00498798	0.000542829	0.000566473	0.000331467	0.000367184	0.000660527
rs113365915	1	11002956	1p36.22	CASZ1; C1orf127	0.000812272	0.000521504	0.00125159	-0.000970285	-0.000712529	-0.000327394	-0.000275943	0.00048776	-0.000151465	0.000201754	4.03346e-06
rs71631750	1	16083898	1p36.21	FBLIM1	0.000159654	-0.000367711	6.12555e-05	1.4073e-05	-4.29146e-05	-9.39019e-05	-0.000161052	0.000200364	3.47671e-05	2.66367e-05	-0.000129434
rs111467622	1	18996519	1p36.13	PAX7	-0.000615912	-0.00122111	0.000815292	-0.000105799	-0.000132624	-0.000462633	-0.000397204	0.0001498	-7.01695e-05	-0.00031416	-9.95974e-05
rs4912094	1	19762466	1p36.13	CAPZB	-5.78388e-05	-2.17672e-05	3.10767e-07	-2.58584e-05	-3.73994e-05	-0.000135293	-2.5562e-05	-2.18543e-05	-1.41064e-05	-4.33801e-06	-9.04583e-06
rs72906949	1	53970693	1p32.3	GLIS1	0.0017824	0.000346855	0.00223394	-0.000465752	0.00045844	0.000959636	0.000233622	0.000420212	0.000322365	6.66679e-06	0.000785044
rs3887651	1	53999509	1p32.3	GLIS1	0.00300065	0.00267701	-0.00102713	0.000775316	0.00215707	0.0038267	0.00110153	0.000951206	0.00117408	0.000232192	0.000836854
rs2948053	1	54062273	1p32.3	GLIS1	-0.000867857	-0.000153061	-0.000860735	0.00277881	0.0024523	0.000183755	0.00050245	-2.28603e-05	-0.000462348	6.18739e-05	0.00046352
rs12562360	1	60994215	1p32.1	C1orf87	-1.59094e-05	-0.000185662	-0.000472966	0.000408254	-0.000575128	-0.00068554	-0.000444909	-2.19446e-05	-0.000127233	6.72564e-05	8.9188e-05
rs3125927	1	68862622	1p31.3	RPE65	-0.00237758	0.000249127	-0.00236333	0.00397674	-0.000716145	-0.000398337	0.000347811	0.000280017	-0.000583129	-0.000887108	9.68692e-05
rs6669519	1	75584009	1p31.1	LHX8	0.0112383	0.00756415	0.00475437	0.00312761	0.00125029	0.00826097	0.00249724	0.00664621	0.00180792	0.00148989	0.000172784
rs72631743	1	118769603	1p12	SPAG17	-0.000636932	-0.000832773	-0.000223604	-6.95727e-05	0.000233121	-0.000679241	-0.000679274	0.000984148	0.000515817	0.000835564	-0.000119207
rs9661038	1	119146085	1p12	TBX15	-0.00130455	-0.00211503	0.000175026	0.00206008	0.00114003	0.000310909	3.51758e-05	0.000362751	-8.25889e-05	-0.000361053	-9.37968e-05
rs10923710	1	119502774	1p12	TBX15	0.0019249	-0.0053294	-0.00429523	0.00268894	0.00392929	0.000709379	0.0116306	0.00249639	0.000187504	0.00182666	0.0015379
rs1779445	1	119508412	1p12	TBX15	0.000288458	-0.000100595	-0.000588778	-0.000115661	5.24031e-05	-4.10443e-05	0.000468991	0.000366384	-5.86574e-05	0.00033422	-9.48706e-05
rs375911694	1	150716112	1q21.3	CTSS	-0.000383499	-0.000813605	0.000174331	0.000137233	-0.000492166	-7.38775e-05	-0.000153387	-0.000202301	3.29378e-05	-5.63026e-05	-0.000147615
rs1506948	1	165300839	1q23.3	LMX1A	-0.000119203	-0.000161186	-8.4564e-05	-0.000191479	-9.80841e-05	0.000106207	-2.59892e-05	-2.19986e-05	7.15813e-05	-9.53733e-05	-1.4023e-05
rs2476023	1	197351039	1q31.3	CRB1	-0.000174245	-0.000849447	5.29257e-05	-0.000883264	7.97412e-05	4.83993e-05	1.73692e-05	2.43984e-05	2.00056e-05	4.11454e-06	1.89528e-05
rs12042657	1	245378575	1q44	KIF26B	0.000494384	0.000493218	0.000190663	-0.00117891	-0.000272745	0.000724162	0.000164024	0.000277107	0.000532086	-5.78119e-05	-2.59229e-05
rs3856440	2	8721867	2p25.1	ID2	0.00176474	0.000353705	-1.78809e-05	-0.0016681	-0.000565191	0.00184026	-2.42884e-05	0.000517224	0.000442984	-0.000141171	-0.000148133
rs6725667	2	19524172	2p24.1	OSR1	-0.000755585	-0.00194035	-1.20558e-05	0.000933985	0.00142114	0.0011852	0.000599484	-0.000993361	0.00115828	-0.000921623	-0.00134272
rs2374385	2	42194758	2p21	PKDCC	-0.00075651	-0.000530044	0.00104634	-0.0023047	-0.0008751	0.0024844	-0.000507235	-0.0016069	0.000303371	-0.000237792	-0.000121736
rs2342419	2	45269086	2p21	SIX2	-0.000355567	0.000797635	0.000286113	-0.00066767	-0.000485012	0.000299456	-0.000579928	6.32335e-05	2.69545e-05	-1.32386e-05	-0.000728873
rs2009262	2	56012214	2p16.1	EFEMP1	0.00512045	0.00157453	-0.00967486	0.0184796	0.0204941	9.10193e-05	0.00526824	0.000438955	0.00134227	0.00305317	0.00156384
rs13403156	2	66085159	2p14	SPRED2	0.00284188	0.00118147	0.00127919	0.00116469	0.000615927	-0.00029132	-0.000256545	-0.000872122	0.000403392	0.000362276	0.000927874
rs72621585	2	67898936	2p14	ETAA1	0.000341761	2.29344e-05	0.00211991	0.000687987	0.00103785	-0.000516348	3.84744e-05	0.000676817	0.000718936	5.00368e-05	0.000197545
rs1529409	2	71830689	2p13.2	DYSF	-9.07591e-06	1.91127e-06	1.88894e-07	-2.13003e-05	-4.26118e-05	4.98713e-06	-2.24721e-06	-7.25379e-07	-5.42325e-06	-1.91176e-06	-4.72856e-06
rs6745909	2	104057121	2q12.1	TMEM182	0.000216593	0.000306485	6.46623e-05	0.000169602	1.42902e-05	-5.14691e-05	-3.15066e-05	2.23384e-05	5.21326e-05	4.89097e-05	0.000100571
rs13426125	2	104653581	2q12.1	LOC100287010	0.000190741	0.000168803	-9.60391e-06	-5.20291e-06	2.1395e-05	2.34587e-05	2.24049e-05	7.90076e-05	5.25743e-05	1.49518e-05	6.04859e-05
rs3827760	2	109513601	2q12.3	EDAR	0.00309939	-0.002037	-0.000679481	-0.0624444	-0.00803429	-0.00645028	0.00400939	0.000434632	7.75153e-05	0.000286427	0.00603726
rs2422241	2	119043036	2q14.2	INSIG2	0.000930291	0.000198785	0.000188781	0.000657039	0.000174327	6.43715e-05	0.000191831	0.000223776	7.74352e-05	0.000214886	0.000147044
rs332734	2	119452635	2q14.2	EN1	0.000607338	0.000408743	0.000508765	0.000123992	0.000144563	0.000131786	9.92261e-06	-4.69867e-05	0.000188821	0.000138823	0.000189164
rs2044473	2	129751723	2q14.3	LOC101927881	0.00207969	0.00262426	0.00184367	-0.000649027	0.000446817	5.98944e-05	-0.000218116	0.000672254	0.000232712	-8.77244e-05	-0.000330758
rs72854416	2	145675468	2q22.3	TEX41	-0.000213944	-0.000170037	-9.33816e-05	-0.000237351	0.000106919	0.000119035	0.000103209	-0.000209561	-1.45384e-05	-1.2113e-05	9.84899e-05
rs17409597	2	146045060	2q22.3	TEX41	-0.00060267	-0.000532027	-0.000298643	-0.000498988	-0.000185503	-4.15106e-05	-0.00020377	-0.000526312	-0.000235013	-0.000230583	0.000383518
rs202205854	2	146586829	2q22.3	TEX41	-0.00116933	-0.00076359	4.39385e-06	-0.000958552	-0.00193047	-0.00420679	-0.000754582	-0.000537003	-0.000651307	-0.000240198	-0.000478307
rs6718516	2	176991924	2q31.1	HOXD9	0.00393356	0.0058538	0.00126288	0.00184237	0.00077127	0.00161874	0.000517844	-0.00198211	-0.000786391	0.000282358	-0.00120872
rs1524082	2	177111419	2q31.1	MTX2	-0.000160455	-0.000209919	-0.000550776	-0.000830555	-0.000943814	-0.000231704	0.000231441	0.00155759	0.000248607	-1.39017e-06	-0.000186926
rs12619464	2	177345714	2q31.1	MTX2	0.0015545	0.00134374	-0.000498596	0.00178842	0.00131148	9.24174e-06	0.000377497	-0.000197382	-0.000183838	4.48751e-05	0.000197735
rs13408200	2	177368779	2q31.1	MTX2	0.00118035	0.00286068	-0.0038869	-0.000290589	0.00349464	0.00242013	-0.00122844	-0.00493517	-0.00174276	-0.000122166	0.000208584
rs10710424	2	200502849	2q33.1	LINC01877	-0.000169992	0.00121063	-0.000879186	-0.00330313	-0.00452143	0.00381238	0.000334701	0.00293563	0.0017384	-0.00012061	-0.00119992
rs348979	2	222926192	2q36.1	PAX3	-0.000459465	-0.000638764	-0.00113741	6.35643e-05	-0.000127713	0.00170139	-0.000812377	-0.00182552	-0.000701276	-7.38614e-05	-0.000174112
rs9288572	2	222962363	2q36.1	PAX3	0.00067597	-0.000381322	0.00295319	-0.00195773	-0.00341053	0.00137958	0.00062769	0.000652942	0.00128567	-4.95991e-06	-5.72435e-05
rs10209141	2	223056368	2q36.1	PAX3	0.000596205	0.00195447	-0.00084834	-0.000266874	-0.000235297	-0.0010012	0.000350311	-0.00139828	-0.00145087	0.000689393	0.00106362
rs111888358	2	223436184	2q36.1	FARSB	0.00131894	0.00165106	-0.000116194	0.000485119	0.000237296	0.000408557	0.000479443	0.000328345	0.000324435	-2.25042e-05	0.000151505
rs12614976	2	223542896	2q36.1	MOGAT1	0.00259117	0.00173734	0.0015836	0.000926596	0.00153472	0.000452637	0.00112293	0.000696516	0.000952553	0.000166279	0.000732066
rs12473319	2	232880971	2q37.1	DIS3L2	-0.00119265	-0.00321592	-0.000358842	-0.0108052	-0.0012031	0.00143408	-0.000178191	0.00513443	0.00353113	7.33311e-05	-0.00044636
rs2121905	2	239491831	2q37.3	TWIST2	-0.000433873	-5.54225e-05	-0.000180028	0.00028705	6.17628e-07	-0.000196756	-0.000106527	8.10063e-06	-6.23242e-05	-4.80141e-05	-0.000194127
rs116910218	2	239690223	2q37.3	TWIST2	0.000224393	0.00027626	0.00103965	0.000658021	0.000240608	0.000100419	7.59918e-05	0.000318593	0.000223604	5.91946e-05	0.0001191
rs1828554	3	9308332	3p25.3	SRGAP3	0.000287258	0.00065467	0.000527303	0.000453299	-0.000113362	0.00084976	0.000213878	-0.000213826	-0.000715822	-0.00018726	-7.73882e-05
rs60889564	3	66896826	3p14.1	KBTBD8	0.000837703	0.000359721	-0.000488592	-0.000333668	4.12446e-05	0.000780848	0.000164042	-0.000399235	1.3639e-05	-0.00011213	-7.22325e-05
rs10713146	3	71239625	3p13	FOXP1	-0.000719106	-0.00052634	-8.75163e-05	0.000474111	-0.000146714	0.000460718	-5.34161e-05	-0.000470606	5.33424e-05	-0.000142907	5.57572e-05
rs36024188	3	86960554	3p12.1	VGLL3	0.000858452	-0.000510483	0.000422824	-0.000391761	-0.000136714	3.79364e-05	0.000528758	0.000833353	0.000360386	0.000948227	0.000267936
rs73844434	3	87029924	3p12.1	VGLL3	-0.000287581	8.59142e-06	-0.000183238	-0.000113714	-0.000188016	-0.000466727	-0.000824737	8.24499e-05	-0.000152189	-6.31206e-07	-0.000152789
rs7431338	3	88880647	3p11.1	EPHA3	0.000319242	0.000145413	0.000490377	-0.000425144	-0.000386431	-0.000529182	-0.000116154	-4.06654e-05	-2.2606e-05	8.18928e-06	-6.29564e-05
rs6765833	3	89035939	3p11.1	EPHA3	-0.000147924	-8.26051e-05	-0.000719575	-9.10436e-06	3.19851e-05	6.76596e-05	3.48833e-06	0.000219918	0.000340033	3.90447e-05	-7.66411e-05
rs4857879	3	128064118	3q21.3	EEFSEC	-0.000903126	0.000484366	-0.00125049	0.00215064	0.00346845	0.00010894	0.000432946	-0.000512163	-0.000728778	0.000493702	1.87749e-05
rs55686439	3	128201376	3q21.3	GATA2	-0.00064884	-0.000856583	-7.93226e-05	-0.000348693	-0.000300485	-0.000136327	0.000116562	-0.00013888	0.00014885	6.32905e-05	-5.44009e-05
rs9812461	3	133820689	3q22.2	RYK	-0.000241345	-0.000191068	-0.000235875	-0.000290581	1.02354e-06	0.000678779	-0.000145283	-1.49208e-05	-1.30947e-05	-9.31626e-05	-8.68372e-05
rs111414955	3	138668060	3q22.3	FOXL2	-0.000337611	-0.000284781	-0.00010267	-0.00022027	4.59585e-05	3.44181e-05	-4.29945e-05	1.35522e-05	0.000159598	-4.50748e-05	-9.20396e-05
rs72630201	3	138839901	3q23	BPESC1	-0.000695063	6.15015e-05	-0.000236194	-0.000397297	4.4693e-05	-0.000835596	-0.00104427	-0.00152374	-0.000412185	-0.000252336	0.000242209
rs12632544	3	138946868	3q23	MRPS22	-0.00164611	-0.00171358	-5.76461e-06	5.91302e-05	-0.00107077	0.00377231	-6.49408e-05	0.00736904	0.00843581	0.0011134	-0.00826922
rs9836369	3	157500853	3q25.32	SHOX2	0.00234996	0.00182567	-0.000798608	-0.000175069	0.00148698	0.000857372	0.000825451	0.000834288	0.000197709	0.000162804	0.000440963
rs552757	3	177309024	3q26.32	LINC00578	0.00028533	6.21368e-07	0.000148974	-2.11443e-05	5.31724e-05	2.13627e-05	5.12466e-05	0.000208148	-1.44383e-05	4.73209e-05	3.24128e-05
rs12633616	3	184339099	3q27.1	EPHB3	0.000502748	0.000488178	0.000192455	-0.000202426	-8.04586e-05	0.000476499	-0.000255627	-0.000515332	-0.000111436	-3.60625e-06	3.5769e-05
rs9844571	3	184445284	3q27.1	MAGEF1	-0.000258793	1.83604e-05	-0.000399659	-3.96635e-05	-0.0003799	0.000203367	-0.000666735	6.61504e-05	-3.74241e-05	3.05282e-05	0.000113046
rs74921869	4	1005179	4p16.3	FGFRL1	0.000881098	0.000978253	0.000317779	-0.000486965	0.00103464	0.000431641	-7.32642e-05	0.000388025	4.65959e-05	-1.52046e-06	0.000197106
rs371525829	4	4774124	4p16.2	MSX1	-0.000377008	-0.000210405	-2.752e-05	0.000330202	4.85903e-05	-0.000181097	0.000250907	-6.11716e-05	-0.000204021	1.90191e-05	-1.04973e-05
rs34998838	4	4794202	4p16.2	MSX1	0.000337606	0.000430543	-6.88346e-05	-0.000558057	-0.000365476	0.000438034	-0.000122218	-1.66863e-05	0.000155397	-4.89082e-05	0.000134443
rs3815181	4	7204493	4p16.1	SORCS2	0.000349001	0.000381497	-4.63672e-05	-0.000224164	-0.00021498	-0.000113212	5.71595e-05	0.00119462	0.000434903	0.000127295	0.000443171
rs7434700	4	8711408	4p16.1	CPZ	0.000806078	-0.000563983	-0.000335922	-0.000887476	0.000717678	-0.000175949	0.000877972	-0.00050328	-3.9616e-05	0.000103805	0.000191372
rs1874285	4	18607550	4p15.31	LCORL	0.00103378	0.00204053	-9.26362e-05	-0.0012679	-0.000465756	-0.000971825	-0.000538899	-0.00152442	0.000669425	-0.000342465	0.000592367
rs117922332	4	22394239	4p15.2	ADGRA3	0.000364769	0.000137194	0.000307215	8.2007e-05	-7.59179e-05	-0.000320538	0.000104013	0.000367112	0.000242521	7.68247e-05	-5.03585e-05
rs60442375	4	42393308	4p13	SHISA3	0.000338335	-0.00071272	-0.00443702	-0.00393148	3.52598e-06	-0.000207718	0.00119527	0.000645439	0.000388969	-0.000530489	0.000152327
rs2203049	4	61371870	4q13.1	LPHN3	0.00184519	0.00124882	-0.00102888	0.00340307	0.00406129	0.000586027	0.00127921	0.000108721	0.000704447	5.30972e-05	0.000397098
rs6843082	4	111718067	4q25	PITX2	-0.00232583	-0.00759279	0.00171847	0.00036962	-0.00289209	0.000249695	-0.000172497	-7.39411e-05	-2.72201e-05	0.000304977	0.000593618
rs326899	4	112672623	4q25	PITX2	0.00108538	0.00136272	-0.000516449	0.000448324	0.000365528	-0.000586858	0.000428831	0.000323351	-6.46119e-05	8.69261e-05	-0.000245232
rs7694450	4	121998104	4q27	NDNF	-0.000575596	-0.000255789	-3.13699e-05	0.000200948	0.000105248	0.000172329	0.000397889	-0.00020967	4.44078e-05	-0.000532133	-0.000273957
rs200087457	4	126951202	4q28.1	MIR2054	9.69055e-05	-0.000167958	-0.000324063	-3.72131e-06	-0.000230485	-0.000218908	0.000481723	0.000222191	3.07191e-05	9.64804e-06	-0.00014517
rs17011824	4	127810815	4q28.1	INTU	0.000314291	-7.54125e-06	-0.000538536	-0.00139294	0.00112775	0.00247836	0.000534335	0.000340071	8.5898e-06	0.000581939	6.08121e-05
rs4834173	4	127983463	4q28.1	INTU	0.00014363	0.000570802	-0.000296967	-0.00146059	-0.000509456	0.00097965	-0.000129408	0.000224123	-6.41998e-05	-8.71976e-05	0.000211345
rs9995821	4	154828366	4q31.3	SFRP2	5.81694e-06	-1.48301e-05	-4.62956e-07	-1.53532e-05	1.60825e-05	-1.08351e-05	-1.36741e-05	4.41254e-06	5.65899e-08	1.14342e-06	-1.38478e-06
rs6834372	4	155204724	4q31.3	DCHS2	0.000269987	0.000165238	3.52801e-06	-0.000319439	-9.92012e-05	0.000148518	3.45216e-05	0.000447009	0.000125589	-1.21758e-05	-2.48614e-05
rs6814518	4	174469388	4q34.1	HAND2	3.35136e-05	-9.59145e-05	6.18523e-05	0.000741116	9.00089e-05	-3.56848e-05	4.29656e-06	-2.57771e-05	-5.82163e-05	4.97779e-05	1.61151e-06
rs17537048	5	1901205	5p15.33	IRX4	-6.12682e-05	-4.72556e-05	-2.23547e-05	-0.000104442	-1.73769e-05	-4.31399e-06	-9.31473e-06	-2.49257e-05	-4.67139e-06	7.15323e-07	-2.22948e-06
rs40646	5	4977136	5p15.32	LINC01020	2.39378e-05	7.22407e-05	-0.0013336	-0.00219504	-0.000335138	0.00037352	-8.35881e-05	-0.000153211	-0.00092919	-0.000389573	-0.000328368
rs7712213	5	44451269	5p12	FGF10	0.00134502	0.000746094	-0.000651614	-0.000101283	-0.00028995	3.90331e-05	-0.000183952	0.00090716	0.000105945	-0.00022985	-0.000587635
rs2891934	5	82125335	5q14.2	MIR3977	-0.00144812	-0.00253833	0.00101338	-0.00223507	-0.00222368	-0.000945058	-0.00262042	-0.00169841	0.000355982	-0.000172185	0.000400379
rs880264	5	94069803	5q15	MCTP1	-0.000883992	-0.000389111	-0.000479701	-2.54726e-05	-8.99554e-05	-0.000763959	-0.00106915	-0.00107424	0.000339412	-0.000315623	-0.000209024
rs13182341	5	128107907	5q23.3	FBN2	-0.000482044	-0.000397562	-0.000307157	0.000189367	3.157e-05	8.93222e-05	-0.000268863	-6.05659e-05	2.14589e-05	-9.57659e-05	-6.27386e-05
rs6555969	5	171128464	5q35.1	FGF18	-0.000283551	-0.000178723	-9.02535e-05	1.33437e-05	-2.89205e-05	1.67129e-05	-4.75304e-05	-0.000148853	-0.00010024	-3.64673e-05	4.96515e-05
rs6556132	5	173848018	5q35.2	MSX2	0.000908444	0.0010972	-0.000606323	-0.000587697	-9.9213e-05	0.000349837	0.000168998	0.000109348	9.66112e-05	0.000313153	0.000261235
rs77646409	6	2145838	6p25.3	GMDS	0.00126848	0.000886845	0.000142256	0.000445541	0.00117153	-0.000466906	0.000277149	-0.000263682	0.000140478	4.93584e-05	0.000163186
rs13196306	6	2252322	6p25.3	GMDS	-0.000337152	-0.000180335	-9.14513e-05	-6.61758e-05	-0.000156527	-6.66248e-05	-0.000106985	-0.000346337	-5.87543e-05	-7.59393e-05	-1.3568e-05
rs60608799	6	2455730	6p25.2	GMDS	-3.25808e-05	-3.72459e-05	-8.11315e-05	-9.68122e-06	1.01313e-05	-9.90319e-06	-1.66981e-05	7.03548e-06	1.10218e-05	-5.32398e-06	2.36538e-06
rs4714260	6	39536622	6p21.2	KIF6	8.21023e-05	4.36918e-05	3.73763e-05	0.000123974	6.52488e-05	4.35613e-05	-1.09807e-05	1.47689e-05	9.4205e-07	6.56209e-06	-1.64966e-06
rs13206526	6	44816181	6p21.1	SUPT3H;RUNX2	0.000704247	0.000754326	0.000617687	0.000212111	0.000149492	1.48897e-05	-1.98385e-05	-0.000593831	0.000169862	-8.53665e-05	7.50866e-05
rs2857487	6	50793671	6p12.3	TFAP2B	-1.91163e-05	-3.06629e-05	2.30271e-05	-6.82357e-05	-1.57028e-05	9.79781e-05	-1.57474e-05	-6.57831e-05	3.86559e-05	-1.94721e-05	5.69147e-07
rs9381919	6	50931059	6p12.3	TFAP2B	5.55943e-05	0.000327406	-1.05531e-05	0.000460104	-1.82157e-05	-0.000649094	-4.76469e-05	0.000106847	-0.000254113	-8.63503e-05	-0.00026682
rs1886569	6	51038157	6p12.3	TFAP2B	-0.0023483	-0.00464238	0.000141186	-0.00114464	-0.000465554	-0.000910363	-0.00266382	-0.00131757	0.000432364	-0.000339608	0.000312306
rs788509	6	51704886	6p12.3	PKHD1	-0.00130155	-0.00178559	-0.00152398	-0.000837507	-0.000284564	0.000144947	-0.000642887	1.61614e-05	-0.000148473	-0.000158758	-0.000505741
rs28880333	6	85313340	6q14.3	TBX18	-0.00298908	-0.00245159	0.000549964	-0.000474167	-0.000451235	-0.00137317	-0.000282212	-1.54292e-06	-0.000484473	-0.000143384	-0.000704365
rs147468294	6	85811665	6q14.3	TBX18	0.0035138	0.0019214	0.00313092	0.000696672	0.000395651	0.00102274	0.000387469	0.00148436	0.000212162	-6.61755e-05	0.000367362
rs36126080	6	91998112	6q15	MIR4643	-0.00134008	-6.51528e-05	-0.00182113	0.000258474	0.00032775	-0.000123963	-0.000331835	-0.00319391	-0.000675419	-0.000604376	-0.000169988
rs6568401	6	106188818	6q21	PRDM1	0.000110958	5.07618e-05	0.000491313	-0.000581287	0.00015295	-9.30026e-05	-5.19158e-06	0.000197776	0.000206712	-0.000203665	-6.22018e-05
rs73547403	6	113186636	6q21	RFPL4B	0.000146596	-0.00270657	0.000174774	-0.000763795	-0.000783415	2.05995e-05	0.000709518	-0.000287427	0.000519108	0.000152559	0.000298952
rs6940295	6	127190932	6q22.33	RSPO3	0.000203018	0.000162059	-3.94634e-06	0.000240836	4.55759e-05	7.39913e-05	1.25168e-05	2.94467e-05	1.66173e-05	6.21228e-06	3.44161e-05
rs17062339	6	133639892	6q23.2	EYA4	-0.00299004	-0.00224242	-0.0015315	0.00204364	-0.000147467	0.00127199	0.000153334	-0.0028986	-0.000183313	-0.000986854	0.000388476
rs1418341	6	136260450	6q23.3	PDE7B	-0.00120962	-0.000790206	-0.000748264	5.48085e-05	0.000106878	0.000386533	-4.10404e-05	0.000398619	0.000496965	-0.000144504	-0.000148596
rs4895534	6	138871197	6q23.3	NHSL1	0.000955668	0.00202256	0.000718427	-7.50324e-05	-0.000739368	-0.000863391	0.000248651	0.000486747	8.00169e-06	0.0001308	4.25421e-05
rs17139675	7	18733748	7p21.1	HDAC9	0.00099876	0.00137049	0.000271331	0.0010114	-0.00047554	-0.00205039	-0.000858816	0.000337118	-0.000207779	-0.000607313	-0.00010415
rs1178171	7	18794346	7p21.1	HDAC9	0.00370697	0.00127831	0.0023173	0.0042329	-0.000753073	-0.00470606	-0.000448884	0.00078054	0.000514195	0.000946118	2.3818e-05
rs1420150	7	33321872	7p14.3	BBS9	-0.000161042	0.000382827	-0.000286534	9.02782e-05	-0.000773201	-6.94658e-05	-0.000269071	-0.000811808	-0.000146544	-0.000260953	-0.000108168
rs1362462	7	34162983	7p14.3	BMPER	-0.000251723	0.000227951	-0.000149635	0.000283638	-0.000750853	-0.000108398	-0.000152203	-0.000397887	-3.00223e-05	-2.41778e-05	-8.96944e-05
rs72586392	7	42055499	7p14.1	GLI3	-0.000160789	0.00105732	-9.48705e-05	0.000934557	0.00129008	-0.000300032	-0.000457685	-0.000157386	-9.27309e-05	5.1468e-05	0.000247094
rs28584384	7	81245568	7q21.11	HGF	0.000532012	0.000517855	0.000362279	0.000494621	0.000212414	-0.000456361	4.78806e-05	0.000243788	0.000158739	2.47552e-05	0.000207096
rs11972687	7	81281845	7q21.11	HGF	-0.00267244	-0.00325234	-0.00151379	-0.000347301	0.0010813	0.00341431	-0.000639088	-0.000573647	0.000147785	-0.000504437	-0.00117141
rs62470051	7	96150233	7q21.3	DLX5	0.000436781	-0.000365377	-0.000155626	0.0010235	0.000501153	-5.50269e-05	0.000206708	-7.71862e-06	-1.27084e-05	-9.43925e-06	0.000361275
rs12707194	7	134644454	7q33	CALD1	-0.000538151	-0.000161656	-0.000262856	-0.000182095	-1.43967e-05	-0.000137945	-0.000163295	-0.0013727	-0.000391243	-5.41265e-06	-0.000205795
rs111847181	8	9087248	8p23.1	PPP1R3B	0.00300377	0.00141998	-0.000663244	-0.000550427	0.0035004	0.00599423	0.00198017	0.000455851	-0.00103326	9.11639e-05	0.00173568
rs77139634	8	27729914	8p21.1	SCARA5	-0.000766464	-0.000835093	-8.93117e-05	-0.000108042	-0.000221384	0.000968672	-9.00715e-05	-0.000583057	-0.00022074	-3.26691e-05	5.73926e-05
rs7833284	8	60621509	8q12.1	CA8	-0.00215845	0.000142787	-0.00127357	-0.00147387	-0.0014678	-0.000609798	-0.000888576	-0.00210289	-0.00171666	-0.000562313	0.00032974
rs745578	8	72466324	8q13.3	EYA1	0.00395502	0.00227256	0.00312851	0.00530044	0.00128422	-0.000409496	-0.00125788	0.0045745	0.00420942	-0.00022951	-0.00156087
rs6985531	8	77695388	8q21.11	ZFHX4	-0.000686531	0.00049362	-0.00106521	0.00159292	-0.000186422	0.00105896	-0.000378873	-0.000115304	0.000201432	-4.55198e-05	5.29555e-05
rs10808653	8	93673799	8q22.1	C8orf83	0.0018297	0.00210292	-0.000390657	-0.000589133	-0.0018448	-0.00363277	-0.0024294	0.00128291	0.00046214	0.000713315	-0.00274329
rs7841749	8	99247467	8q22.2	NIPAL2	0.000606601	0.000269713	-0.00146143	0.000545296	0.000994139	0.000285451	0.000742509	0.000902689	0.000502512	0.000448225	-0.000452978
rs12547849	8	100026275	8q22.2	VPS13B	-0.0063004	-0.00545761	9.50104e-05	0.00162425	-0.00075376	-0.000326333	-0.00100647	0.0019389	-0.000311983	-0.000974871	-0.00203724
rs629334	8	108972019	8q23.1	RSPO2	9.07604e-06	-0.000142372	4.03833e-05	0.000356244	0.000244835	6.80995e-05	0.000258531	-3.86722e-05	3.40788e-05	2.15386e-05	0.00012593
rs6983169	8	109407393	8q23.1	EMC2	0.00135944	0.000284989	-9.1899e-05	3.82176e-05	0.00132111	0.00191705	0.000302941	-0.000373914	-4.43407e-05	0.000221824	0.00103228
rs58116396	8	121986318	8q24.12	SNTB1	0.00121413	-0.000561751	-2.63421e-05	-0.000495821	4.90017e-05	-0.00103692	-0.000155596	0.00146055	0.000838461	0.000205322	-0.000484454
rs7821044	8	123015916	8q24.13	HAS2	-0.00251641	-0.00193312	0.000929438	2.36693e-05	-0.000357508	-0.000643079	-0.00111877	-0.00187894	-0.00102487	-0.000204589	-0.000877245
rs16897057	8	123462066	8q24.13	ZHX2	0.000443114	1.60239e-05	0.00018992	1.82578e-05	-8.55659e-05	0.000339982	4.0465e-05	0.000568817	0.000400434	-8.35165e-05	0.000287474
rs12544443	8	129837463	8q24.21	LINC00976	0.00123391	0.000754664	3.44254e-05	0.0128858	0.000720249	0.00101116	-0.000229187	0.0019466	0.00187855	-6.48623e-05	-0.000568597
rs4495442	8	144333836	8q24.3	ZFP41	-0.000182629	-0.000312695	-0.000316784	-0.000223747	-3.55652e-05	0.000190494	0.00013495	1.85959e-05	2.43883e-05	-2.21869e-05	6.68719e-06
rs10814915	9	4290544	9p24.2	GLIS3	0.000258235	0.000200585	0.000280189	9.48551e-06	-3.97622e-05	4.50578e-05	4.70471e-05	0.000254891	2.60817e-05	-1.34388e-05	-6.04537e-05
rs7867828	9	14038763	9p23	NFIB	0.000337829	-0.000324699	-0.000592104	-0.00131329	0.000165288	-0.000279064	-5.03814e-05	-0.000476399	1.65618e-05	-0.000162826	0.000367799
rs13287985	9	16960741	9p22.2	BNC2	-0.00143732	-0.00316084	-4.83664e-05	-0.00065232	0.000765075	7.68918e-05	-1.44218e-05	-0.00029096	-2.14821e-05	-0.000363746	-0.000287193
rs7851959	9	20308166	9p21.3	MLLT3	0.00226171	0.00221912	0.00106181	4.96577e-05	-0.000223362	0.00124103	-2.92479e-05	0.00201249	0.000187689	-0.000108578	-0.000611507
rs78492399	9	94474621	9q22.31	ROR2	-0.00055921	-0.000676718	-0.000407974	-0.00067938	-0.000240545	0.000707037	1.04471e-05	-0.000812682	-0.000113999	-0.000177911	0.000177169
rs2282216	9	97869692	9q22.32	FANCC	-0.000393662	-0.000890341	-6.80977e-05	0.000157911	-0.000433792	0.000336938	-1.00916e-05	0.000150656	-0.000497869	6.49193e-05	0.000247188
rs75614054	9	98275789	9q22.32	PTCH1	-2.59817e-05	-9.91532e-05	-2.39028e-06	3.91315e-05	5.1588e-05	-7.65679e-06	2.15454e-05	4.68765e-05	2.85842e-06	-1.43682e-05	-5.8553e-06
rs10817529	9	116642091	9q32	ZNF618	-0.000889359	-0.000656979	0.000696845	-0.000235308	-0.0019835	-0.000321045	-6.31848e-05	-0.000599684	-0.000207494	-0.000261014	-0.00012899
rs200607307	9	125665127	9q33.2	RC3H2	0.0029708	0.000800641	-0.000877245	-0.000290542	0.00349198	0.00155138	2.8062e-05	-1.78216e-05	-0.00141893	-0.00142303	9.61152e-05
rs7871091	9	129559935	9q33.3	LMX1B	-0.00110006	-0.00697824	0.0019206	-0.000858337	0.00315045	0.00198967	0.00223147	0.00104067	0.000707112	0.00027285	0.000790621
rs2122934	10	15519799	10p13	ITGA8	0.000596937	0.000346027	0.000212955	0.00150699	0.000464445	0.000189753	0.000114132	4.61916e-06	-6.62575e-05	0.000146252	8.20185e-05
rs1107307	10	27897769	10p12.1	MKX	0.000153921	2.20059e-05	0.000316254	0.00192659	0.000284119	-0.000586955	-0.000183879	-0.000685152	-0.000271396	4.67536e-05	0.000189148
rs4749259	10	27961690	10p12.1	MKX	0.000270279	-0.00190038	-0.0031927	-0.00533944	-0.000454201	-0.000225743	0.000614732	-0.00277282	0.000518657	0.00125712	0.000691005
rs12258832	10	28010605	10p12.1	MKX	0.002457	0.0020441	-0.00199343	0.000367109	0.000717421	0.000733535	0.00045682	-0.000962886	-0.000399058	0.00142732	0.00157737
rs7899626	10	63825561	10q21.2	ARID5B	0.000722177	0.00130202	0.000341175	0.000610897	0.000324124	8.2563e-05	1.83358e-06	-8.32399e-06	-5.43258e-05	-5.86606e-05	4.48767e-05
rs1907337	10	78158137	10q22.3	C10orf11	0.000423725	0.00349853	-0.00131033	0.0045688	-4.90724e-05	-0.000408913	-0.00309766	-0.00135916	-0.000262453	-5.2911e-05	-0.000587828
rs1093316	10	96108774	10q23.33	NOC3L	0.00111538	0.000530371	0.000253187	0.000155668	0.000448457	0.000170071	-0.00132828	0.000655516	-5.32739e-06	-0.000159128	-0.000129542
rs544784	10	100452838	10q24.2	HPSE2	-9.66072e-06	7.05735e-05	-0.000168014	4.33426e-05	3.16461e-05	5.5559e-05	1.73361e-05	-0.000149887	-7.50187e-05	-1.68209e-05	1.49099e-05
rs12570134	10	119284408	10q26.11	EMX2OS	0.00285945	0.00295564	0.000741132	-0.000601516	-0.000112582	0.000615089	0.00158774	0.00129294	0.00154716	0.00028235	7.74608e-05
rs3740550	10	119767504	10q26.11	RAB11FIP2	0.00213804	0.000740161	0.000333771	0.000360617	0.000940495	-0.000284324	0.0037722	0.000913048	0.00119914	-3.88599e-05	0.000956165
rs1674906	10	127837659	10q26.2	ADAM12	-0.00176846	-0.000322461	-0.000603634	-0.00128964	-0.00151895	-0.000514093	-0.000226545	-0.00136509	-3.74676e-05	0.00015232	0.000103005
rs5789450	11	6257310	11p15.4	FAM160A2	0.000366302	0.000359646	0.000233847	0.000150223	-1.43622e-05	-0.000103077	-1.65225e-05	-8.08502e-06	5.14978e-06	5.89913e-05	-0.000170548
rs7938500	11	16025573	11p15.2	SOX6	0.000556529	0.00153786	-0.000996119	7.85223e-05	-0.000127228	0.00379913	0.000707951	-0.000541844	-9.02115e-05	-0.000322803	0.000968237
rs7937453	11	44471561	11p11.2	ALX4	0.00425993	0.00289369	-0.000191923	-0.000150782	0.0015372	0.000674777	0.000720561	0.00306483	0.00124505	0.000118111	-0.000692048
rs34997377	11	86634170	11q14.2	FZD4	-0.000548312	-0.000985256	9.3113e-05	0.00122738	0.000978741	0.000233776	9.7774e-05	-0.000443383	-0.000338976	6.46117e-05	-1.82784e-05
rs76482532	11	128236637	11q24.3	ETS1	-3.68016e-05	0.000126628	0.000975113	0.000404736	4.34342e-05	-9.87422e-05	0.000144941	0.000350167	0.0003996	-0.000104844	0.000282503
rs10771396	12	28100554	12p11.22	PTHLH	0.000561528	0.000959619	0.000158637	0.000746643	0.00020966	0.000200982	0.000602437	-0.000506438	-0.000265491	0.00017794	0.000285251
rs10771405	12	28239898	12p11.22	PTHLH	0.00228333	0.00134234	0.00109682	-0.000328257	0.000620426	0.00022284	0.000494425	0.00307159	0.000889764	0.000233358	0.00158008
rs11049559	12	28525197	12p11.22	CCDC91	0.000126191	-9.22252e-05	1.41517e-05	-0.000106425	-1.06244e-05	-0.000159196	9.21238e-05	-0.000100536	7.46093e-05	6.6787e-05	-5.23427e-05
rs34599763	12	65843897	12q14.3	MSRB3	-0.00127571	-0.00119361	-0.000453497	-0.00319984	0.000927518	-0.00130818	0.000946829	-0.000844911	-0.000694738	-4.55085e-05	0.00106904
rs11175885	12	66114630	12q14.3	RPSAP52	0.00270725	0.000454602	0.0010498	-0.00866727	-0.00132834	0.00231382	0.0012685	0.000170739	-0.000478891	0.000200771	-0.000311264
rs35084099	12	66340703	12q14.3	HMGA2	0.00135136	0.000603002	0.00171	-0.000799598	0.000297556	8.75163e-05	0.000350045	-6.48754e-05	9.32446e-05	0.000201739	0.000503461
rs7975189	12	66446108	12q14.3	HMGA2	-0.000296025	-6.98859e-05	-0.000180736	0.00110518	0.000183308	0.000615952	-0.000303391	-0.000225142	-0.000245908	4.0286e-05	0.000236433
rs11116137	12	84356493	12q21.31	TMTC2	-0.00029791	-0.000155058	-0.000289714	-0.000529481	-6.44365e-05	8.66719e-05	-3.02158e-05	-0.000222334	-0.000158721	-4.76162e-05	3.44127e-05
rs4128162	12	84429631	12q21.31	SLC6A15	-0.00101307	-0.00129828	0.000335131	-0.00210234	-0.00142665	0.000862833	-0.000594905	-5.8382e-07	-0.000223292	-0.000184347	0.000316409
rs10862968	12	85714770	12q21.31	ALX1	0.000836908	0.000901939	-0.00053101	-0.000660775	-0.00175733	0.000693532	-0.000521236	0.000548997	0.000382151	-3.16333e-05	0.00018964
rs10862979	12	85787008	12q21.31	ALX1	-0.00016541	0.00107712	-0.000494242	-0.000620342	-0.00015874	0.0013713	-0.000354385	-0.00112935	-0.000537252	-9.84717e-05	2.32666e-05
rs34034288	12	112768080	12q24.13	HECTD4	-0.00116767	-0.00683991	-0.00135236	-0.000435165	0.00254925	0.000164545	-0.00175488	-0.000914515	0.00159403	-0.000600191	-0.00132577
rs1317715	12	115418799	12q24.21	TBX3	0.00117023	0.00104904	0.000952997	0.00105901	-0.000731952	0.000909191	-0.000213151	-0.000428052	-0.000264615	-4.6475e-05	-0.000230724
rs11057528	12	124715164	12q24.31	ZNF664-FAM101A	-0.000787595	-0.000754652	-0.000397625	2.08726e-05	-0.000123232	-0.000137839	-0.00026039	-0.000228451	-0.000219611	-0.000181463	-0.000106596
rs34875425	12	130720444	12q24.33	FZD10	-7.35099e-05	0.000488042	-0.000161819	0.000132688	-0.000307855	0.000392597	-0.000203518	0.000122256	8.16661e-05	-0.000152554	0.000122701
rs2253604	13	95364337	13q32.1	SOX21	0.000461575	0.00144471	0.00047089	-0.00121758	-0.000322366	0.000426794	-0.000135484	0.000184684	0.000227353	-5.64724e-05	-5.00659e-05
rs7331308	13	95742383	13q32.1	ABCC4	0.000246739	0.000152912	0.000185518	0.000169119	0.000205363	0.000261443	-8.99238e-06	5.85826e-05	5.39523e-05	7.7719e-05	-2.44307e-05
rs9557284	13	100393276	13q32.3	CLYBL	-0.00106815	-0.00297584	0.00122969	-0.00134203	-0.000676192	-0.000659678	-2.92986e-05	0.00142445	-0.000829755	-0.000218861	2.79189e-06
rs75493661	13	106814040	13q33.2	LINC00460	0.000104362	0.000309756	-0.000117991	0.00102529	0.000206048	0.00169956	0.000117838	0.000147381	-0.000238274	0.000114072	0.000316921
rs12429168	13	110376963	13q34	IRS2	-0.000106134	0.000237432	6.74919e-05	1.83346e-05	-0.000189215	-0.00226092	-0.000117884	-3.68564e-06	-7.40687e-05	-4.44029e-06	-5.35071e-05
rs75208169	14	23448918	14q11.2	AJUBA	-0.000273896	-0.00075443	-0.000132088	-0.000765248	-0.000502413	4.08303e-05	1.62031e-05	0.000155641	3.98888e-05	-8.811e-05	2.00321e-06
rs10136118	14	35121086	14q13.1	SNX6	0.00121972	0.000230905	-0.000890322	0.00119221	0.00118482	0.000319853	-0.000130995	0.000166457	0.000294368	-0.000117808	-9.22496e-05
rs4901427	14	53964998	14q22.1	DDHD1	-4.98523e-05	-7.43426e-05	-5.62526e-05	5.21558e-05	7.92703e-05	3.55126e-05	1.04669e-07	3.6312e-05	1.14768e-05	-6.10781e-06	-2.08876e-05
rs34763890	14	54406741	14q22.2	BMP4	-0.00122182	0.000530582	-0.00027298	0.00147132	0.000944429	0.000130311	0.0010743	-0.00307868	-0.00146234	-0.000328706	0.000120247
rs811156	14	54610759	14q22.2	BMP4	-0.000946617	-0.0011983	-0.000116945	-3.2386e-05	-0.000873186	-0.00269562	0.000178463	-0.00179637	0.000111223	-0.000455188	-0.000498162
rs1951109	14	61164846	14q23.1	SIX4	-0.000641829	-0.00121381	-0.000574425	-0.000546095	-0.000315084	0.000666556	-0.000356265	-0.000246133	4.12417e-05	-0.000145397	0.000900096
rs12879559	14	61664530	14q23.1	SIX4	3.76732e-05	-0.000492783	0.000159008	-0.000266194	-0.000110199	-0.000244375	3.10899e-06	0.000310159	0.000165427	2.59269e-05	-0.000186524
rs56246022	14	85139058	14q31.3	SNORD3P3	0.000499868	0.00019226	-0.000122427	-0.000426112	8.48547e-05	5.89726e-05	0.000157211	0.000425497	0.000234599	0.000114032	0.000453602
rs58569036	14	98122190	14q32.2	LINC02291	0.000119404	-0.000361159	-0.000530025	-0.00066433	6.29315e-05	0.000430335	1.82894e-05	0.000382679	0.000461915	5.18344e-05	3.25903e-06
rs368145116	14	98189192	14q32.2	C14orf64	-0.000300821	-0.000306601	-0.000327024	-0.00060476	-0.000130098	-0.000762904	-1.05846e-05	-0.000681881	-0.000562733	8.23885e-05	-0.000185394
rs17096983	14	98935548	14q32.2	BCL11B	-1.347e-05	1.00969e-05	0.000550803	0.00150356	6.01493e-05	9.69162e-05	3.13222e-05	0.000653161	8.3875e-05	-3.27e-05	-0.000294484
rs147599640	15	26490867	15q12	GABRB3	0.000173727	0.000212689	0.000531344	0.000529471	0.000105842	-5.52944e-05	-0.000102856	0.000142528	8.33245e-06	-2.47894e-05	3.13222e-05
rs16961407	15	35973421	15q14	DPH6-DT	0.000980166	0.00117098	0.00128742	-0.000276994	-0.000134537	-0.000221717	8.48312e-05	-0.000613794	-4.21636e-05	0.000485461	0.00178902
rs12909674	15	36566788	15q14	C15orf41	0.000740011	0.00235215	-9.69557e-05	0.00378605	0.00029769	-0.000547235	-0.000526244	-0.000244413	0.000220239	0.000411131	0.00098911
rs79076868	15	37282362	15q14	MEIS2	-0.00180787	-0.000603399	0.00064659	-0.000639413	-0.000356951	-0.000117895	-0.000424444	-0.00111043	-0.00139561	-0.000418627	-0.000235007
rs78520578	15	48913386	15q21.1	FBN1	0.0035631	0.00342216	0.00109352	0.00222073	0.0014234	0.000925757	0.00159751	0.0014367	0.000642668	0.000166477	0.00206629
rs58646822	15	62806134	15q22.2	TLN2	0.000284037	0.000146745	1.52857e-05	2.20289e-06	0.000300928	5.04321e-05	0.00017796	-3.47464e-06	-4.06774e-06	4.90647e-05	4.43347e-05
rs1387385	15	63269446	15q22.2	TPM1	-0.000864667	0.000160593	-0.00148446	-0.000575048	-0.000431367	-0.000379741	-0.000324429	-0.000470291	-0.000239815	-0.000178337	-0.000309599
rs2306022	15	68628163	15q23	ITGA11	-1.54168e-05	-4.46537e-07	-3.10084e-05	2.41143e-05	-1.84346e-05	-1.56459e-06	-1.61437e-05	3.32931e-05	6.41148e-07	-2.15696e-06	-6.46971e-06
rs80039904	15	70194153	15q23	TLE3	0.00197319	0.00254488	-0.000368279	0.000817999	-0.00101605	-0.000178487	0.000233037	0.000978244	-0.000433829	-0.000130726	1.55425e-05
rs2278614	15	71748402	15q23	THSD4	0.000195072	0.00038362	-0.000483132	-0.000507484	9.15917e-05	0.000197697	-0.000198586	-0.00046225	3.68872e-05	-0.000128846	0.00027964
rs34135577	15	71875797	15q23	THSD4	-0.000699428	0.000281163	-0.000565096	0.00247637	-0.000479009	0.000350226	-3.55763e-05	0.000254365	-2.6131e-05	-9.97599e-05	-0.000325242
rs1542879	15	71925114	15q23	THSD4	0.000239445	0.000396692	0.000702165	-0.00124736	-0.000487144	0.00138739	0.000707125	0.001804	0.000280955	4.02366e-06	0.00133456
rs56186310	15	81466197	15q25.1	IL16	0.000224195	1.73758e-05	-5.49225e-05	0.000155704	-1.1999e-05	-1.4071e-05	-6.13525e-05	0.000322125	0.000109072	3.05905e-06	0.000100056
rs190690350	16	51081021	16q12.1	SALL1	-0.000776024	-0.000506765	0.00113049	-0.000786993	-0.000484961	9.14901e-05	-9.71379e-05	1.19139e-06	-0.000136464	-0.000305145	-0.000253386
rs75678295	16	53607096	16q12.2	RPGRIP1L	-1.78344e-05	0.000189861	-0.000455009	0.0004802	0.000276483	-0.00113661	-0.000740326	-0.000955085	-0.000927613	0.000312336	-5.30665e-05
rs113961478	16	53656064	16q12.2	RPGRIP1L	1.11535e-05	-1.15345e-05	-5.40407e-05	-0.000267644	-0.000525112	-0.000169848	-0.000233411	0.000175857	0.000109956	-7.90797e-05	-0.00015954
rs9934435	16	54819468	16q12.2	IRX3	6.02167e-05	1.94397e-06	0.000360589	0.000246158	0.00122965	0.000398526	0.000256468	0.000774763	6.40845e-05	0.000231356	-7.30474e-05
rs13329766	16	66624438	16q21	CMTM2	-0.000250957	-0.000746271	0.000723109	3.68603e-05	3.79903e-05	1.38783e-06	-0.000229093	6.42905e-05	0.000238773	-0.000272362	0.000389718
rs2967237	16	72605586	16q22.2	ZFHX3	-0.000277506	-0.00197803	0.00133419	-0.000495909	0.000447455	0.00222936	0.000420644	0.00123211	-0.000887171	0.000912564	-0.000343427
rs6499581	16	72696112	16q22.2	ZFHX3	0.000554476	0.000714178	-0.00264622	-0.000697207	-0.000668731	-9.44087e-05	0.0007212	0.00122655	-0.000377259	0.00094928	0.000410169
rs79342471	16	86489844	16q24.1	FOXF1	-0.000183153	-0.000120123	2.64762e-05	6.41933e-05	0.000157305	-0.000138629	-0.000121553	-0.000277313	-0.000201772	3.72099e-05	3.18282e-05
rs1078523	17	40912760	17q21.31	RAMP2-AS1	0.000287673	0.000395689	0.000174131	-0.000133464	-0.000143768	-0.000277409	-6.91369e-05	8.36051e-05	-0.000134048	1.12676e-05	0.000177538
rs7218433	17	54304717	17q22	ANKFN1	0.000642225	4.10791e-05	8.37589e-05	-0.000409563	-3.99885e-05	-7.31602e-05	0.000387524	4.60455e-05	-0.00022659	1.33998e-05	-0.000444551
rs227731	17	54773238	17q22	NOG	-0.000711563	-0.00233863	0.000674249	0.000291374	0.00138251	1.38793e-06	-3.9275e-05	0.00120344	0.000109102	-0.000122898	-9.81274e-05
rs76641259	17	58930159	17q23.2	BCAS3	0.000505596	-0.000169877	0.000238139	0.000211851	0.00013818	0.000553439	0.000277278	0.000173392	0.000130619	-0.000184254	-1.96234e-05
rs72856781	17	68060451	17q24.3	KCNJ16	-0.000462308	-0.000752431	-0.00252085	0.000417932	-0.000188419	0.000307321	-9.21421e-06	-0.000461309	-0.000937423	0.00100715	4.35572e-05
rs34476511	17	68900264	17q24.3	KCNJ2	-0.000861491	-0.00120954	0.000248593	-0.000563868	-0.000162184	0.000670573	-0.000280999	-0.000523459	-0.000276686	-8.71493e-05	-0.000457587
rs9900242	17	69135631	17q24.3	SOX9	-0.000218196	-0.00037098	0.000114946	0.000468229	4.65549e-05	0.00229103	-8.09918e-08	0.000242274	-6.38204e-05	-9.53166e-06	-5.50216e-05
rs8068343	17	69447706	17q24.3	SOX9	0.000966156	-0.00375925	-0.00109324	0.00313929	0.00511324	0.0162727	0.00147078	0.00273022	0.0015667	0.000402306	0.000327611
rs74880650	17	69929414	17q24.3	SOX9	-0.000105293	0.000183336	-0.000331064	0.000518059	0.00010294	0.000241399	-1.35486e-05	-9.66076e-05	-0.000133867	-0.000117564	-5.84827e-05
rs2193052	17	70026137	17q24.3	SOX9	-8.4714e-06	-1.46217e-05	-4.39369e-06	1.21944e-05	4.1304e-06	8.38952e-05	1.09311e-07	1.25584e-06	2.46283e-07	1.91179e-06	3.02738e-06
rs12955754	18	8556126	18p11.22	RAB12	0.000135799	0.000290003	1.43768e-05	7.22785e-05	0.000150289	2.07188e-05	0.000147466	9.21788e-05	0.000178763	0.000147583	2.16063e-05
rs4800986	18	52842438	18q21.2	TCF4	0.000216508	-0.000188269	-0.000106711	-0.000154934	9.14699e-05	0.000128973	0.00018831	0.000195677	4.62754e-05	-6.21798e-06	6.1197e-05
rs73536726	19	30983438	19q12	ZNF536	-0.000450757	-0.000288704	-5.94218e-05	0.00023541	-0.00011537	5.40664e-05	-1.01646e-05	-0.000715353	-0.000135126	6.29719e-05	-1.12567e-06
rs7250869	19	33887405	19q13.11	PEPD	-0.000488409	-0.000698932	0.00036003	-0.000560866	-0.00174793	-4.21034e-05	-3.82254e-05	0.00128309	0.00104502	-0.000679286	0.00111638
rs287104	19	34290995	19q13.11	KCTD15	-0.00307498	-0.0015893	-0.00119693	-0.000178629	-0.00166161	-0.00383104	-0.0020369	-0.000502443	-0.000567087	-0.000176129	-0.000784062
rs4813837	20	7637098	20p12.3	HAO1	8.08437e-05	0.000630137	-0.000420763	0.000547847	0.000486237	0.000203876	4.10436e-05	9.44986e-05	4.63153e-05	-7.32729e-05	-1.58976e-05
rs195800	20	9972308	20p12.2	ANKEF1	-0.00108986	-0.00145678	-0.000566052	-0.00101317	-7.65412e-05	-0.00110386	-5.68128e-05	-0.000337384	-4.91871e-05	-0.000227316	1.50712e-05
rs3761292	20	21679930	20p11.22	PAX1	-0.00014753	-4.30598e-05	-3.22809e-05	5.43375e-05	8.23476e-05	0.000121213	-0.00019931	5.20188e-05	-0.000157168	1.67329e-05	2.24077e-05
rs73133563	20	21681092	20p11.22	PAX1	0.000467665	0.00201983	-2.83612e-05	0.000315784	0.00015601	0.000434347	-0.000151264	-0.000133255	-0.00042559	7.00826e-05	-0.00140032
rs761891	20	21879108	20p11.22	PAX1	0.000100946	0.000285734	-0.000596943	0.000308935	0.000274586	0.000181961	4.99123e-05	0.000397112	0.000284156	2.56724e-05	8.64281e-05
rs5840953	20	22277381	20p11.22	FOXA2	-0.000141098	-0.000536316	0.000279798	0.000190343	0.000837024	0.00112691	9.6199e-05	0.000247202	-0.000173978	2.11443e-05	-0.000131918
rs10460626	20	38098820	20q12	DHX35	0.00044126	-0.00311961	0.000295529	-0.00194365	0.00160031	0.000593625	0.000327934	0.00204988	0.00114728	-0.000162114	0.000237898
rs6124893	20	45549765	20q13.12	EYA2	-0.000986376	-0.000776936	0.00190912	0.00229536	-0.00147833	-0.00286468	-0.00124232	0.00126377	0.000855478	8.05142e-05	-0.000105548
rs6022644	20	52275147	20q13.2	ZNF217	4.55098e-05	-0.00012562	-0.000264993	0.000780796	0.000233178	0.000257372	2.26932e-05	7.03794e-05	-8.14074e-06	9.74984e-05	0.000187689
rs9980535	21	29842250	21q21.3	LINC00161	0.000204897	0.00241781	-0.00578677	-3.51932e-05	0.000329817	0.00534085	-0.000124343	0.000375286	0.00270613	-0.000254764	-0.000670608
rs1004164	21	36447889	21q22.12	RUNX1	-0.000409243	6.41409e-06	-0.000142501	1.55105e-05	-2.01877e-05	-0.000674647	-5.22904e-05	-0.00191191	-0.00073123	0.000384346	0.000579814
rs7281993	21	37072139	21q22.12	RUNX1	-0.0011077	-0.000256747	-0.00118006	-0.000117874	-0.000587677	-7.22896e-05	-0.000476891	0.000382686	0.000297867	-3.87508e-05	-0.000467025
rs61658192	23	18096011	Xp22.13	BEND2	0.00075896	-0.000232658	-0.000131592	0.000240777	0.00138906	0.00268462	0.000955322	0.000455826	0.000107157	1.54297e-05	0.000990786
rs11795655	23	35219939	Xp21.1	FAM47B	-0.000180585	0.00017428	-7.57957e-05	0.000314427	0.00015573	-8.93935e-05	-3.31658e-05	-0.000121341	-3.45739e-05	5.92196e-05	-5.3239e-06
rs4354461	23	68314619	Xq13.1	PJA1	3.18281e-05	3.2393e-05	7.19846e-05	-2.86597e-05	-1.35025e-05	-8.37334e-05	-1.82392e-05	-5.08748e-06	-6.00267e-06	2.08295e-06	-2.46509e-06
rs66535024	23	136949354	Xq26.3	ZIC3	0.00134238	0.00135923	0.00148529	-5.73658e-05	-0.000117037	-4.13139e-05	3.17555e-05	-6.40926e-05	0.000323151	4.73034e-05	0.00124348
	Threshold				0.00411019	0.00422228	0.00310437	0.0114846	0.00469334	0.00473905	0.00292154	0.00327561	0.00230184	0.00107769	0.00225687
	13 variants mainly associated with EAS-FS are colored in red

## Sheet: ST6
Supplementary Table 6. The Standard deviation (SD) of East-Asian facial similarity (EAS-FS) of 244 lead variants in whole face and 10 anatomical regions
Legend: For each lead variant, the table provides the basic information (rsid, chromosome, position (GRCh37/hg19), cytogenetic band, and the annotated genes), and standard deviation of the EAS-FS in each segment correspoding to anatomic facial regions. The 13 variants mainly associated with EAS-FS and their correspoding regions are colored in red.
Chr	Pos（hg19)	Locus	RSID	Candidate.gene	Seg1	Seg5	Seg7	Seg16	Seg17	Seg18	Seg19	Seg24	Seg25	Seg26	Seg27
1	2803806	1p36.32	rs2377039	TTC34	0.91	0.9	0.16	0.06	0.27	0.36	0.11	0.78	0.08	0.45	0.04
1	3253839	1p36.32	rs7516137	PRDM16	1.31	0.63	-0.27	-0.01	0	2.72	0.41	0.37	0.25	0.84	0.72
1	11002956	1p36.22	rs113365915	CASZ1; C1orf127	0.38	0.33	1.09	-0.18	-0.49	-0.36	-0.33	0.31	-0.31	0.43	-0.04
1	16083898	1p36.21	rs71631750	FBLIM1	-0.05	-0.22	0.13	0.03	-0.11	-0.22	-0.23	0.07	-0.09	0	-0.2
1	18996519	1p36.13	rs111467622	PAX7	-0.57	-0.73	0.74	0.01	-0.16	-0.44	-0.44	0.03	-0.22	-0.83	-0.16
1	19762466	1p36.13	rs4912094	CAPZB	-0.2	-0.01	0.08	0.02	-0.11	-0.25	-0.1	-0.11	-0.15	-0.07	-0.06
1	53970693	1p32.3	rs72906949	GLIS1	1.03	0.22	1.87	-0.07	0.17	0.39	0.13	0.25	0.24	-0.04	0.86
1	53999509	1p32.3	rs3887651	GLIS1	1.84	1.64	-0.74	0.2	1.14	2.05	0.92	0.68	1.24	0.51	0.92
1	54062273	1p32.3	rs2948053	GLIS1	-0.73	-0.08	-0.61	0.65	1.3	-0.06	0.38	-0.11	-0.68	0.09	0.49
1	60994215	1p32.1	rs12562360	C1orf87	-0.17	-0.1	-0.3	0.12	-0.41	-0.56	-0.49	-0.11	-0.28	0.1	0.05
1	68862622	1p31.3	rs3125927	RPE65	-1.74	0.16	-1.81	0.91	-0.49	-0.4	0.24	0.14	-0.82	-2.23	0.06
1	75584009	1p31.1	rs6669519	LHX8	7.3	4.61	3.9	0.72	0.62	4.61	2.2	5.32	2	3.58	0.15
1	118769603	1p12	rs72631743	SPAG17	-0.58	-0.5	-0.1	0.01	0.05	-0.56	-0.7	0.71	0.47	1.98	-0.19
1	119146085	1p12	rs9661038	TBX15	-1.02	-1.28	0.22	0.49	0.56	0.01	-0.05	0.2	-0.23	-0.94	-0.16
1	119502774	1p12	rs10923710	TBX15	1.12	-3.23	-3.37	0.63	2.14	0.24	10.48	1.94	0.09	4.42	1.74
1	119508412	1p12	rs1779445	TBX15	0.03	-0.05	-0.39	0	-0.06	-0.19	0.35	0.21	-0.2	0.76	-0.16
1	150716112	1q21.3	rs375911694	CTSS	-0.41	-0.49	0.22	0.06	-0.36	-0.21	-0.22	-0.26	-0.1	-0.2	-0.22
1	165300839	1q23.3	rs1506948	LMX1A	-0.24	-0.09	0.02	-0.01	-0.14	-0.11	-0.1	-0.11	-0.05	-0.29	-0.07
1	197351039	1q31.3	rs2476023	CRB1	-0.27	-0.51	0.13	-0.17	-0.04	-0.14	-0.06	-0.07	-0.11	-0.05	-0.03
1	245378575	1q44	rs12042657	KIF26B	0.17	0.31	0.24	-0.23	-0.24	0.25	0.07	0.13	0.49	-0.2	-0.08
2	8721867	2p25.1	rs3856440	ID2	1.01	0.22	0.07	-0.34	-0.41	0.9	-0.1	0.33	0.39	-0.41	-0.22
2	19524172	2p24.1	rs6725667	OSR1	-0.66	-1.17	0.07	0.24	0.72	0.52	0.46	-0.9	1.23	-2.32	-1.61
2	42194758	2p21	rs2374385	PKDCC	-0.66	-0.31	0.93	-0.48	-0.58	1.27	-0.54	-1.4	0.22	-0.64	-0.19
2	45269086	2p21	rs2342419	SIX2	-0.39	0.49	0.31	-0.12	-0.36	0.01	-0.61	-0.04	-0.1	-0.09	-0.9
2	56012214	2p16.1	rs2009262	EFEMP1	3.25	0.96	-7.68	4.13	11.54	-0.12	4.72	0.27	1.44	7.4	1.77
2	66085159	2p14	rs13403156	SPRED2	1.73	0.73	1.11	0.29	0.26	-0.34	-0.31	-0.8	0.34	0.83	1.03
2	67898936	2p14	rs72621585	ETAA1	0.07	0.02	1.79	0.18	0.5	-0.47	-0.05	0.46	0.71	0.06	0.18
2	71830689	2p13.2	rs1529409	DYSF	-0.16	0.01	0.08	0.03	-0.11	-0.16	-0.08	-0.09	-0.14	-0.07	-0.05
2	104057121	2q12.1	rs6745909	TMEM182	-0.01	0.19	0.14	0.07	-0.08	-0.2	-0.11	-0.07	-0.07	0.06	0.07
2	104653581	2q12.1	rs13426125	LOC100287010	-0.03	0.11	0.08	0.03	-0.07	-0.15	-0.06	-0.03	-0.07	-0.02	0.02
2	109513601	2q12.3	rs3827760	EDAR	1.91	-1.23	-0.46	-13.81	-4.64	-3.9	3.57	0.26	-0.04	0.64	6.97
2	119043036	2q14.2	rs2422241	INSIG2	0.46	0.13	0.24	0.18	0.01	-0.13	0.09	0.09	-0.04	0.47	0.12
2	119452635	2q14.2	rs332734	EN1	0.25	0.26	0.49	0.06	0	-0.09	-0.07	-0.13	0.09	0.28	0.17
2	129751723	2q14.3	rs2044473	LOC101927881	1.23	1.6	1.56	-0.11	0.17	-0.13	-0.28	0.46	0.14	-0.27	-0.43
2	145675468	2q22.3	rs72854416	TEX41	-0.3	-0.1	0.01	-0.02	-0.02	-0.1	0.01	-0.26	-0.15	-0.09	0.07
2	146045060	2q22.3	rs17409597	TEX41	-0.56	-0.32	-0.16	-0.08	-0.19	-0.19	-0.27	-0.52	-0.41	-0.63	0.4
2	146586829	2q22.3	rs202205854	TEX41	-0.94	-0.46	0.09	-0.18	-1.18	-2.6	-0.77	-0.53	-0.9	-0.65	-0.6
2	176991924	2q31.1	rs6718516	HOXD9	2.46	3.57	1.1	0.44	0.35	0.77	0.39	-1.7	-1.06	0.63	-1.46
2	177111419	2q31.1	rs1524082	MTX2	-0.26	-0.12	-0.36	-0.15	-0.62	-0.3	0.13	1.18	0.16	-0.06	-0.27
2	177345714	2q31.1	rs12619464	MTX2	0.87	0.82	-0.32	0.43	0.66	-0.16	0.26	-0.25	-0.35	0.05	0.18
2	177368779	2q31.1	rs13408200	MTX2	0.63	1.75	-3.04	-0.03	1.89	1.23	-1.2	-4.12	-2.18	-0.36	0.19
2	200502849	2q33.1	rs10710424	LINC01877	-0.27	0.74	-0.62	-0.7	-2.65	2.04	0.22	2.3	1.91	-0.36	-1.44
2	222926192	2q36.1	rs348979	PAX3	-0.46	-0.38	-0.83	0.04	-0.16	0.82	-0.82	-1.58	-0.96	-0.24	-0.25
2	222962363	2q36.1	rs9288572	PAX3	0.29	-0.22	2.45	-0.4	-2.02	0.63	0.49	0.44	1.38	-0.07	-0.12
2	223056368	2q36.1	rs10209141	PAX3	0.24	1.19	-0.6	-0.03	-0.22	-0.75	0.24	-1.23	-1.84	1.63	1.18
2	223436184	2q36.1	rs111888358	FARSB	0.72	1.01	-0.01	0.14	0.05	0.07	0.36	0.18	0.25	-0.12	0.13
2	223542896	2q36.1	rs12614976	MOGAT1	1.57	1.07	1.35	0.24	0.78	0.09	0.94	0.48	0.99	0.35	0.8
2	232880971	2q37.1	rs12473319	DIS3L2	-0.95	-1.95	-0.2	-2.36	-0.77	0.66	-0.24	4.09	4.02	0.12	-0.57
2	239491831	2q37.3	rs2121905	TWIST2	-0.45	-0.03	-0.06	0.09	-0.08	-0.28	-0.18	-0.09	-0.21	-0.18	-0.27
2	239690223	2q37.3	rs116910218	TWIST2	-0.01	0.18	0.92	0.18	0.05	-0.11	-0.01	0.17	0.13	0.08	0.09
3	9308332	3p25.3	rs1828554	SRGAP3	0.03	0.41	0.51	0.13	-0.15	0.32	0.11	-0.27	-0.98	-0.52	-0.14
3	66896826	3p14.1	rs60889564	KBTBD8	0.4	0.23	-0.31	-0.04	-0.06	0.28	0.07	-0.42	-0.12	-0.33	-0.13
3	71239625	3p13	rs10713146	FOXP1	-0.64	-0.31	0.01	0.14	-0.17	0.1	-0.13	-0.48	-0.07	-0.41	0.02
3	86960554	3p12.1	rs36024188	VGLL3	0.41	-0.3	0.42	-0.06	-0.16	-0.15	0.4	0.59	0.29	2.26	0.26
3	87029924	3p12.1	rs73844434	VGLL3	-0.35	0.01	-0.06	0.01	-0.19	-0.44	-0.83	-0.02	-0.31	-0.06	-0.23
3	88880647	3p11.1	rs7431338	EPHA3	0.06	0.1	0.48	-0.06	-0.3	-0.47	-0.19	-0.13	-0.16	-0.04	-0.12
3	89035939	3p11.1	rs6765833	EPHA3	-0.26	-0.04	-0.49	0.03	-0.07	-0.13	-0.08	0.09	0.27	0.04	-0.14
3	128064118	3q21.3	rs4857879	EEFSEC	-0.76	0.3	-0.92	0.51	1.88	-0.1	0.31	-0.51	-0.99	1.15	-0.03
3	128201376	3q21.3	rs55686439	GATA2	-0.59	-0.51	0.02	-0.05	-0.26	-0.25	0.03	-0.21	0.04	0.09	-0.11
3	133820689	3q22.2	rs9812461	RYK	-0.32	-0.11	-0.11	-0.03	-0.08	0.23	-0.21	-0.1	-0.15	-0.29	-0.15
3	138668060	3q22.3	rs111414955	FOXL2	-0.38	-0.17	0	-0.02	-0.06	-0.15	-0.12	-0.08	0.05	-0.17	-0.16
3	138839901	3q23	rs72630201	BPESC1	-0.62	0.05	-0.11	-0.06	-0.06	-0.65	-1.03	-1.33	-0.62	-0.68	0.23
3	138946868	3q23	rs12632544	MRPS22	-1.25	-1.03	0.08	0.04	-0.69	2.01	-0.14	5.91	9.8	2.66	-9.67
3	157500853	3q25.32	rs9836369	SHOX2	1.41	1.12	-0.56	-0.01	0.76	0.33	0.67	0.59	0.1	0.34	0.46
3	177309024	3q26.32	rs552757	LINC00578	0.03	0.01	0.2	0.03	-0.05	-0.16	-0.03	0.08	-0.15	0.06	-0.01
3	184339099	3q27.1	rs12633616	EPHB3	0.18	0.3	0.24	-0.01	-0.13	0.11	-0.31	-0.51	-0.27	-0.07	-0.01
3	184445284	3q27.1	rs9844571	MAGEF1	-0.33	0.02	-0.24	0.02	-0.3	-0.05	-0.69	-0.04	-0.18	0.01	0.08
4	1005179	4p16.3	rs74921869	FGFRL1	0.43	0.6	0.34	-0.08	0.5	0.08	-0.15	0.22	-0.08	-0.06	0.18
4	4774124	4p16.2	rs371525829	MSX1	-0.41	-0.12	0.06	0.1	-0.06	-0.27	0.15	-0.14	-0.38	-0.01	-0.06
4	4794202	4p16.2	rs34998838	MSX1	0.07	0.27	0.03	-0.09	-0.29	0.09	-0.19	-0.11	0.05	-0.18	0.11
4	7204493	4p16.1	rs3815181	SORCS2	0.08	0.24	0.05	-0.02	-0.21	-0.23	-0.03	0.88	0.38	0.25	0.47
4	8711408	4p16.1	rs7434700	CPZ	0.38	-0.33	-0.19	-0.17	0.32	-0.27	0.72	-0.5	-0.18	0.19	0.17
4	18607550	4p15.31	rs1874285	LCORL	0.53	1.25	0.01	-0.25	-0.35	-0.73	-0.57	-1.33	0.65	-0.9	0.64
4	22394239	4p15.2	rs117922332	ADGRA3	0.09	0.09	0.33	0.05	-0.13	-0.35	0.01	0.21	0.15	0.13	-0.11
4	42393308	4p13	rs60442375	SHISA3	0.07	-0.43	-3.48	-0.84	-0.08	-0.29	1.01	0.43	0.32	-1.36	0.13
4	61371870	4q13.1	rs2203049	LPHN3	1.07	0.77	-0.74	0.78	2.22	0.17	1.08	0	0.69	0.07	0.41
4	111718067	4q25	rs6843082	PITX2	-1.71	-4.61	1.46	0.11	-1.72	-0.02	-0.24	-0.15	-0.17	0.69	0.64
4	112672623	4q25	rs326899	PITX2	0.57	0.84	-0.33	0.13	0.12	-0.51	0.31	0.17	-0.21	0.15	-0.33
4	121998104	4q27	rs7694450	NDNF	-0.54	-0.15	0.06	0.07	-0.03	-0.07	0.28	-0.26	-0.08	-1.36	-0.37
4	126951202	4q28.1	rs200087457	MIR2054	-0.09	-0.09	-0.18	0.03	-0.22	-0.29	0.36	0.09	-0.1	-0.04	-0.22
4	127810815	4q28.1	rs17011824	INTU	0.05	0	-0.35	-0.28	0.56	1.27	0.41	0.19	-0.13	1.36	0.02
4	127983463	4q28.1	rs4834173	INTU	-0.06	0.36	-0.15	-0.29	-0.37	0.4	-0.2	0.09	-0.21	-0.27	0.2
4	154828366	4q31.3	rs9995821	SFRP2	-0.15	0	0.08	0.03	-0.08	-0.17	-0.09	-0.09	-0.14	-0.06	-0.05
4	155204724	4q31.3	rs6834372	DCHS2	0.02	0.11	0.09	-0.04	-0.14	-0.08	-0.05	0.27	0.01	-0.09	-0.08
4	174469388	4q34.1	rs6814518	HAND2	-0.13	-0.05	0.13	0.19	-0.03	-0.19	-0.08	-0.11	-0.2	0.06	-0.05
5	1901205	5p15.33	rs17537048	IRX4	-0.2	-0.02	0.07	0.01	-0.09	-0.17	-0.09	-0.11	-0.14	-0.06	-0.05
5	4977136	5p15.32	rs40646	LINC01020	-0.14	0.05	-0.98	-0.46	-0.27	0.05	-0.16	-0.22	-1.23	-1.01	-0.43
5	44451269	5p12	rs7712213	FGF10	0.74	0.46	-0.44	0.01	-0.25	-0.15	-0.25	0.65	-0.01	-0.62	-0.73
5	82125335	5q14.2	rs2891934	MIR3977	-1.12	-1.54	0.89	-0.47	-1.34	-0.71	-2.46	-1.48	0.28	-0.48	0.42
5	94069803	5q15	rs880264	MCTP1	-0.74	-0.23	-0.3	0.02	-0.14	-0.61	-1.05	-0.96	0.26	-0.83	-0.29
5	128107907	5q23.3	rs13182341	FBN2	-0.48	-0.23	-0.16	0.07	-0.07	-0.12	-0.33	-0.14	-0.11	-0.29	-0.12
5	171128464	5q35.1	rs6555969	FGF18	-0.35	-0.1	0.01	0.03	-0.1	-0.16	-0.12	-0.21	-0.25	-0.15	0.01
5	173848018	5q35.2	rs6556132	MSX2	0.45	0.68	-0.4	-0.1	-0.14	0.03	0.07	0	-0.02	0.71	0.25
6	2145838	6p25.3	rs77646409	GMDS	0.69	0.55	0.2	0.13	0.58	-0.44	0.17	-0.31	0.03	0.06	0.14
6	2252322	6p25.3	rs13196306	GMDS	-0.38	-0.1	0.01	0.02	-0.17	-0.21	-0.18	-0.37	-0.2	-0.25	-0.06
6	2455730	6p25.2	rs60608799	GMDS	-0.18	-0.01	0.02	0.03	-0.08	-0.17	-0.1	-0.09	-0.12	-0.07	-0.05
6	39536622	6p21.2	rs4714260	KIF6	-0.1	0.03	0.11	0.06	-0.05	-0.14	-0.09	-0.08	-0.13	-0.04	-0.05
6	44816181	6p21.1	rs13206526	SUPT3H;RUNX2	0.31	0.47	0.58	0.08	0	-0.16	-0.1	-0.58	0.06	-0.27	0.04
6	50793671	6p12.3	rs2857487	TFAP2B	-0.17	-0.01	0.1	0.02	-0.09	-0.11	-0.09	-0.15	-0.09	-0.11	-0.05
6	50931059	6p12.3	rs9381919	TFAP2B	-0.12	0.21	0.08	0.13	-0.1	-0.54	-0.12	0	-0.43	-0.27	-0.36
6	51038157	6p12.3	rs1886569	TFAP2B	-1.72	-2.81	0.2	-0.22	-0.35	-0.69	-2.5	-1.17	0.37	-0.89	0.31
6	51704886	6p12.3	rs788509	PKHD1	-1.02	-1.08	-1.14	-0.16	-0.25	-0.08	-0.67	-0.08	-0.31	-0.45	-0.64
6	85313340	6q14.3	rs28880333	TBX18	-2.15	-1.48	0.53	-0.07	-0.34	-0.96	-0.34	-0.09	-0.71	-0.41	-0.87
6	85811665	6q14.3	rs147468294	TBX18	2.18	1.18	2.6	0.18	0.14	0.42	0.27	1.11	0.11	-0.22	0.38
6	91998112	6q15	rs36126080	MIR4643	-1.05	-0.03	-1.38	0.09	0.1	-0.24	-0.38	-2.69	-0.93	-1.54	-0.25
6	106188818	6q21	rs6568401	PRDM1	-0.08	0.04	0.48	-0.1	0	-0.22	-0.08	0.07	0.11	-0.56	-0.12
6	113186636	6q21	rs73547403	RFPL4B	-0.06	-1.64	0.22	-0.14	-0.53	-0.16	0.57	-0.33	0.48	0.31	0.3
6	127190932	6q22.33	rs6940295	RSPO3	-0.02	0.11	0.08	0.08	-0.06	-0.12	-0.07	-0.07	-0.12	-0.05	-0.01
6	133639892	6q23.2	rs17062339	EYA4	-2.15	-1.35	-1.14	0.48	-0.17	0.57	0.06	-2.45	-0.35	-2.47	0.4
6	136260450	6q23.3	rs1418341	PDE7B	-0.96	-0.47	-0.52	0.04	-0.02	0.06	-0.12	0.23	0.45	-0.42	-0.22
6	138871197	6q23.3	rs4895534	NHSL1	0.48	1.24	0.66	0.01	-0.5	-0.67	0.15	0.3	-0.13	0.26	0
7	18733748	7p21.1	rs17139675	HDAC9	0.51	0.84	0.3	0.25	-0.35	-1.35	-0.86	0.18	-0.38	-1.55	-0.17
7	18794346	7p21.1	rs1178171	HDAC9	2.31	0.79	1.95	0.97	-0.51	-2.89	-0.49	0.54	0.47	2.25	-0.02
7	33321872	7p14.3	rs1420150	BBS9	-0.26	0.24	-0.15	0.05	-0.52	-0.21	-0.33	-0.75	-0.31	-0.7	-0.17
7	34162983	7p14.3	rs1362462	BMPER	-0.32	0.15	-0.04	0.09	-0.51	-0.23	-0.22	-0.42	-0.17	-0.12	-0.15
7	42055499	7p14.1	rs72586392	GLI3	-0.26	0.65	0.01	0.24	0.65	-0.34	-0.5	-0.22	-0.24	0.07	0.24
7	81245568	7q21.11	rs28584384	HGF	0.2	0.32	0.37	0.14	0.04	-0.43	-0.04	0.11	0.05	0	0.19
7	81281845	7q21.11	rs11972687	HGF	-1.93	-1.97	-1.13	-0.05	0.53	1.81	-0.66	-0.56	0.04	-1.29	-1.41
7	96150233	7q21.3	rs62470051	DLX5	0.13	-0.21	-0.04	0.26	0.2	-0.2	0.11	-0.1	-0.15	-0.08	0.37
7	134644454	7q33	rs12707194	CALD1	-0.51	-0.09	-0.13	-0.01	-0.09	-0.25	-0.23	-1.21	-0.6	-0.07	-0.29
8	9087248	8p23.1	rs111847181	PPP1R3B	1.84	0.87	-0.45	-0.09	1.9	3.3	1.72	0.28	-1.35	0.16	1.97
8	27729914	8p21.1	rs77139634	SCARA5	-0.67	-0.5	0.01	0.01	-0.21	0.39	-0.16	-0.57	-0.4	-0.14	0.02
8	60621509	8q12.1	rs7833284	CA8	-1.59	0.1	-0.94	-0.3	-0.92	-0.52	-0.89	-1.8	-2.16	-1.44	0.33
8	72466324	8q13.3	rs745578	EYA1	2.48	1.39	2.6	1.21	0.64	-0.4	-1.23	3.63	4.82	-0.62	-1.86
8	77695388	8q21.11	rs6985531	ZFHX4	-0.61	0.31	-0.78	0.38	-0.19	0.45	-0.43	-0.19	0.1	-0.17	0.01
8	93673799	8q22.1	rs10808653	C8orf83	1.06	1.29	-0.23	-0.1	-1.13	-2.27	-2.29	0.95	0.41	1.68	-3.24
8	99247467	8q22.2	rs7841749	NIPAL2	0.25	0.17	-1.09	0.15	0.48	0	0.6	0.64	0.46	1.04	-0.58
8	100026275	8q22.2	rs12547849	VPS13B	-4.35	-3.31	0.16	0.39	-0.51	-0.36	-1	1.49	-0.5	-2.45	-2.42
8	108972019	8q23.1	rs629334	RSPO2	-0.15	-0.08	0.12	0.11	0.05	-0.13	0.16	-0.12	-0.1	-0.01	0.1
8	109407393	8q23.1	rs6983169	EMC2	0.75	0.18	0.01	0.04	0.66	0.94	0.2	-0.4	-0.19	0.48	1.15
8	121986318	8q24.12	rs58116396	SNTB1	0.65	-0.33	0.06	-0.08	-0.06	-0.77	-0.22	1.1	0.85	0.44	-0.61
8	123015916	8q24.13	rs7821044	HAS2	-1.83	-1.17	0.83	0.04	-0.29	-0.54	-1.1	-1.62	-1.34	-0.56	-1.07
8	123462066	8q24.13	rs16897057	ZHX2	0.14	0.02	0.24	0.03	-0.13	0.03	-0.04	0.37	0.34	-0.26	0.28
8	129837463	8q24.21	rs12544443	LINC00976	0.66	0.47	0.11	2.89	0.32	0.42	-0.29	1.5	2.08	-0.22	-0.71
8	144333836	8q24.3	rs4495442	ZFP41	-0.28	-0.18	-0.17	-0.02	-0.11	-0.06	0.04	-0.08	-0.11	-0.11	-0.04
9	4290544	9p24.2	rs10814915	GLIS3	0.01	0.13	0.31	0.03	-0.11	-0.14	-0.04	0.12	-0.1	-0.09	-0.12
9	14038763	9p23	rs7867828	NFIB	0.07	-0.19	-0.39	-0.26	0.01	-0.33	-0.13	-0.48	-0.12	-0.46	0.38
9	16960741	9p22.2	rs13287985	BNC2	-1.11	-1.91	0.05	-0.11	0.35	-0.12	-0.09	-0.33	-0.16	-0.95	-0.38
9	20308166	9p21.3	rs7851959	MLLT3	1.35	1.36	0.93	0.04	-0.21	0.55	-0.11	1.55	0.09	-0.33	-0.76
9	94474621	9q22.31	rs78492399	ROR2	-0.53	-0.4	-0.24	-0.12	-0.22	0.24	-0.07	-0.75	-0.27	-0.5	0.16
9	97869692	9q22.32	rs2282216	FANCC	-0.42	-0.53	0.03	0.07	-0.33	0.03	-0.09	0.03	-0.72	0.1	0.24
9	98275789	9q22.32	rs75614054	PTCH1	-0.17	-0.05	0.08	0.04	-0.06	-0.17	-0.06	-0.05	-0.13	-0.1	-0.06
9	116642091	9q32	rs10817529	ZNF618	-0.75	-0.39	0.64	-0.02	-1.21	-0.35	-0.14	-0.58	-0.38	-0.7	-0.2
9	125665127	9q33.2	rs200607307	RC3H2	1.82	0.5	-0.62	-0.03	1.89	0.73	-0.05	-0.11	-1.81	-3.53	0.06
9	129559935	9q33.3	rs7871091	LMX1B	-0.89	-4.24	1.63	-0.16	1.7	0.98	1.95	0.76	0.7	0.61	0.87
10	15519799	10p13	rs2122934	ITGA8	0.24	0.22	0.25	0.37	0.18	-0.06	0.02	-0.09	-0.21	0.3	0.05
10	27897769	10p12.1	rs1107307	MKX	-0.05	0.02	0.34	0.46	0.08	-0.51	-0.25	-0.65	-0.45	0.05	0.17
10	27961690	10p12.1	rs4749259	MKX	0.02	-1.15	-2.48	-1.15	-0.34	-0.3	0.48	-2.35	0.48	3.02	0.75
10	28010605	10p12.1	rs12258832	MKX	1.48	1.25	-1.51	0.11	0.32	0.26	0.34	-0.88	-0.6	3.44	1.79
10	63825561	10q21.2	rs7899626	ARID5B	0.32	0.8	0.36	0.17	0.1	-0.12	-0.08	-0.1	-0.2	-0.2	0
10	78158137	10q22.3	rs1907337	C10orf11	0.13	2.14	-0.97	1.04	-0.11	-0.4	-2.9	-1.2	-0.44	-0.19	-0.73
10	96108774	10q23.33	rs1093316	NOC3L	0.59	0.33	0.29	0.07	0.17	-0.07	-1.29	0.44	-0.14	-0.45	-0.2
10	100452838	10q24.2	rs544784	HPSE2	-0.16	0.05	-0.05	0.04	-0.07	-0.14	-0.06	-0.21	-0.22	-0.1	-0.03
10	119284408	10q26.11	rs12570134	EMX2OS	1.75	1.81	0.68	-0.1	-0.15	0.19	1.37	0.96	1.69	0.63	0.04
10	119767504	10q26.11	rs3740550	RAB11FIP2	1.27	0.46	0.35	0.11	0.45	-0.33	3.35	0.65	1.28	-0.16	1.06
10	127837659	10q26.2	rs1674906	ADAM12	-1.33	-0.19	-0.4	-0.26	-0.95	-0.47	-0.29	-1.21	-0.18	0.31	0.07
11	6257310	11p15.4	rs5789450	FAM160A2	0.09	0.23	0.27	0.06	-0.09	-0.23	-0.1	-0.1	-0.13	0.08	-0.25
11	16025573	11p15.2	rs7938500	SOX6	0.21	0.94	-0.72	0.05	-0.16	2.03	0.56	-0.53	-0.24	-0.85	1.08
11	44471561	11p11.2	rs7937453	ALX4	2.68	1.77	-0.07	0	0.79	0.22	0.58	2.4	1.34	0.23	-0.85
11	86634170	11q14.2	rs34997377	FZD4	-0.52	-0.59	0.16	0.3	0.47	-0.03	0.01	-0.45	-0.53	0.1	-0.07
11	128236637	11q24.3	rs76482532	ETS1	-0.18	0.09	0.87	0.12	-0.06	-0.22	0.05	0.19	0.34	-0.32	0.28
12	28100554	12p11.22	rs10771396	PTHLH	0.22	0.59	0.21	0.2	0.03	-0.05	0.47	-0.5	-0.45	0.38	0.28
12	28239898	12p11.22	rs10771405	PTHLH	1.36	0.82	0.97	-0.04	0.27	-0.04	0.37	2.41	0.91	0.51	1.79
12	28525197	12p11.22	rs11049559	CCDC91	-0.07	-0.05	0.1	0.01	-0.09	-0.26	0	-0.17	-0.05	0.1	-0.11
12	65843897	12q14.3	rs34599763	MSRB3	-1.01	-0.72	-0.28	-0.68	0.44	-0.93	0.78	-0.78	-0.95	-0.17	1.2
12	66114630	12q14.3	rs11175885	RPSAP52	1.65	0.28	0.93	-1.89	-0.84	1.17	1.08	0.05	-0.7	0.43	-0.41
12	66340703	12q14.3	rs35084099	HMGA2	0.74	0.37	1.46	-0.15	0.08	-0.12	0.24	-0.14	-0.03	0.43	0.54
12	66446108	12q14.3	rs7975189	HMGA2	-0.35	-0.03	-0.06	0.28	0.02	0.19	-0.36	-0.28	-0.42	0.04	0.23
12	84356493	12q21.31	rs11116137	TMTC2	-0.35	-0.09	-0.15	-0.09	-0.12	-0.12	-0.11	-0.27	-0.32	-0.18	-0.01
12	84429631	12q21.31	rs4128162	SLC6A15	-0.83	-0.78	0.35	-0.44	-0.9	0.33	-0.62	-0.09	-0.4	-0.51	0.32
12	85714770	12q21.31	rs10862968	ALX1	0.4	0.56	-0.34	-0.12	-1.08	0.23	-0.55	0.36	0.31	-0.14	0.17
12	85787008	12q21.31	rs10862979	ALX1	-0.27	0.67	-0.31	-0.11	-0.18	0.62	-0.4	-1.01	-0.77	-0.3	-0.02
12	112768080	12q24.13	rs34034288	HECTD4	-0.94	-4.15	-1	-0.07	1.36	-0.07	-1.67	-0.84	1.74	-1.53	-1.6
12	115418799	12q24.21	rs1317715	TBX3	0.62	0.65	0.85	0.27	-0.5	0.36	-0.27	-0.44	-0.45	-0.17	-0.32
12	124715164	12q24.31	rs11057528	ZNF664-FAM101A	-0.68	-0.45	-0.24	0.04	-0.15	-0.25	-0.32	-0.28	-0.39	-0.5	-0.17
12	130720444	12q24.33	rs34875425	FZD10	-0.21	0.3	-0.05	0.06	-0.26	0.06	-0.27	0.01	-0.04	-0.43	0.09
13	95364337	13q32.1	rs2253604	SOX21	0.15	0.88	0.46	-0.24	-0.27	0.08	-0.2	0.06	0.13	-0.2	-0.11
13	95742383	13q32.1	rs7331308	ABCC4	0.01	0.1	0.23	0.07	0.03	-0.02	-0.09	-0.04	-0.07	0.13	-0.08
13	100393276	13q32.3	rs9557284	CLYBL	-0.87	-1.8	1.07	-0.27	-0.47	-0.55	-0.11	1.06	-1.11	-0.6	-0.05
13	106814040	13q33.2	rs75493661	LINC00460	-0.09	0.2	-0.01	0.26	0.03	0.82	0.03	0.03	-0.42	0.22	0.32
13	110376963	13q34	rs12429168	IRS2	-0.23	0.15	0.14	0.03	-0.19	-1.48	-0.19	-0.09	-0.22	-0.07	-0.11
14	23448918	14q11.2	rs75208169	AJUBA	-0.34	-0.45	-0.02	-0.14	-0.37	-0.14	-0.07	0.04	-0.09	-0.28	-0.05
14	35121086	14q13.1	rs10136118	SNX6	0.65	0.15	-0.63	0.29	0.58	0.02	-0.2	0.04	0.21	-0.35	-0.16
14	53964998	14q22.1	rs4901427	DDHD1	-0.19	-0.04	0.04	0.04	-0.04	-0.15	-0.08	-0.06	-0.12	-0.08	-0.07
14	54406741	14q22.2	rs34763890	BMP4	-0.97	0.33	-0.14	0.36	0.45	-0.09	0.89	-2.6	-1.85	-0.87	0.09
14	54610759	14q22.2	rs811156	BMP4	-0.79	-0.72	-0.01	0.02	-0.58	-1.73	0.08	-1.56	0	-1.17	-0.63
14	61164846	14q23.1	rs1951109	SIX4	-0.58	-0.73	-0.38	-0.09	-0.26	0.22	-0.4	-0.29	-0.09	-0.42	1
14	61664530	14q23.1	rs12879559	SIX4	-0.13	-0.29	0.21	-0.03	-0.15	-0.31	-0.08	0.16	0.06	0	-0.27
14	85139058	14q31.3	rs56246022	SNORD3P3	0.18	0.12	-0.01	-0.06	-0.04	-0.13	0.06	0.25	0.14	0.22	0.48
14	98122190	14q32.2	rs58569036	LINC02291	-0.08	-0.21	-0.34	-0.12	-0.05	0.08	-0.06	0.22	0.41	0.07	-0.05
14	98189192	14q32.2	rs368145116	C14orf64	-0.36	-0.18	-0.18	-0.1	-0.16	-0.61	-0.09	-0.65	-0.8	0.14	-0.26
14	98935548	14q32.2	rs17096983	BCL11B	-0.17	0.01	0.53	0.36	-0.05	-0.11	-0.05	0.44	-0.04	-0.14	-0.39
15	26490867	15q12	rs147599640	GABRB3	-0.04	0.14	0.51	0.15	-0.02	-0.2	-0.17	0.02	-0.13	-0.12	-0.01
15	35973421	15q14	rs16961407	DPH6-DT	0.5	0.72	1.12	-0.03	-0.16	-0.3	0	-0.59	-0.18	1.13	2.03
15	36566788	15q14	rs12909674	C15orf41	0.34	1.44	0.01	0.87	0.08	-0.48	-0.56	-0.29	0.12	0.95	1.1
15	37282362	15q14	rs79076868	MEIS2	-1.36	-0.36	0.6	-0.11	-0.29	-0.24	-0.47	-1	-1.78	-1.09	-0.32
15	48913386	15q21.1	rs78520578	FBN1	2.21	2.09	0.96	0.52	0.72	0.37	1.38	1.08	0.62	0.35	2.36
15	62806134	15q22.2	rs58646822	TLN2	0.03	0.1	0.1	0.03	0.09	-0.14	0.08	-0.09	-0.14	0.06	0
15	63269446	15q22.2	rs1387385	TPM1	-0.73	0.11	-1.1	-0.1	-0.33	-0.39	-0.38	-0.47	-0.42	-0.5	-0.41
15	68628163	15q23	rs2306022	ITGA11	-0.17	0.01	0.06	0.04	-0.1	-0.17	-0.09	-0.06	-0.13	-0.07	-0.06
15	70194153	15q23	rs80039904	TLE3	1.15	1.55	-0.21	0.21	-0.66	-0.27	0.13	0.7	-0.65	-0.38	-0.03
15	71748402	15q23	rs2278614	THSD4	-0.03	0.24	-0.3	-0.08	-0.03	-0.05	-0.26	-0.47	-0.09	-0.38	0.28
15	71875797	15q23	rs34135577	THSD4	-0.62	0.18	-0.37	0.58	-0.36	0.03	-0.11	0.12	-0.17	-0.3	-0.43
15	71925114	15q23	rs1542879	THSD4	0	0.25	0.65	-0.25	-0.36	0.64	0.56	1.37	0.2	-0.05	1.5
15	81466197	15q25.1	rs56186310	IL16	-0.01	0.02	0.04	0.07	-0.09	-0.18	-0.14	0.17	-0.01	-0.05	0.07
16	51081021	16q12.1	rs190690350	SALL1	-0.67	-0.3	0.99	-0.14	-0.36	-0.11	-0.17	-0.09	-0.3	-0.81	-0.34
16	53607096	16q12.2	rs75678295	RPGRIP1L	-0.17	0.12	-0.28	0.14	0.07	-0.83	-0.75	-0.87	-1.23	0.7	-0.11
16	53656064	16q12.2	rs113961478	RPGRIP1L	-0.15	0	0.04	-0.03	-0.38	-0.27	-0.29	0.05	-0.01	-0.25	-0.24
16	54819468	16q12.2	rs9934435	IRX3	-0.12	0.01	0.37	0.08	0.61	0.06	0.15	0.54	-0.06	0.5	-0.13
16	66624438	16q21	rs13329766	CMTM2	-0.32	-0.45	0.66	0.04	-0.06	-0.17	-0.29	-0.04	0.15	-0.73	0.4
16	72605586	16q22.2	rs2967237	ZFHX3	-0.34	-1.2	1.15	-0.08	0.17	1.12	0.3	0.91	-1.18	2.17	-0.45
16	72696112	16q22.2	rs6499581	ZFHX3	0.21	0.44	-2.04	-0.12	-0.46	-0.22	0.58	0.91	-0.58	2.26	0.43
16	86489844	16q24.1	rs79342471	FOXF1	-0.28	-0.06	0.11	0.04	0	-0.25	-0.19	-0.32	-0.37	0.03	-0.01
17	40912760	17q21.31	rs1078523	RAMP2-AS1	0.03	0.25	0.22	0	-0.17	-0.33	-0.14	-0.02	-0.29	-0.03	0.16
17	54304717	17q22	rs7218433	ANKFN1	0.27	0.03	0.15	-0.06	-0.11	-0.21	0.27	-0.05	-0.4	-0.03	-0.57
17	54773238	17q22	rs227731	NOG	-0.63	-1.42	0.63	0.09	0.7	-0.17	-0.12	0.89	-0.01	-0.36	-0.16
17	58930159	17q23.2	rs76641259	BCAS3	0.18	-0.1	0.27	0.08	-0.01	0.15	0.17	0.05	0.02	-0.51	-0.07
17	68060451	17q24.3	rs72856781	KCNJ16	-0.46	-0.45	-1.94	0.12	-0.19	0.01	-0.09	-0.47	-1.24	2.41	0
17	68900264	17q24.3	rs34476511	KCNJ2	-0.73	-0.73	0.28	-0.09	-0.18	0.22	-0.34	-0.52	-0.46	-0.27	-0.58
17	69135631	17q24.3	rs9900242	SOX9	-0.3	-0.22	0.18	0.13	-0.06	1.16	-0.08	0.11	-0.21	-0.08	-0.11
17	69447706	17q24.3	rs8068343	SOX9	0.49	-2.28	-0.79	0.73	2.81	9.26	1.26	2.13	1.71	0.92	0.33
17	69929414	17q24.3	rs74880650	SOX9	-0.23	0.12	-0.18	0.15	-0.03	-0.03	-0.09	-0.17	-0.29	-0.35	-0.12
17	70026137	17q24.3	rs2193052	SOX9	-0.16	0	0.08	0.03	-0.08	-0.12	-0.08	-0.09	-0.13	-0.06	-0.05
18	8556126	18p11.22	rs12955754	RAB12	-0.07	0.18	0.1	0.05	0	-0.16	0.05	-0.02	0.08	0.3	-0.02
18	52842438	18q21.2	rs4800986	TCF4	-0.01	-0.11	0	0	-0.03	-0.09	0.09	0.07	-0.08	-0.08	0.02
19	30983438	19q12	rs73536726	ZNF536	-0.46	-0.17	0.04	0.08	-0.15	-0.14	-0.09	-0.67	-0.29	0.09	-0.05
19	33887405	19q13.11	rs7250869	PEPD	-0.48	-0.42	0.37	-0.09	-1.08	-0.19	-0.12	0.95	1.1	-1.72	1.25
19	34290995	19q13.11	rs287104	KCTD15	-2.2	-0.96	-0.88	-0.01	-1.03	-2.38	-1.94	-0.5	-0.8	-0.49	-0.96
20	7637098	20p12.3	rs4813837	HAO1	-0.1	0.39	-0.25	0.15	0.19	-0.05	-0.04	-0.01	-0.08	-0.24	-0.07
20	9972308	20p12.2	rs195800	ANKEF1	-0.88	-0.88	-0.37	-0.19	-0.13	-0.8	-0.13	-0.37	-0.19	-0.62	-0.03
20	21679930	20p11.22	rs3761292	PAX1	-0.26	-0.02	0.06	0.04	-0.04	-0.1	-0.26	-0.05	-0.32	-0.02	-0.02
20	21681092	20p11.22	rs73133563	PAX1	0.15	1.24	0.06	0.1	0	0.08	-0.22	-0.2	-0.64	0.11	-1.68
20	21879108	20p11.22	rs761891	PAX1	-0.09	0.18	-0.4	0.1	0.07	-0.06	-0.03	0.23	0.2	0	0.05
20	22277381	20p11.22	rs5840953	FOXA2	-0.25	-0.32	0.31	0.07	0.39	0.49	0.01	0.11	-0.34	-0.01	-0.2
20	38098820	20q12	rs10460626	DHX35	0.14	-1.89	0.32	-0.4	0.82	0.18	0.22	1.58	1.22	-0.46	0.23
20	45549765	20q13.12	rs6124893	EYA2	-0.81	-0.46	1.62	0.54	-0.92	-1.82	-1.21	0.93	0.87	0.14	-0.17
20	52275147	20q13.2	rs6022644	ZNF217	-0.13	-0.07	-0.13	0.2	0.05	-0.02	-0.06	-0.03	-0.14	0.18	0.17
21	29842250	21q21.3	rs9980535	LINC00161	-0.02	1.48	-4.56	0.02	0.1	2.92	-0.19	0.21	3.06	-0.68	-0.83
21	36447889	21q22.12	rs1004164	RUNX1	-0.43	0.01	-0.03	0.03	-0.1	-0.56	-0.13	-1.65	-1	0.88	0.63
21	37072139	21q22.12	rs7281993	RUNX1	-0.9	-0.15	-0.86	0	-0.42	-0.21	-0.51	0.22	0.22	-0.16	-0.59
23	18096011	Xp22.13	rs61658192	BEND2	0.35	-0.13	-0.02	0.08	0.7	1.38	0.79	0.28	-0.01	-0.02	1.1
23	35219939	Xp21.1	rs11795655	FAM47B	-0.28	0.11	0.02	0.1	0	-0.22	-0.11	-0.19	-0.18	0.08	-0.06
23	68314619	Xq13.1	rs4354461	PJA1	-0.14	0.03	0.14	0.02	-0.09	-0.22	-0.1	-0.1	-0.14	-0.06	-0.05
23	136949354	Xq26.3	rs66535024	ZIC3	0.73	0.84	1.28	0.02	-0.15	-0.19	-0.05	-0.14	0.25	0.06	1.39
13 variants mainly associated with EAS-FS are colored in red

## Sheet: ST7
Supplementary Table 7: A list of facial associated candidate gene variants previously reported in facial GWASs
Legend: The table provides previously reported variant of facial GWAS studies. For each SNP, the table contains rsid, chromosome, position (GRCh37/hg19), allele information, the annotated genes, and the reference.
rsid	CHR	BP(GRCh37)	cytoBand	A1	A2	Gene	Reference
rs76244841	1	2775953	1p36.32	A	G	PRDM16	17
rs1572037	1	3254369	1p36.32	C	T	PRDM16	17
rs4648379	1	3261516	1p36.32	C	T	PRDM16	1,16
rs742071	1	18979874	1p36.13	T	G	PAX7	17
rs4912082	1	19716796	1p36.13	C	T	CAPZB	17
rs16834081	1	31292641	1p35.2	C	T	MATN1	17
rs702489	1	54197688	1p32.3	A	G	GLIS1	3
rs199971562	1	56604984	1p32.2	C	CTG	PLPP3	17
rs4916068	1	60997570	1p32.1	T	C	C1orf87	4
rs4916071	1	61020499	1p32.1	A	G	c1orf87	17
rs79297754	1	75634995	1p31.1	A	G	SLC44A5	17
rs12070922	1	81708846	1p31.1	A	G	LPHN2	17
rs619686	1	110218761	1p13.3	G	A	ALX3	5
rs647711	1	117122288	1p13.1	C	G	IGSF3	12
rs1229119	1	119023640	1p12	T	C	TBX15,WARS2	13
rs7513680	1	119150968	1p12	C	T	TBX15,WARS2	17
rs1766786	1	119452500	1p12	T	G	TBX15,WARS2	3
rs3936018	1	119682370	1p12	C	T	TBX15,WARS2	17
rs72691108	1	119762175	1p12	A	G	TBX15,WARS2	4
rs17023457	1	119875730	1p12	C	T	TBX15,WARS2	17,18
rs11589479	1	155033308	1q22	A	G	ADAM15	3,17
rs1336149	1	156939175	1q23.1	C	T	ARHGEF11	3
rs577676	1	170587340	1q24.2	T	C	PRRX1	17
rs10919462	1	170734890	1q24.2	A	C	PRRX1	17
rs2821116	1	197329041	1q31.3	A	T	ASPM	4
rs2476023	1	197351039	1q31.3	C	G	CRB1	3
rs2759656	1	197352969	1q31.3	A	G	CRB1	17
rs4915551	1	197508901	1q31.3	G	A	DENND1B	15
rs5781117	1	219642187	1q41	T	TG	LYPLAL1	3,16
rs12039502	1	221197709	1q41	C	G	MARK1	17
rs7558413	2	18721662	2p24.2	G	A	NT5C1B	17
rs6715010	2	19277788	2p24.1	T	C	OSR1	17
rs79037251	2	19503015	2p24.1	T	G	OSR1	17
rs7567283	2	19595772	2p24.1	C	T	OSR1-WDR35	10
rs1427539	2	19773420	2p24.1	C	T	OSR1	17
rs6740960	2	42181679	2p21	A	T	PKDCC	3,4,17
rs10189338	2	42238622	2p21	C	T	PKDCC	17
rs7590268	2	43540125	2p21	G	T	THADA	17
rs921119	2	45272812	2p21	C	T	SIX3	17
rs35395759	2	45350661	2p21	T	C	SIX2	17
rs17868256	2	52032773	2p16.3	A	G	LOC730100	9
rs1367228	2	56112440	2p16.1	A	C	EFEMP1	17
rs13035645	2	60633463	2p16.1	A	T	BCL11A	17
rs6546175	2	65976905	2p14	T	C	SPRED2	17
rs3891585	2	66756976	2p14	A	G	MEIS1	17
rs11675008	2	67916875	2p14	A	G	PNO1	17
rs17655927	2	71827385	2p13.2	T	C	DYSF	17
rs772154	2	97021664	2q11.2	T	G	NCAPH	17
rs10175706	2	104631814	2q12.1	C	T	LOC100287010	3
rs62152530	2	107073501	2q12.2	C	T	RGPD3	12
rs3827760	2	109513601	2q12.3	A	G	EDAR	6,16,18
rs7597495	2	112625010	2q13	G	T	FBLN7	17
rs11692600	2	119046519	2q14.2	C	T	INSIG2	17
rs332108	2	119440930	2q14.2	C	A	EN1	17
rs7560738	2	134661593	2q21.2	A	G	TMEM163	11
rs11688237	2	144560021	2q22.3	A	G	GTDC1	3
rs17479393	2	145653287	2q22.3	T	A	TEX41	3
rs148912137	2	145658303	2q22.3	T	C	ZEB2	17
rs2080401	2	171540823	2q31.1	A	C	SP5	18
rs2884836	2	176533433	2q31.1	C	T	KIAA1715	13
rs970797	2	177111819	2q31.1	T	G	HOXD cluster	4,10,17
rs10178696	2	177365619	2q31.1	A	G	MTX2	17
rs59156997	2	177371846	2q31.1	AT	A	HOXD cluster	3
rs8176501	2	188353663	2q32.1	G	T	CALCRL	17
rs13035389	2	199666111	2q33.1	T	C	SATB2	3,17
rs4675617	2	200342749	2q33.1	A	G	SATB2	17
rs974448	2	223005314	2q36.1	G	A	PAX3	1
rs34460569	2	223026935	2q36.1	T	C	PAX3	3
rs1370926	2	223030502	2q36.1	G	C	PAX3	17
rs10176525	2	223039052	2q36.1	A	T	PAX3	4
rs7559271	2	223068286	2q36.1	A	G	PAX3	6,7,16
rs4674676	2	223529112	2q36.1	G	A	FARSB	3
rs7579011	2	223543633	2q36.1	A	G	FARSB	17
rs1048603	2	234394487	2q37.1	A	G	USP40	12
rs838543	2	234432017	2q37.1	G	A	USP40	12
rs4686337	3	9311215	3p25.3	T	A	SRGAP3-SETD5	17
rs73048344	3	24765405	3p24.2	G	A	THRB	17
rs17054293	3	54724560	3p14.3	A	T	CACNA2D3	17
rs56063440	3	54731374	3p14.3	C	G	CACNA2D3	3
rs1982862	3	55064740	3p14.3	A	C	CACNA2D3	7
rs9310210	3	71227306	3p13	A	T	FOXP1	3
rs9310211	3	71231744	3p13	A	G	FOXP1	17
rs424737	3	78815906	3p12.3	G	A	ROBO1	3
rs61672954	3	82196528	3p12.2	A	G	LINC02008	9
rs3072056	3	86763101	3p12.1	C	CTAAGA	VGLL3	17
rs34199564	3	94209591	3q11.2	A	G	ARL13B	17
rs793487	3	99495422	3q12.1	A	C	COL8A1	17
rs113663609	3	99924002	3q12.1	A	G	CMSS1	13
rs1391361	3	111257405	3q13.13	T	G	CD96	17
rs7633584	3	118656515	3q13.32	T	C	IGSF11	14
rs2977562	3	128106267	3q21.3	G	A	RAB7A,ACAD9	4
rs7373685	3	128107020	3q21.3	C	A	GATA2	17
rs6795164	3	133885925	3q22.2	A	G	SLCO2A1	17
rs12633011	3	138938995	3q23	A	G	PISRT1	15
rs10212419	3	139004920	3q23	A	G	MPRS22	18
rs12495832	3	147829477	3q24	A	G	AGTR1	3
rs11717138	3	156534628	3q25.31	T	C	LEKR1	3
rs792736	3	157482916	3q25.32	C	G	SHOX2	17
rs11713363	3	157828322	3q25.32	T	C	RSRC1	3
rs79909949	3	159492478	3q25.33	C	T	SCHIP1	2
rs9868698	3	159628736	3q25.33	C	T	SCHIP1	2,10
rs2133593	3	177301992	3q26.32	C	A	LINC00578	3
rs58022575	3	184333169	3q27.1	GA	G	EPHB3,DVL3	4,17
rs13097965	3	184339757	3q27.1	T	C	EPHB3	3
rs56081252	3	184375948	3q27.1	A	G	EPHB3	17
rs17447439	3	189549423	3q28	G	A	TP63	1
rs74921869	4	1013382	4p16.3	A	G	FGFRL1	17
rs3910659	4	4537916	4p16.2	G	T	STX18	17
rs13117653	4	4805454	4p16.2	A	G	MSX1	17
rs60159418	4	31120752	4p15.1	G	A	PCDH7	9
rs6851148	4	101218062	4q24	A	C	EMCN	3
rs7674010	4	109294589	4q25	T	C	LEF1	17
rs514892	4	111843671	4q25	G	A	PITX2	17
rs7655723	4	120328666	4q26	A	G	MYOZ2	17
rs7694450	4	121998104	4q27	A	G	PRDM5	17
rs6852838	4	126935475	4q28.1	G	A	FAT4	17
rs145365164	4	126954652	4q28.1	C	T	FAT4	3
rs62324070	4	127928593	4q28.1	A	G	INTU	17
rs12504954	4	127948196	4q28.1	A	G	INTU	13
rs1960918	4	151222266	4q31.3	A	G	LRBA	18
rs6535972	4	154824681	4q31.3	C	G	SFRP2	13
rs9995821	4	154828366	4q31.3	C	T	DCHS2	4,17
rs2045323	4	154831899	4q31.3	A	G	DCHS2	6,15
rs12644248	4	155235392	4q31.3	G	A	DCHS2	6
rs4342159	4	169503180	4q32.3	A	G	PALLD	17
rs12505328	4	174378004	4q34.1	C	T	SCRG1	3
rs4695846	4	174456858	4q34.1	A	G	HAND2	17
rs3054104	4	175047506	4q34.1	CAT	C	HPGD	17
rs17275866	4	175071486	4q34.1	A	G	FBXO8	3
rs12509218	4	177587237	4q34.3	G	A	VEGFC	3
rs62354288	5	20558014	5p14.3	T	A	CDH18	4
rs4866909	5	44580193	5p12	C	A	FGF10	17
rs11738462	5	61013776	5q12.1	A	G	C5orf64	7
rs199880074	5	73483120	5q13.3	G	GAAAG	ARHGEF28	3
rs10078545	5	82124190	5q14.2	T	A	MIR3977,XRCC4	3,17
rs76770688	5	112985673	5q22.2	G	A	MCC	17
rs13182341	5	128107907	5q23.3	C	T	FBN	17
rs4958741	5	153868262	5q33.2	A	G	HAND1	3
rs4582322	5	159509400	5q33.3	G	T	FABP6	17
rs6555969	5	171128464	5q35.1	T	C	C5orf50,FGF18	1,17
rs17073930	5	171190826	5q35.1	G	A	FGF18	17
rs4868444	5	174160113	5q35.2	C	T	MSX2	3
rs118078182	5	177922198	5q35.3	A	G	COL23A1	9
rs4959652	6	2386913	6p25.2	A	G	MYLK4	17
rs7755467	6	23557322	6p22.3	C	T	NRSN1	17
rs9274522	6	32634373	6p21.32	T	C	COL11A2	17
rs1520	6	39526867	6p21.2	G	A	DAAM2	17
rs227832	6	44681257	6p21.1	C	T	SUPT3H	17
rs227833	6	44681840	6p21.1	C	G	SUPT3H	4
rs17336368	6	44751668	6p21.1	A	G	SUPT3H	3
rs35991735	6	44820741	6p21.1	A	AG	SUPT3H	3
rs1852985	6	45329656	6p21.1	T	C	SUPT3H/RUNX2	6
rs73457129	6	45574050	6p21.1	A	G	RUNX2	17
rs12055796	6	46306547	6p12.3	T	C	RCAN2	17
rs2817419	6	50845193	6p12.3	G	A	TFAP2B	2
rs35965172	6	50849828	6p12.3	T	C	TFAP2B	2
rs9381923	6	50985886	6p12.3	T	C	TFAP2B	17
rs6923760	6	51685228	6p12.3	G	T	PKHD1	17
rs142900698	6	52834739	6p12.2	C	G	GSTA4	3
rs4715567	6	55719867	6p12.1	A	G	BMP5	17
rs112411726	6	85708585	6q14.3	AATGTG	A	TBX18	17
rs112215522	6	94913574	6q16.1	T	C	EPHA7	3
rs6568401	6	106188818	6q21	C	T	PRDM1	17
rs9388518	6	127103785	6q22.33	A	C	RSPO3	17
rs519332	6	133571272	6q23.2	A	G	EYA4	17
rs5880172	6	133615646	6q23.2	A	ACT	RPS12,EYA4	4
rs34729823	6	136274369	6q23.3	G	GCT	MTFR2	17
rs263156	6	142907515	6q24.2	A	C	LOC153910	18
rs6570789	6	147401193	6q24.3	T	A	STXBP5-AS1	14
rs9456748	6	162590018	6q26	A	G	PARK2	8
rs3736712	6	169669889	6q27	G	A	WDR27	10
rs2108791	7	7253520	7p22.1	T	C	COL28A1	17
rs1178103	7	18741367	7p21.1	G	T	HDAC9	14
rs212672	7	18797190	7p21.1	A	T	TWIST1	17
rs2465274	7	27108127	7p15.2	A	G	HOXA2	17
rs17640804	7	42131390	7p14.1	C	T	GLI3	6
rs62443772	7	42131949	7p14.1	A	T	GLI3	17
rs12535551	7	46677370	7p12.3	G	A	IGFBP3	17
rs17134499	7	51831741	7p12.1	T	C	COBL(intergenic)	14
rs7806852	7	81218318	7q21.11	G	A	HGF	17
rs7807002	7	84296811	7q21.11	A	G	SEMA3A	17
rs10238953	7	96124975	7q21.3	G	A	DLX6, DYNC1L1	4
rs11768577	7	96143804	7q21.3	G	T	C7orf76	3
rs4296976	7	96156848	7q21.3	C	A	DLX6	17
rs884373	7	120780483	7q31.31	T	G	WNT16	17
rs6950680	7	120790287	7q31.31	G	A	CPED1,WNT16	14
rs798682	7	121987158	7q31.32	A	C	FEZF1	17
rs4732070	7	134624356	7q33	T	G	CALD1	17
rs6948022	7	137664771	7q33	T	C	DGK1	17
rs2976940	8	8279462	8p23.1	T	G	USP17L8	17
rs12114954	8	8904862	8p23.1	G	T	PPP1R3B	17
rs2929451	8	9085295	8p23.1	T	A	PPP1R3B	3
rs657913	8	9882575	8p23.1	G	T	MSRA	17
rs11782517	8	10113507	8p23.1	C	T	MSRA	3
rs767764	8	13199810	8p22	G	C	DLC1	3
rs5029306	8	26453105	8p21.2	T	C	DPYSL2	17
rs2347498	8	32353180	8p12	C	T	NRG1	3
rs149814396	8	41087109	8p11.21	T	C	SFRP1	17
rs56252175	8	49445257	8q11.21	G	GT	SNAI2	17
rs116867275	8	52584738	8q11.22	C	A	PXDNL	17
rs10504499	8	72036904	8q13.3	G	T	EYA1	3
rs1588405	8	78588654	8q21.12	C	A	PKIA	17
rs9642796	8	88597076	8q21.3	G	A	DCAF4L2	13
rs139016242	8	99244975	8q22.2	TA	T	POP1	17
rs11988731	8	100078926	8q22.2	C	T	VPS13B	15
rs60373317	8	100509357	8q22.2	A	C	VPS13B	17
rs75976055	8	100626502	8q22.2	C	T	VPS13B	14
rs10089785	8	109599969	8q23.1	C	T	TRHR	17
rs2245221	8	116624879	8q23.3	G	A	TRPS1	17
rs11337200	8	116713794	8q23.3	AT	A	TRPS1	17
rs7843236	8	121980512	8q24.12	T	A	SNTB1	17
rs2581548	8	122256121	8q24.12	A	G	HAS2	17
rs12541121	8	123101743	8q24.13	A	G	HAS2-AS1	3
rs871502	8	129863648	8q24.21	G	C	CCDC26	17
rs7836044	8	137893150	8q24.23	C	T	KHDRBS3	2
rs10809266	9	1106093	9p24.3	A	G	DMRT2	3
rs7859005	9	1128641	9p24.3	G	A	DMRT2	17
rs4237150	9	4290085	9p24.2	C	G	GLIS3	3
rs10758593	9	4292083	9p24.2	A	G	GLIS3	17
rs303751	9	14480820	9p22.3	A	G	FREM1	17
rs72713618	9	14883254	9p22.3	A	G	FREM1	8
rs10962767	9	16958463	9p22.2	C	A	BNC2,CNTLN	3,17
rs10868138	9	86917301	9q21.33	C	T	SLC28A3	12
rs2230578	9	94485928	9q22.31	C	T	ROR2	13,17
rs10761129	9	94486321	9q22.31	C	T	ROR2	3
rs12553508	9	96446445	9q22.31	T	C	BARX1	17
rs145965565	9	98273305	9q22.32	G	T	PTCH1	17
rs1999464	9	111371123	9q31.3	C	T	ELP1	17
rs62578082	9	129277041	9q33.3	C	A	MVB12B	3
rs10448285	9	129397014	9q33.3	T	C	LMX1B	17
rs1902713	10	48442078	10q11.22	C	T	GDF10	17
rs1194708	10	54199812	10q21.1	G	A	DKK1	3
rs2045145	10	54957212	10q21.1	A	G	PCDH15	11
rs9633535	10	63836088	10q21.2	T	C	ARID5B	17
rs138458666	10	76358087	10q22.2	T	TA	KAT6B	17
rs11001765	10	78150285	10q22.3	A	C	C10orf11	3
rs1907342	10	78163768	10q22.3	G	A	C10orf11	17
rs1536446	10	97259560	10q24.1	G	A	TCTN3	17
rs11190970	10	103128332	10q24.32	A	G	FGF8	17
rs805722	10	105810400	10q25.1	T	C	COL17A1	1
rs242983	10	119276361	10q26.11	A	G	EMX2	17
rs34988394	10	119738984	10q26.11	T	C	EMX2	17
rs1696840	10	123343909	10q26.13	G	T	FGFR2	17
rs907613	11	1874292	11p15.5	A	G	LSP1	14
rs6578283	11	2673575	11p15.5	G	A	KCNQ1	17
rs34121257	11	16224877	11p15.1	GA	G	SOX6	17
rs7121535	11	44336938	11p11.2	T	C	ALX4	17
rs10838269	11	44378010	11p11.2	C	T	ALX4	17
rs1868752	11	122391442	11q24.1	G	T	UBASH3B	9
rs10743452	12	8841413	12p13.31	A	G	A2ML1	17
rs11049359	12	28279773	12p11.22	C	T	PTHLH	17
rs7970054	12	59314712	12q14.1	C	T	LRIG3	17
rs60493340	12	65856151	12q14.3	G	T	WIF1	17
rs11175967	12	66321344	12q14.3	G	C	HMGA2	17
rs141753469	12	66397166	12q14.3	C	A	HMGA2	3
rs2695152	12	77927796	12q21.2	G	A	NAV3	17
rs10160931	12	78216016	12q21.2	G	T	NAV3	17
rs10862567	12	83422352	12q21.31	T	A	TMTC2	7
rs58687115	12	84199728	12q21.31	C	CT	gene desert	17
rs4385969	12	84395428	12q21.31	A	G	SLC6A15	17
rs11609649	12	85576492	12q21.31	A	G	ALX1	17
rs10779162	12	85881917	12q21.31	T	G	ALX1	17
rs10779169	12	85967804	12q21.31	G	A	RASSF9	3
rs2098990	12	115419855	12q24.21	A	C	TBX3	17
rs1863716	12	115420240	12q24.21	C	A	TBX3	13
rs73168105	13	22713708	13q12.11	G	T	FGF9	3
rs7325564	13	51724664	13q14.3	T	C	LINC00371	13
rs66516258	13	80489124	13q31.1	T	TTA	SPRY2	17
rs11842203	13	95508654	13q32.1	G	A	TGDS-SOX21	17
rs9524742	13	95650055	13q32.1	T	C	TGDS-SOX21	17
rs2390383	13	100974098	13q32.3	A	C	PCCA	17
rs9558696	13	106821580	13q33.2	T	C	EFNB2	17
rs146188897	13	110372691	13q34	ACCAGGCTTTGTTCC	A	IRS2	3
rs1411551	13	110373035	13q34	A	T	IRS2	17
rs8007643	14	21365801	14q11.2	T	C	RNASE3, ZNF219	5
rs59081965	14	37513151	14q13.3	TC	T	PAX9	17
rs17106852	14	38038468	14q21.1	G	A	PAX9, MIPOL1	5
rs12878658	14	54077802	14q22.1	A	G	BMP4	17
rs72678242	14	54255510	14q22.2	G	A	BMP4	3
rs10047930	14	59461017	14q23.1	T	C	DACT1	17
rs12881623	14	61564837	14q23.1	C	T	SIX1	17
rs12890110	14	68781595	14q24.1	C	T	RAD51B	17
rs34702092	14	68991747	14q24.1	CA	C	RAD51B	3
rs2224309	14	95333678	14q32.13	A	C	GSC	3
rs7161418	14	95479889	14q32.13	T	G	DICER1	3
rs1989285	14	98384537	14q32.2	C	G	C14orf64	13
rs1542448	14	98873074	14q32.2	A	G	BCL11B	17
rs76810699	14	99018688	14q32.2	A	G	BCL11B	17
rs1257585	14	99521392	14q32.2	A	C	BCL11B	17
rs6494598	15	32995468	15q13.3	C	A	GREM1	3
rs148375239	15	33002864	15q13.3	T	C	GREM1	17
rs34961041	15	36552603	15q14	A	G	MEIS2	17
rs2306022	15	68628163	15q23	T	C	ITGA11	17
rs34430707	15	71755645	15q23	G	A	THSD4	17
rs112087864	15	71860977	15q23	T	C	THSD4	17
rs2401176	15	84578364	15q25.2	G	T	ADAMTSL3	17
rs12908400	15	85573176	15q25.3	G	T	PDE8A	2
rs12909111	15	85604326	15q25.3	G	A	PDE8A	2
rs7167736	15	101206638	15q26.3	T	G	ASB7	3
rs16949899	16	51564940	16p12.1	T	G	SALL1	13
rs9923447	16	53643103	16q12.2	T	C	RPGRIP1L	17
rs7404301	16	53735383	16q12.2	A	G	RPGRIP1L	13
rs11642644	16	84072101	16q23.3	C	T	MBTPS1	11
rs62051935	16	86495862	16q24.1	A	G	FOXC2	17
rs61646804	16	86608898	16q24.1	C	CAA	FOXL1	3
rs8069947	17	1985843	17p13.3	T	C	SMG6	14
rs2760734	17	2027644	17p13.3	T	C	DPH1	17
rs80067372	17	7452752	17p13.1	A	G	TNFSF12	3
rs9899183	17	7452977	17p13.1	C	T	SHBG	17
rs7218433	17	54304717	17q22	G	T	NOG	17
rs227727	17	54776955	17q22	T	A	NOG	17
rs9893705	17	59269555	17q23.2	T	C	TBX4	17
rs11650175	17	63743650	17q24.1	C	T	CEP112	3
rs34439270	17	67727076	17q24.3	A	ATGT	KCNJ2	17
rs8077906	17	69112233	17q24.3	G	A	CASC17	13
rs56347314	17	69123106	17q24.3	C	T	CASC17	3
rs9908442	17	69137948	17q24.3	A	G	SOX9	17
rs11655006	17	69139583	17q24.3	G	A	BC039327	4
rs34091987	17	70025587	17q24.3	T	C	SOX9	3
rs2193054	17	70025809	17q24.3	G	C	SOX9	10
rs9302943	17	70034189	17q24.3	A	T	SOX9	17
rs5821892	17	70036479	17q24.3	CG	C	SOX9	4
rs2359442	18	41543937	18q12.3	A	G	SETBP1	17
rs1619249	18	49190644	18q21.2	G	A	LOC100287225	18
rs7243821	18	52655532	18q21.2	A	G	CCDC68	3
rs11665450	18	52844766	18q21.2	T	C	TCF4	17
rs634687	18	72906960	18q22.3	G	T	TSHZ1	17
rs287104	19	34290995	19q13.11	A	G	KCTD15	4,17
rs6139982	20	6411560	20p12.3	A	G	BMP2	17
rs3920540	20	7067738	20p12.3	G	T	BMP2	9
rs116792	20	9971408	20p12.2	G	A	MKKS	17
rs2073323	20	13514434	20p12.1	C	G	TASP1	3
rs2424390	20	21626627	20p11.22	A	T	PAX1	4
rs2424399	20	21632545	20p11.22	C	A	PAX1	5
rs6047635	20	21781625	20p11.22	T	G	PAX1	17
rs6047637	20	21785073	20p11.22	C	T	PAX1	17
rs927833	20	22041577	20p11.22	T	C	PAX1	6
rs4813454	20	22284723	20p11.22	T	C	PAX1	13
rs6113624	20	22286430	20p11.22	A	G	FOXA2	17
rs1474738	20	31380309	20q11.21	A	G	DNMT3B	17
rs2206437	20	37992741	20q11.23	T	A	DHX35	10
rs877313	20	38082252	20q12	C	T	DHX35	17
rs6028446	20	38101545	20q12	T	A	DHX35	3
rs6101567	20	38105055	20q12	A	G	DHX35	3
rs6129564	20	38904203	20q12	A	G	MAFB	5
rs6022641	20	52274008	20q13.2	C	T	CYP24A1	17
rs35130793	20	55792165	20q13.31	A	C	BMP7	3
rs4811827	20	55798240	20q13.31	C	T	BMP7	17
rs736702	22	45725600	22q13.31	G	A	FBLN1	17
rs6529847	23	5578860	Xp22.32	T	A	NLGN4X	17
rs2520378	23	69017223	Xq13.1	G	A	EDA	17
rs1045686	23	92927634	Xq21.32	G	C	FAM133A	17
rs11167418	23	114665177	Xq23	C	T	PLS3	17
rs4829906	23	136955404	Xq26.3	A	G	ZIC3	17
rs11093404	X	72289467	Xq13.2	A	G	HDAC8	5,8
rs5959351	X	78675583	Xq21.1	T	C	ITM2A	3
Reference			Population
1	Liu, F. et al. A genome-wide association study identifies five loci influencing facial morphology in Europeans. PLoS Genet 8, e1002932 (2012).		European
2	Cole, J.B. et al. Genomewide Association Study of African Children Identifies Association of SCHIP1 and PDE8A with Facial Size and Shape. PLoS Genet 12, e1006174 (2016).		African
3	Pickrell, J.K. et al. Detection and interpretation of shared genetic influences on 42 human traits. Nat Genet 48, 709-17 (2016).		European
4	Claes, P. et al. Genome-wide mapping of global-to-local genetic effects on human facial shape. Nat Genet 50, 414-423 (2018).		European
5	Shaffer, J.R. et al. Genome-Wide Association Study Reveals Multiple Loci Influencing Normal Human Facial Morphology. PLoS Genet 12, e1006149 (2016).		European
6	Adhikari, K. et al. A genome-wide association scan implicates DCHS2, RUNX2, GLI3, PAX1 and EDAR in human facial variation. Nat Commun 7, 11616 (2016).		Latin American
7	Paternoster, L. et al. Genome-wide association study of three-dimensional facial morphology identifies a variant in PAX3 associated with nasion position. Am J Hum Genet 90, 478-85 (2012).		European
8	Lee, M.K. et al. Genome-wide association study of facial morphology reveals novel associations with FREM1 and PARK2. PLoS One 12, e0176566 (2017).		European
9	Qiao, L. et al. Genome-wide variants of Eurasian facial shape differentiation and a prospective model of DNA based face prediction. J Genet Genomics 45, 419-432 (2018).		Admixed population(Eurasian)
10	Cha, S. et al. Identification of five novel genetic loci related to facial morphology by genome-wide association studies. BMC Genomics 19, 481 (2018).		East Asian
11	Crouch, D.J.M. et al. Genetics of the human face: Identification of large-effect single gene variants. Proc Natl Acad Sci U S A 115, E676-E685 (2018).		European
12	Wu, W. et al. Whole-exome sequencing identified four loci influencing craniofacial morphology in northern Han Chinese. Hum Genet 138, 601-611 (2019).		East Asian
13	Xiong, Z. et al. Novel genetic loci affecting facial shape variation in humans. Elife 8(2019).		European
14	Bonfante, B. et al. A GWAS in Latin Americans identifies novel face shape loci, implicating VPS13B and a Denisovan introgressed region in facial variation. Sci Adv 7(2021).		Latin American
15	Huang, Y. et al. A genome-wide association study of facial morphology identifies novel genetic loci in Han Chinese. J Genet Genomics (2020).		East Asian
16	Li, Y. et al. EDAR, LYPLAL1, PRDM16, PAX3, DKK1, TNFSF12, CACNA2D3, and SUPT3H gene variants influence facial morphology in a Eurasian population. Hum Genet 138, 681-689 (2019).3.		Admixed population(Eurasian)
17	White, J.D. et al. Insights into the genetic architecture of the human face. Nat Genet 53, 45-53 (2021).		European
18	Adhikari, K. et al. A genome-wide association study identifies multiple loci for variation in human ear morphology. Nat Commun 6, 7500 (2015).		Latin American

## Sheet: ST8
Supplementary Table 8: P-value of natural selection enrichment analyses for 11 facial regions
Legend: The table conatins the P-value of natural selection enrichment analyses using various approaches. For each segment or anatomic region, we calculated P-value using Fst, XP-EHH, PBS, and selection difference statistics.
Segment	Anatomic Region	Fst	XP-EHH	PBS_EUR	PBS_EAS	Selection Difference
1	Whole face	8.22e-07	0.003782	0.000195262	0.00721965	0.870386
5	Mandible	0.477	0.08634	0.0339841	0.309894	0.114336
7	Forehead	0.0715	0.5974	0.332376	0.17468	0.139862
16	Lower mouth	0.901	0.6058	0.080306	0.424525	0.405625
17	Upper mouth	0.558	0.0102	0.292912	0.981697	0.325961
18	Nose	0.0001	0.00127	0.000690261	0.150363	0.048764
19	Maxillary	0.16	0.2418	0.0569698	0.964446	0.156662
24	Glabellar	0.0292	0.08717	0.0967465	0.218308	0.126578
25	Eye	0.0492	0.26113	0.374766	0.170524	0.007917
26	Temporal	0.0418	0.61	0.611962	0.0566898	0.270116
27	Zygoma	0.136	0.3686	0.159787	0.522941	0.39624
